# Supplementary material for: The formation of the Indo-Pacific montane avifauna
Source: PubMed Central journal article supplement (PMC10713610; doi:10.1038/s41467-023-43964-y), 2023-12-11

## Supplementary Material for

The formation of the Indo-Pacific montane avifauna

Andrew Hart Reeve, Jonathan David Kennedy, Jose Martin Pujolar, Bent Petersen, Mozes P. K. Blom, Per Alström, Tri Haryoko, Per G. P. Ericson, Martin Irestedt, Johan A. A. Nylander, and Knud Andreas Jønsson

**Supplementary Data 2.** Species-level trees. Black circles at nodes indicate posterior probabilities of 0.99-1.00; gray circles indicate PP 0.95-0.98; and white circles indicate PP 0.90-0.94. Nodes without circles have PP < 0.90.

### Contents:

2. Pachycephalidae - p. 2
3. Petroicidae A (*Microeca*) - p. 3
4. Petroicidae B (*Petroica*) - p. 4
5. Stenostiridae - p. 5
6. Pnoepygidae - p. 6
7. Cettiidae - p. 7
8. Locustellidae - p. 8
9. Sturnidae - p. 9
10. Turdidae A (*Geokichla*) - p. 10
11. Turdidae B (*Zoothera*) - p. 11
12. Turdidae C (*Turdus*) - p. 12
13. Muscicapidae A (*Eumyias*) - p. 13
14. Muscicapidae B (*Brachypteryx*) - p. 14
15. Muscicapidae C (*Ficedula*) - p. 15
16. Dicaeidae - p. 16
17. Fringillidae - p. 17

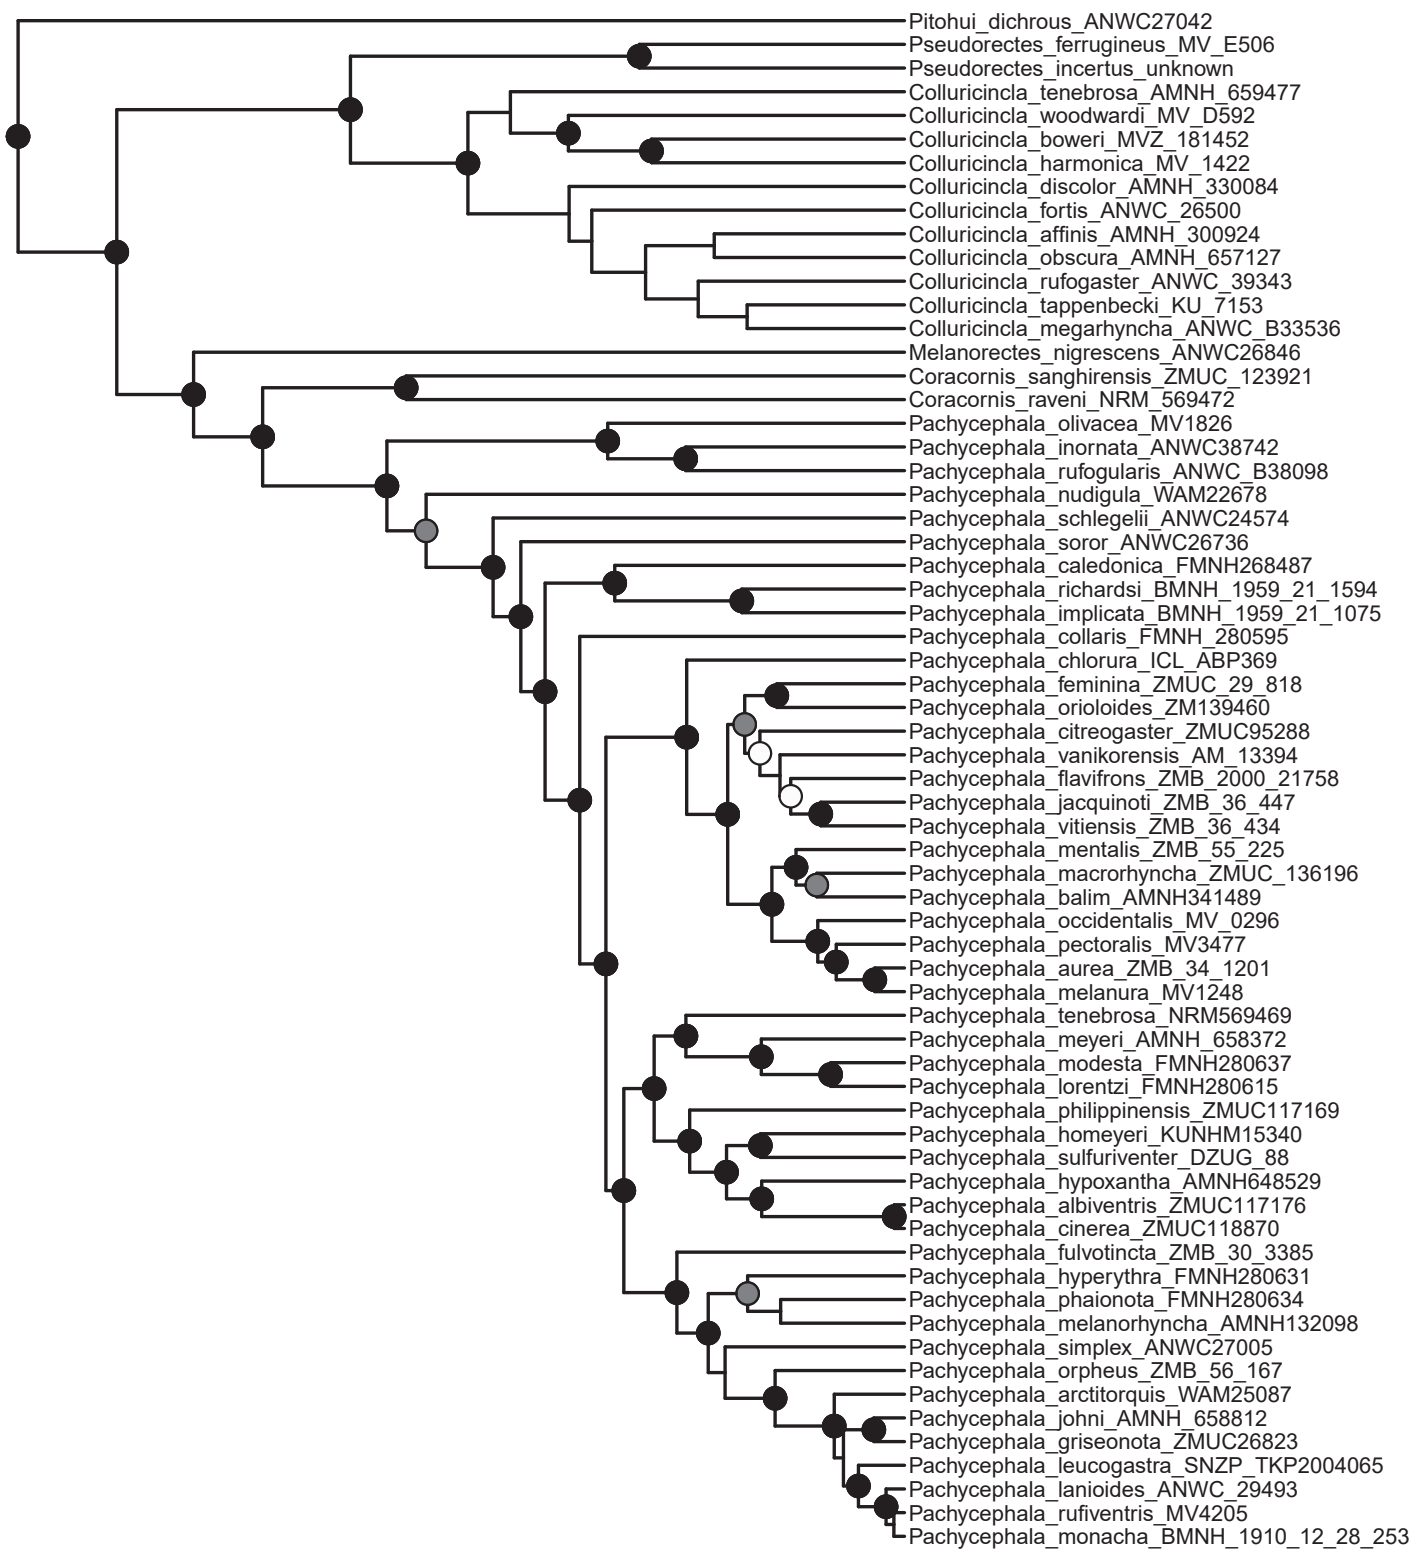

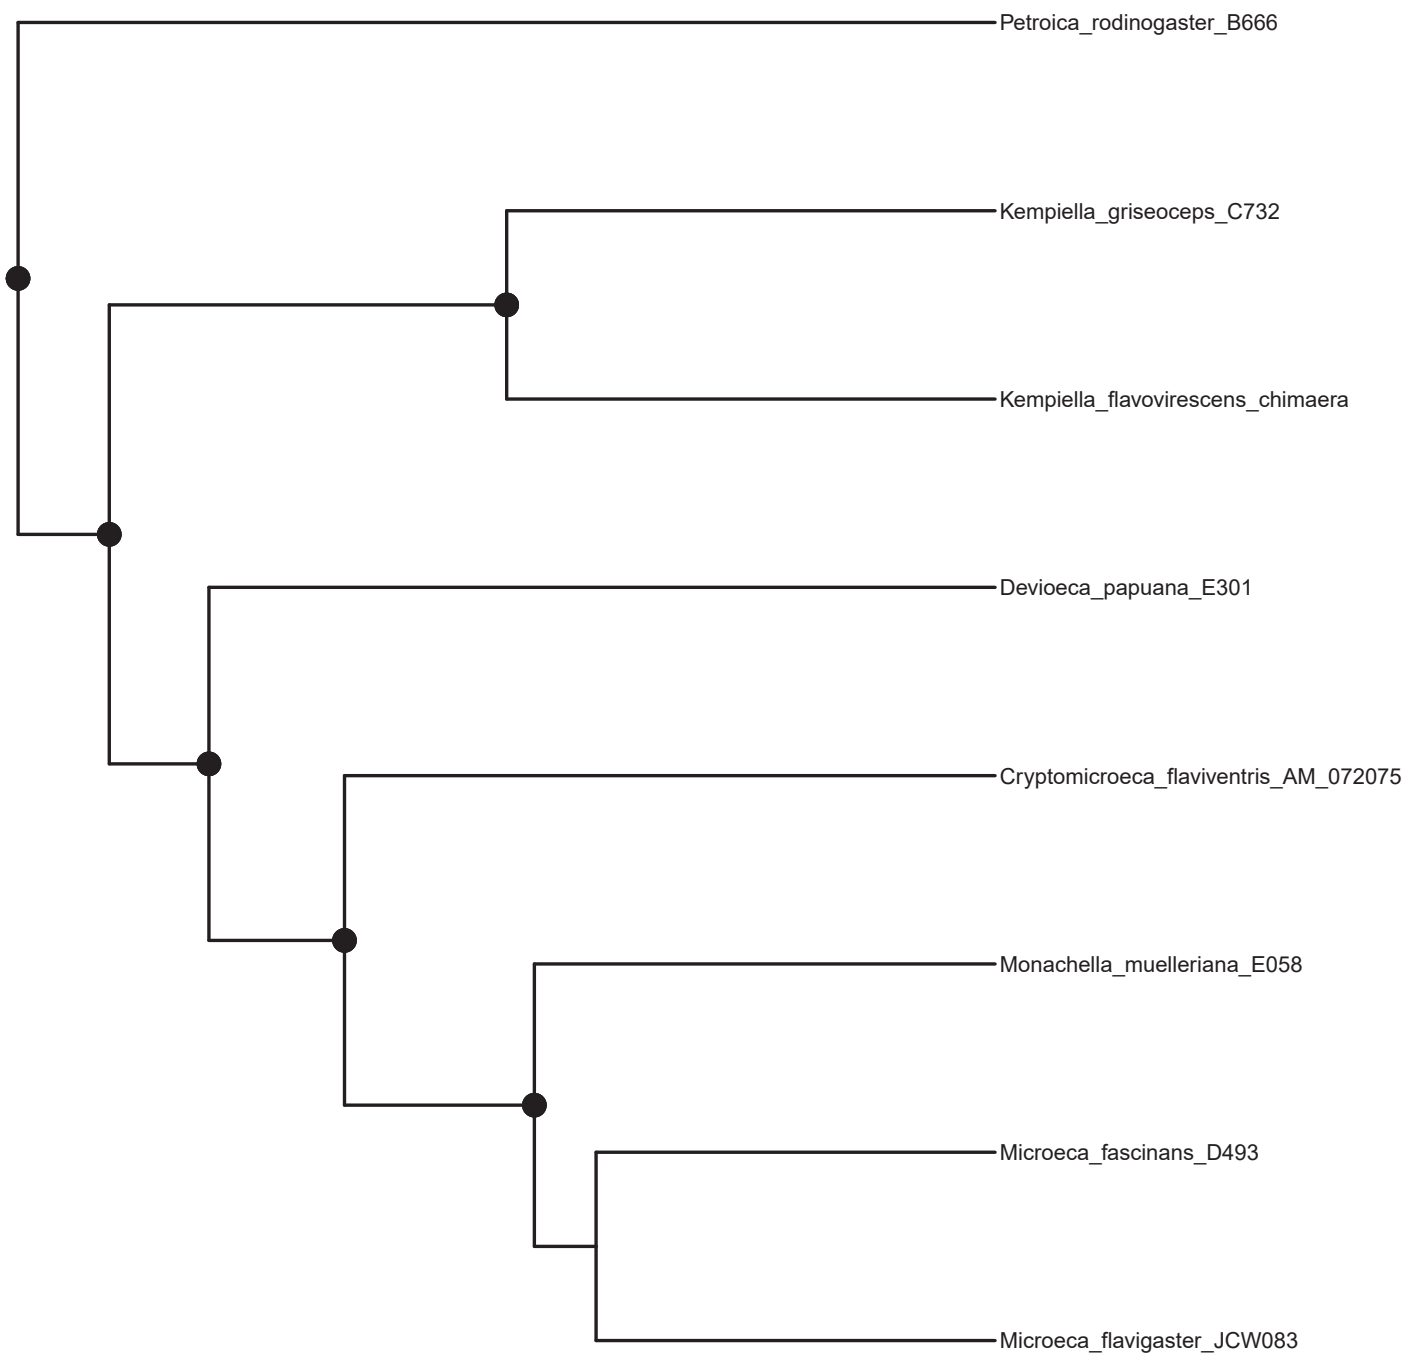

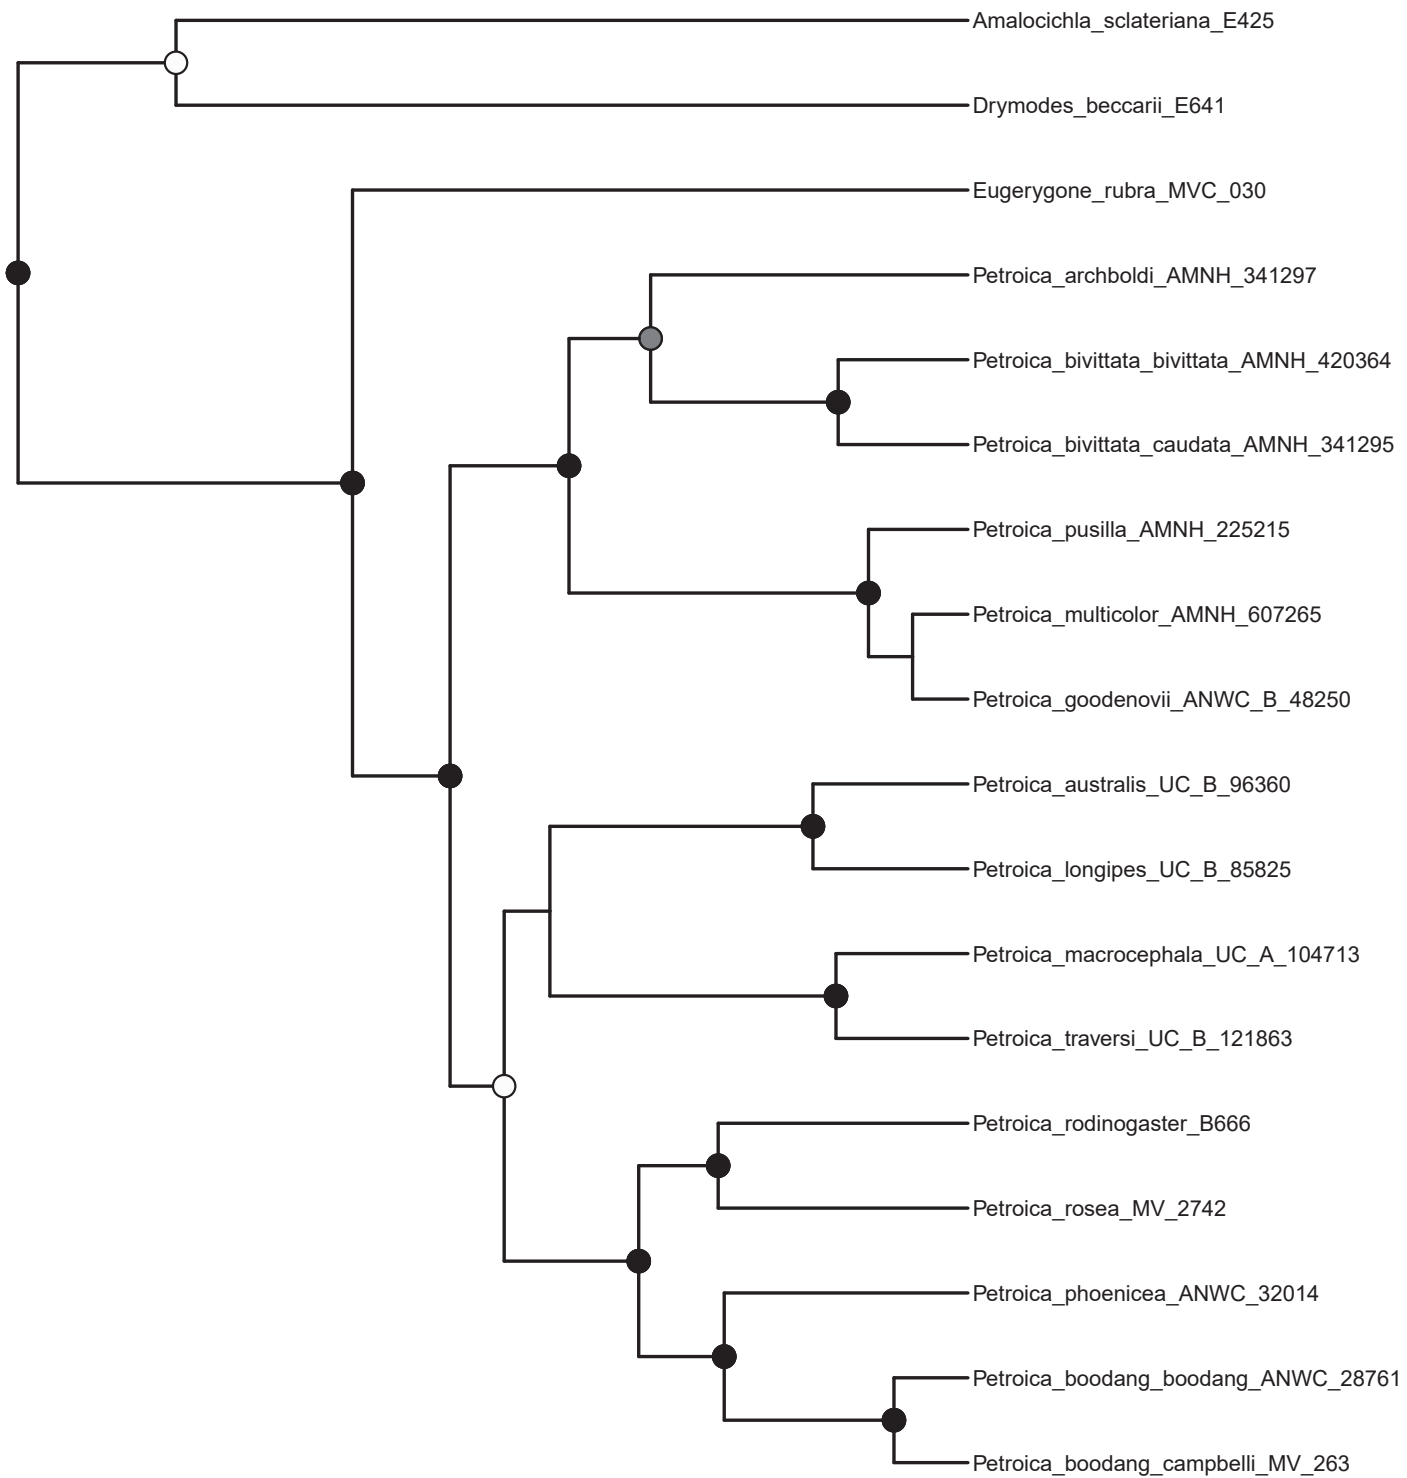

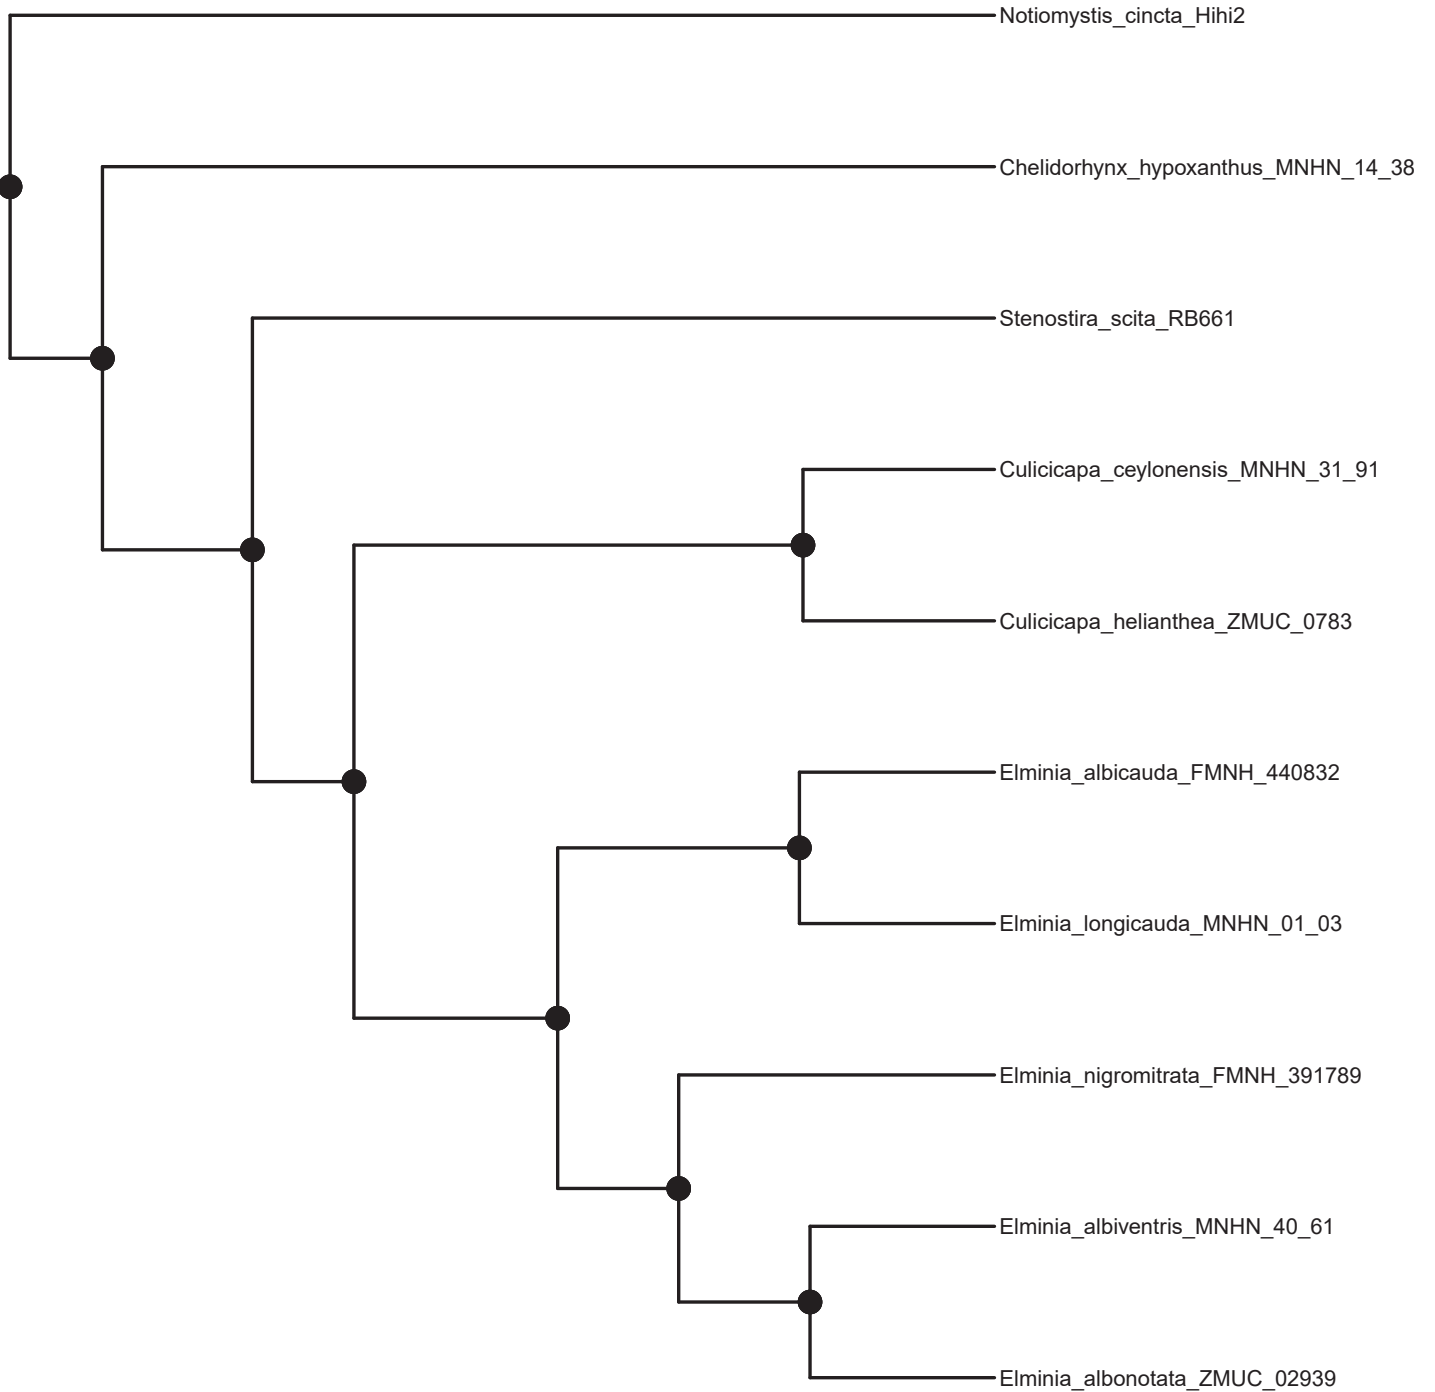

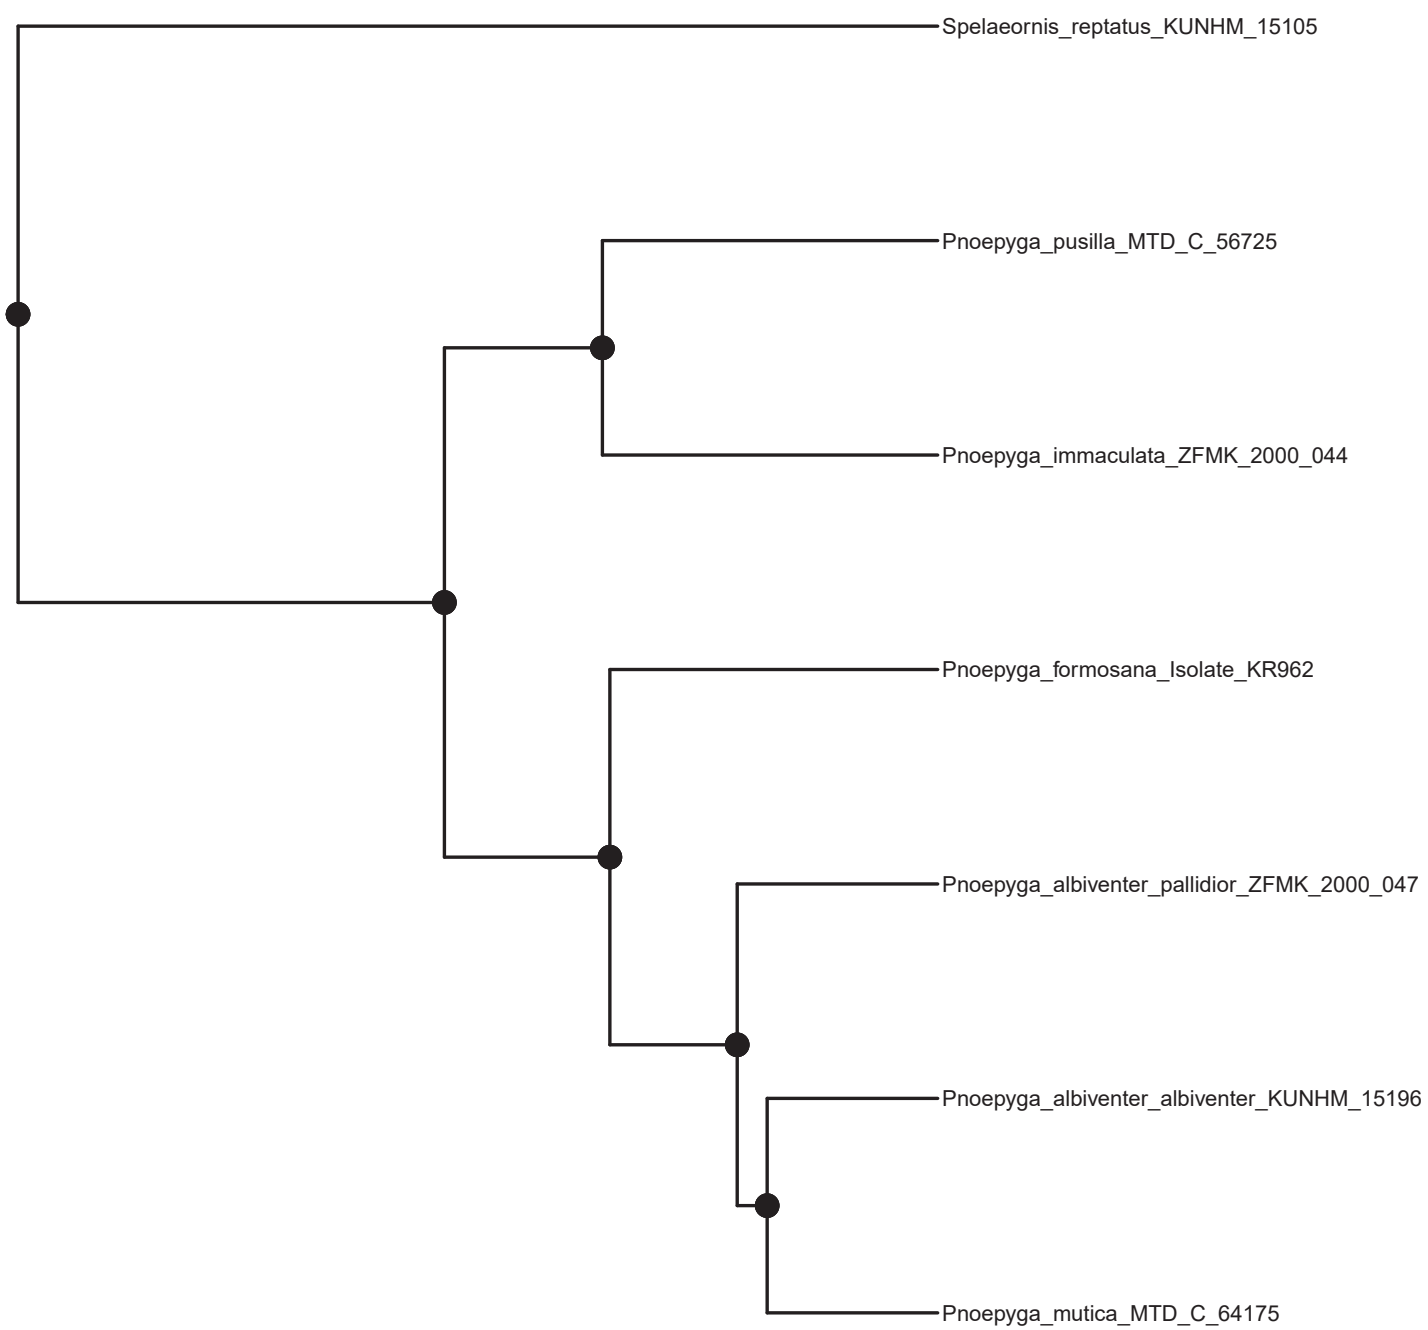

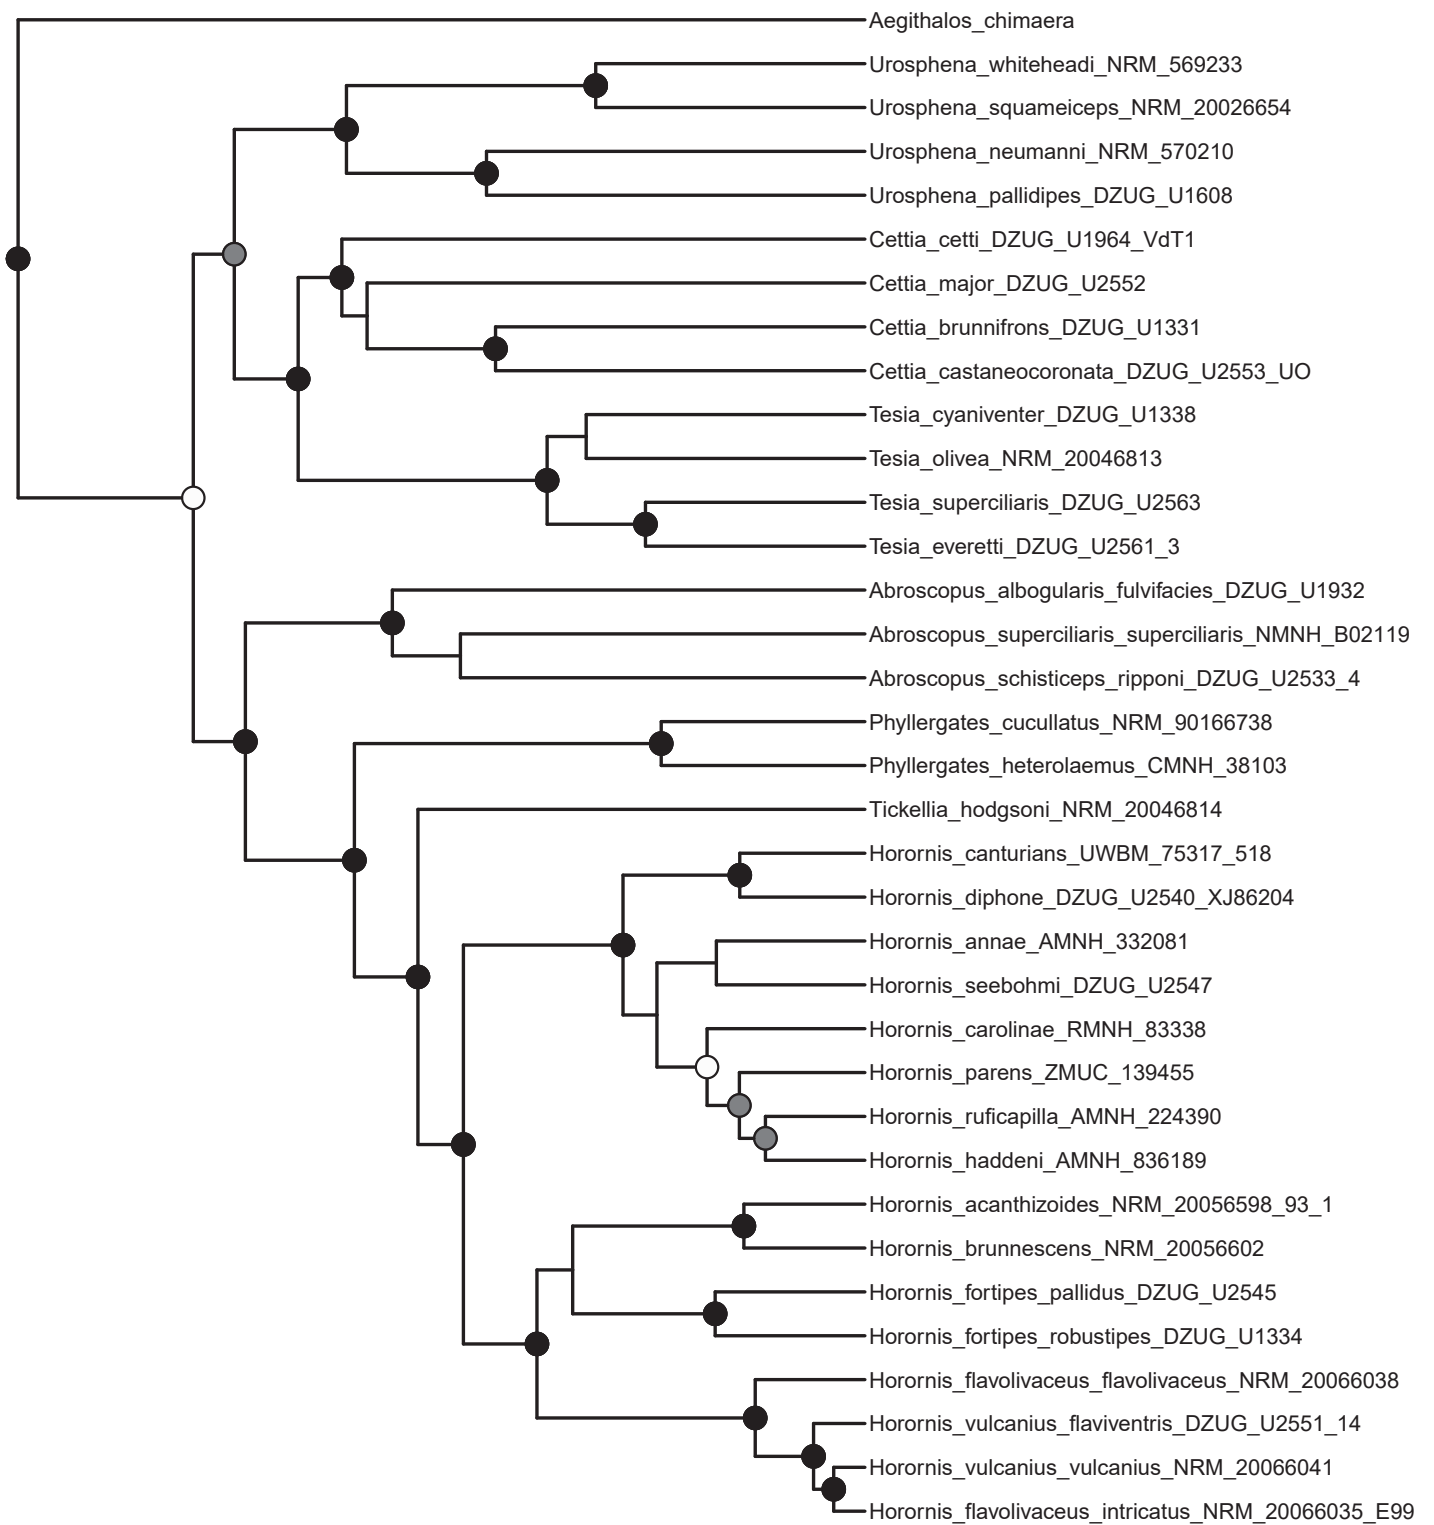

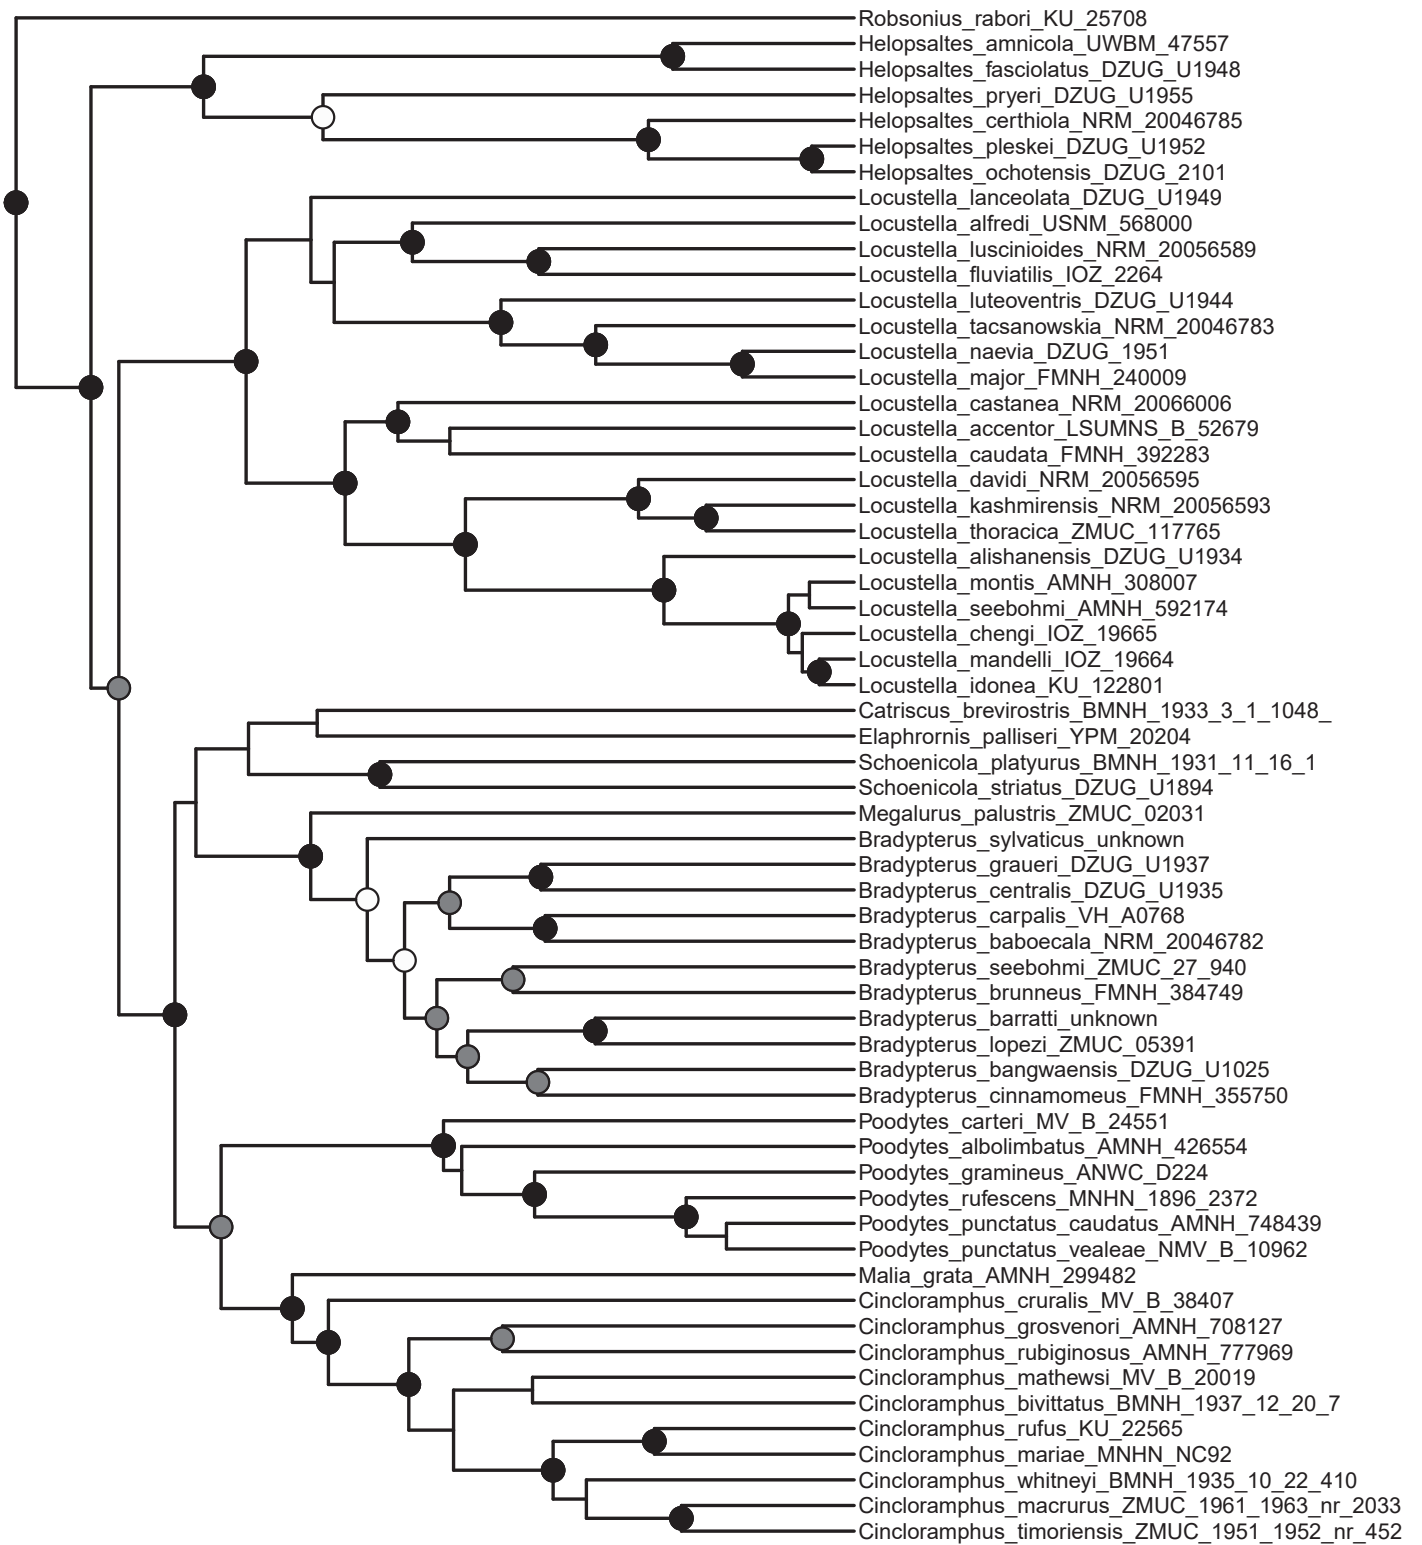



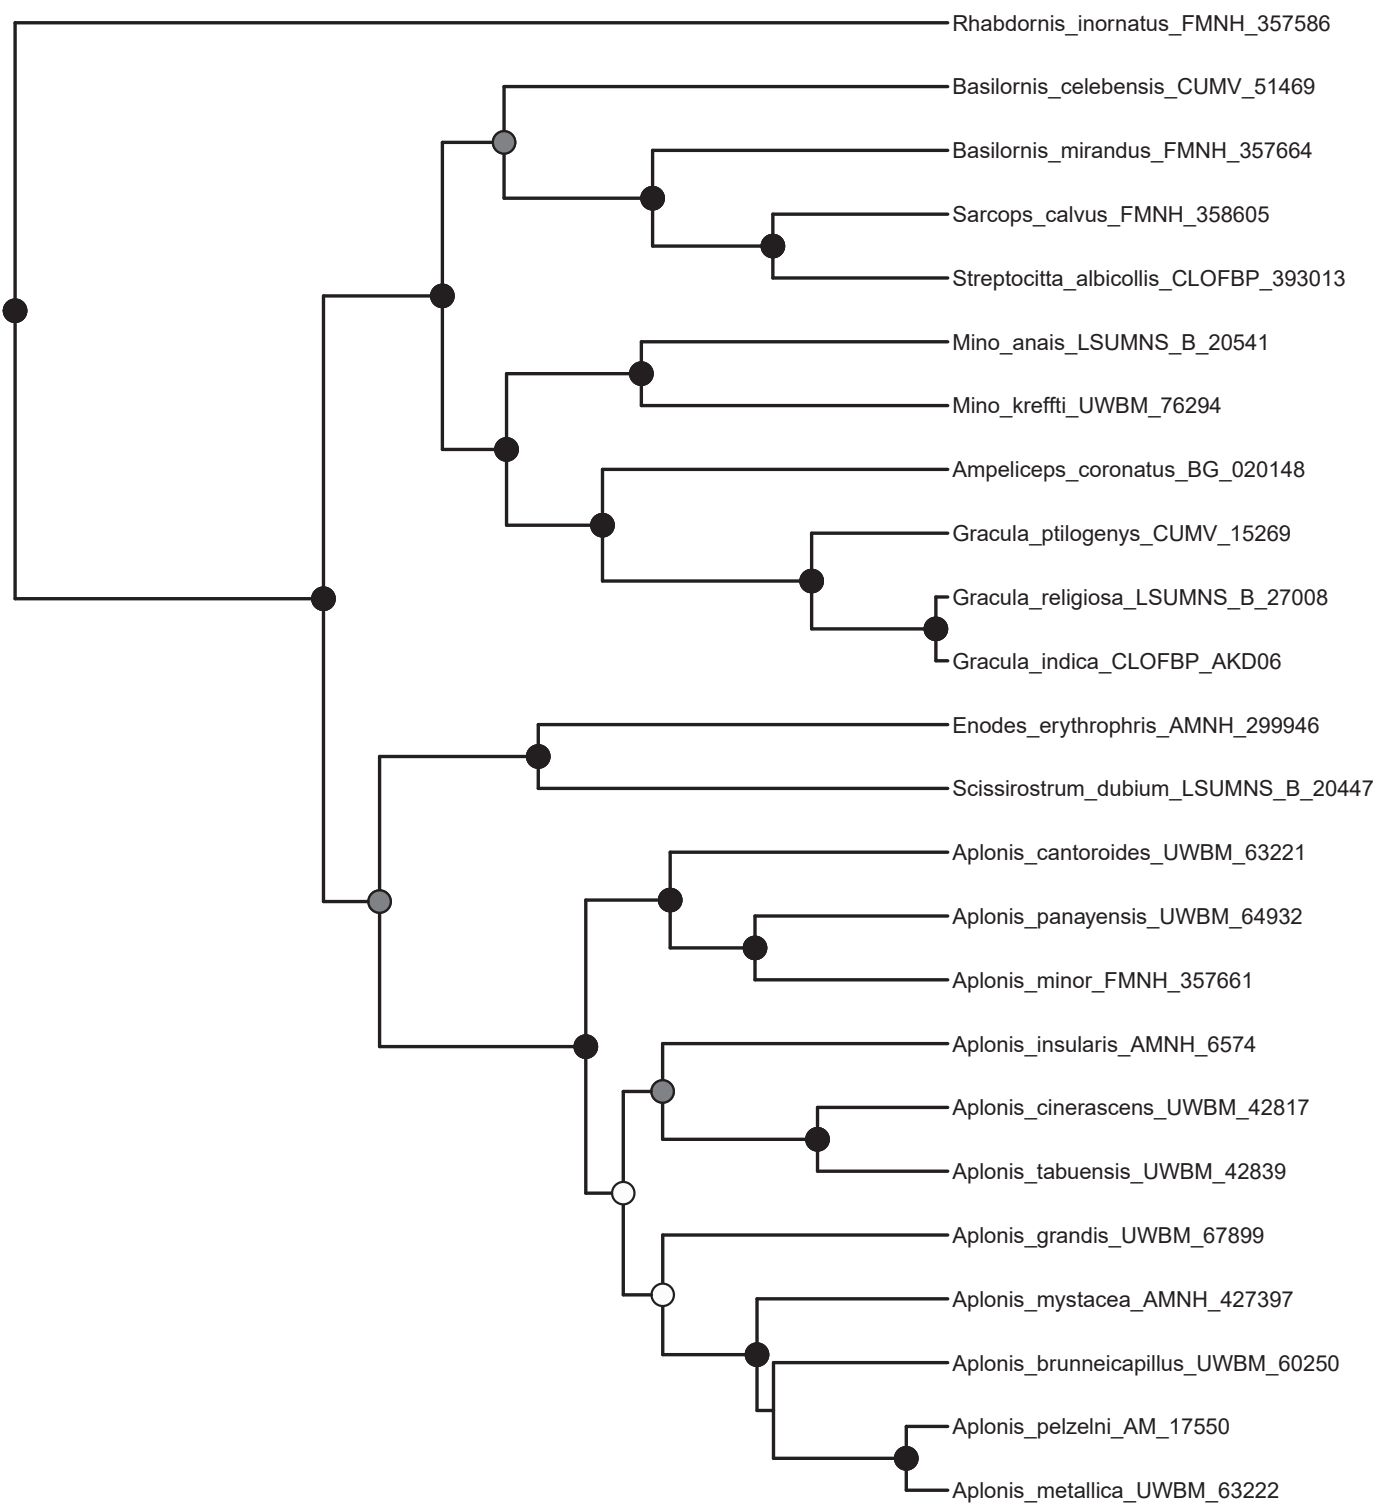

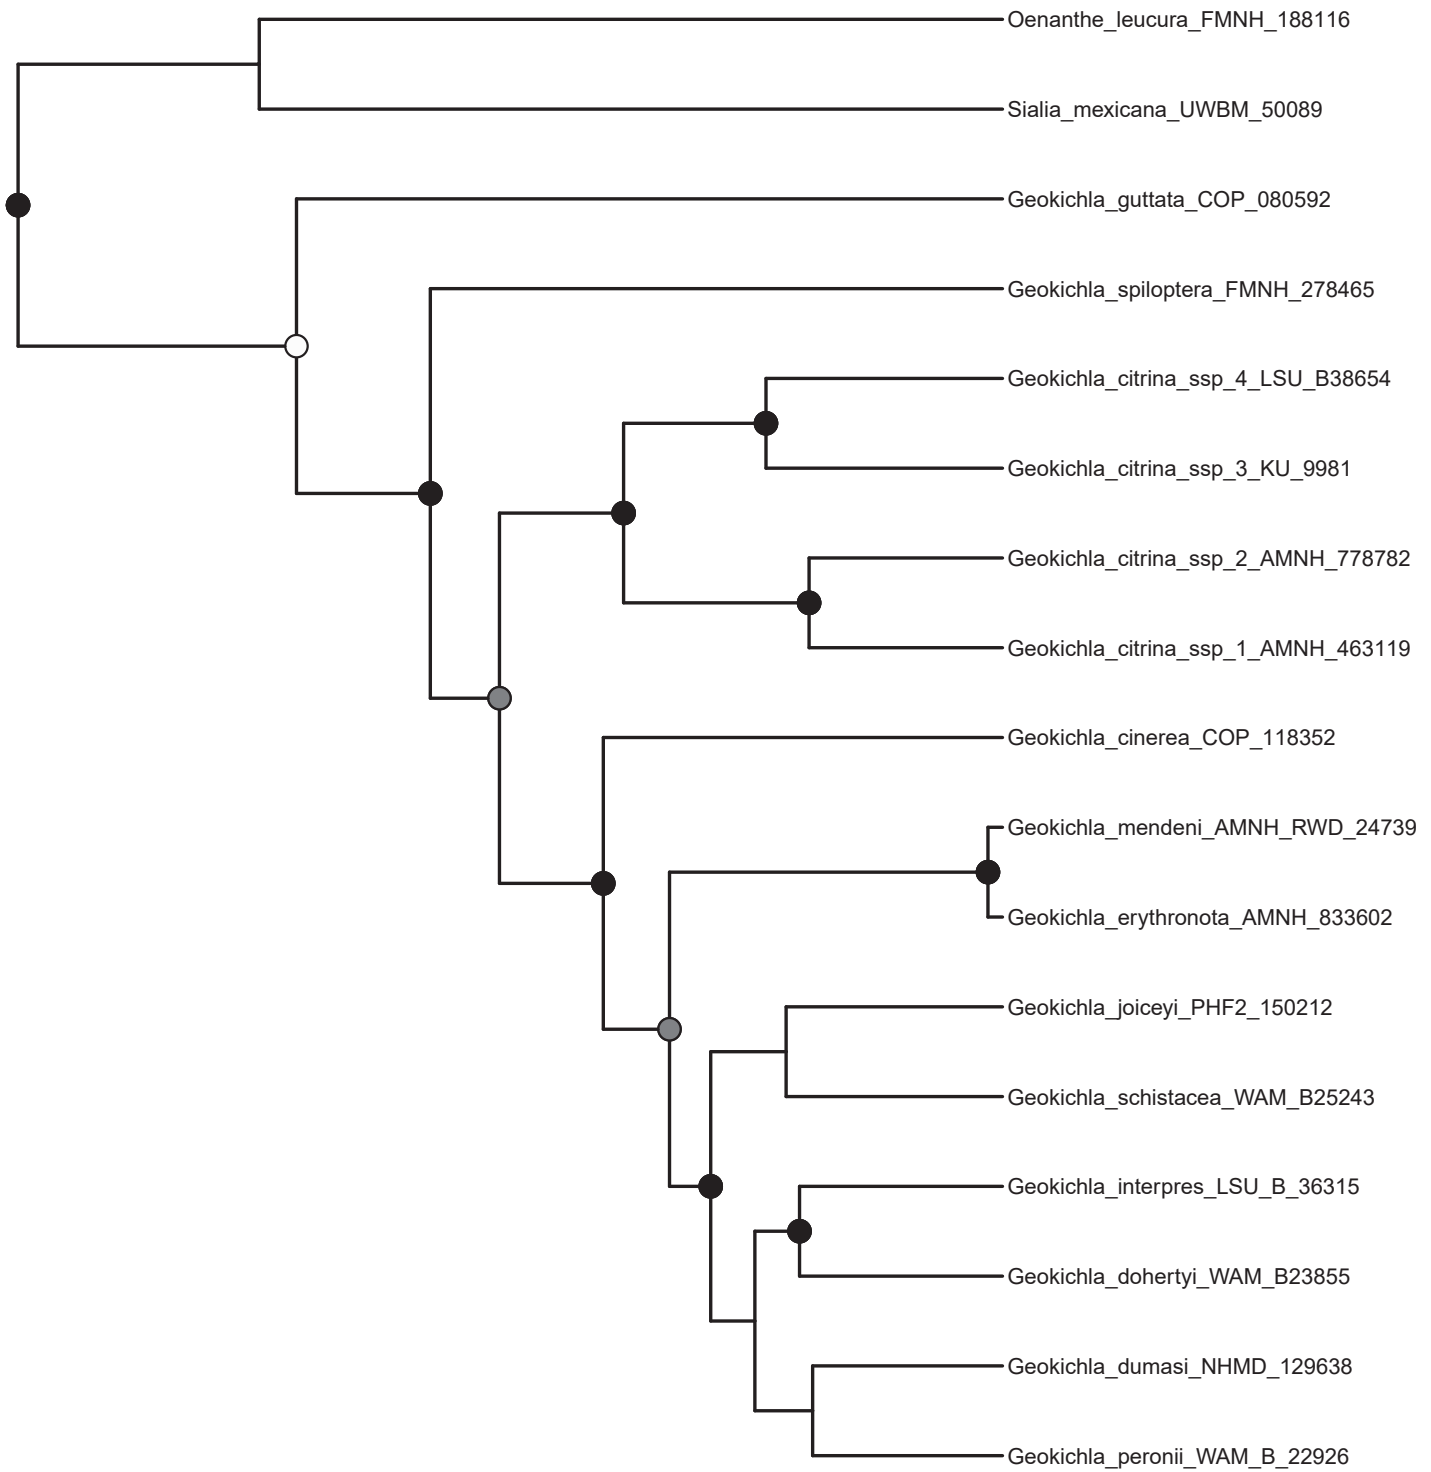

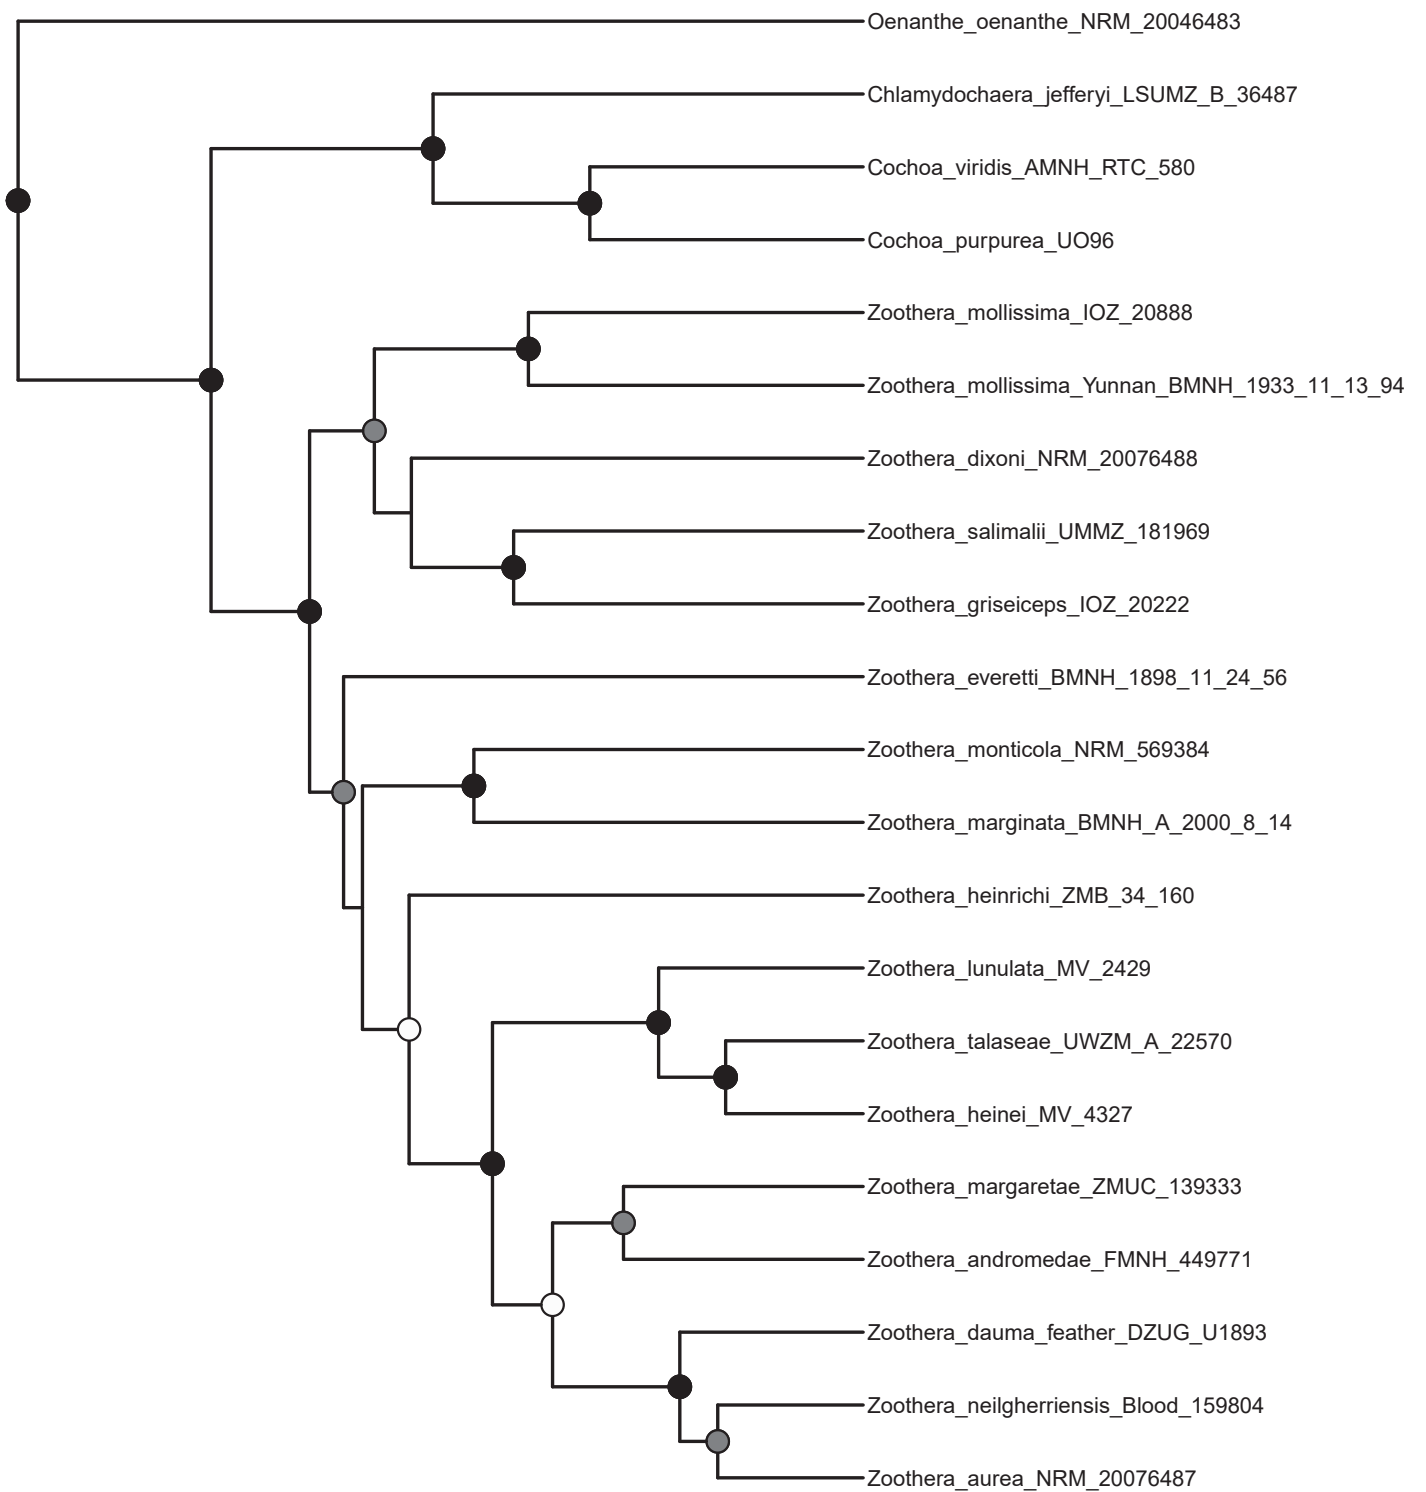

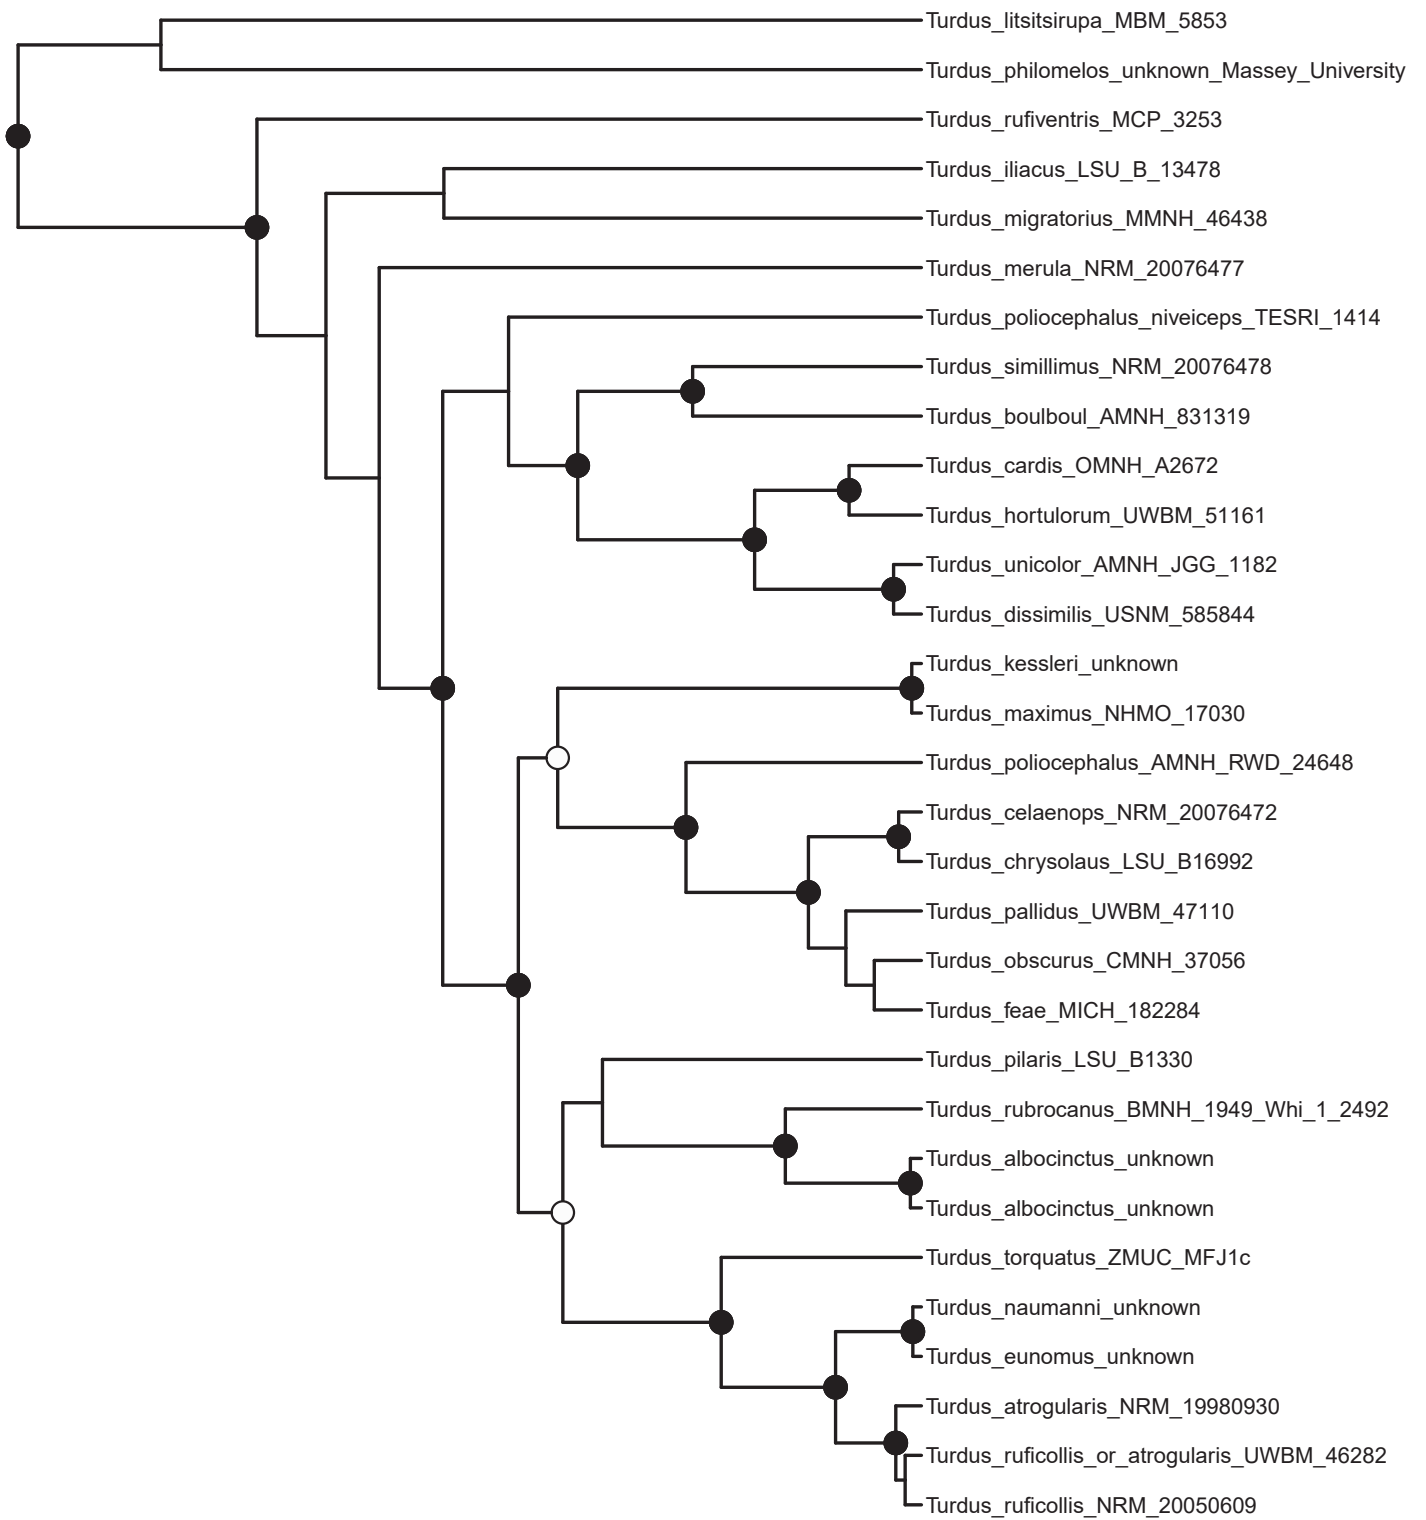

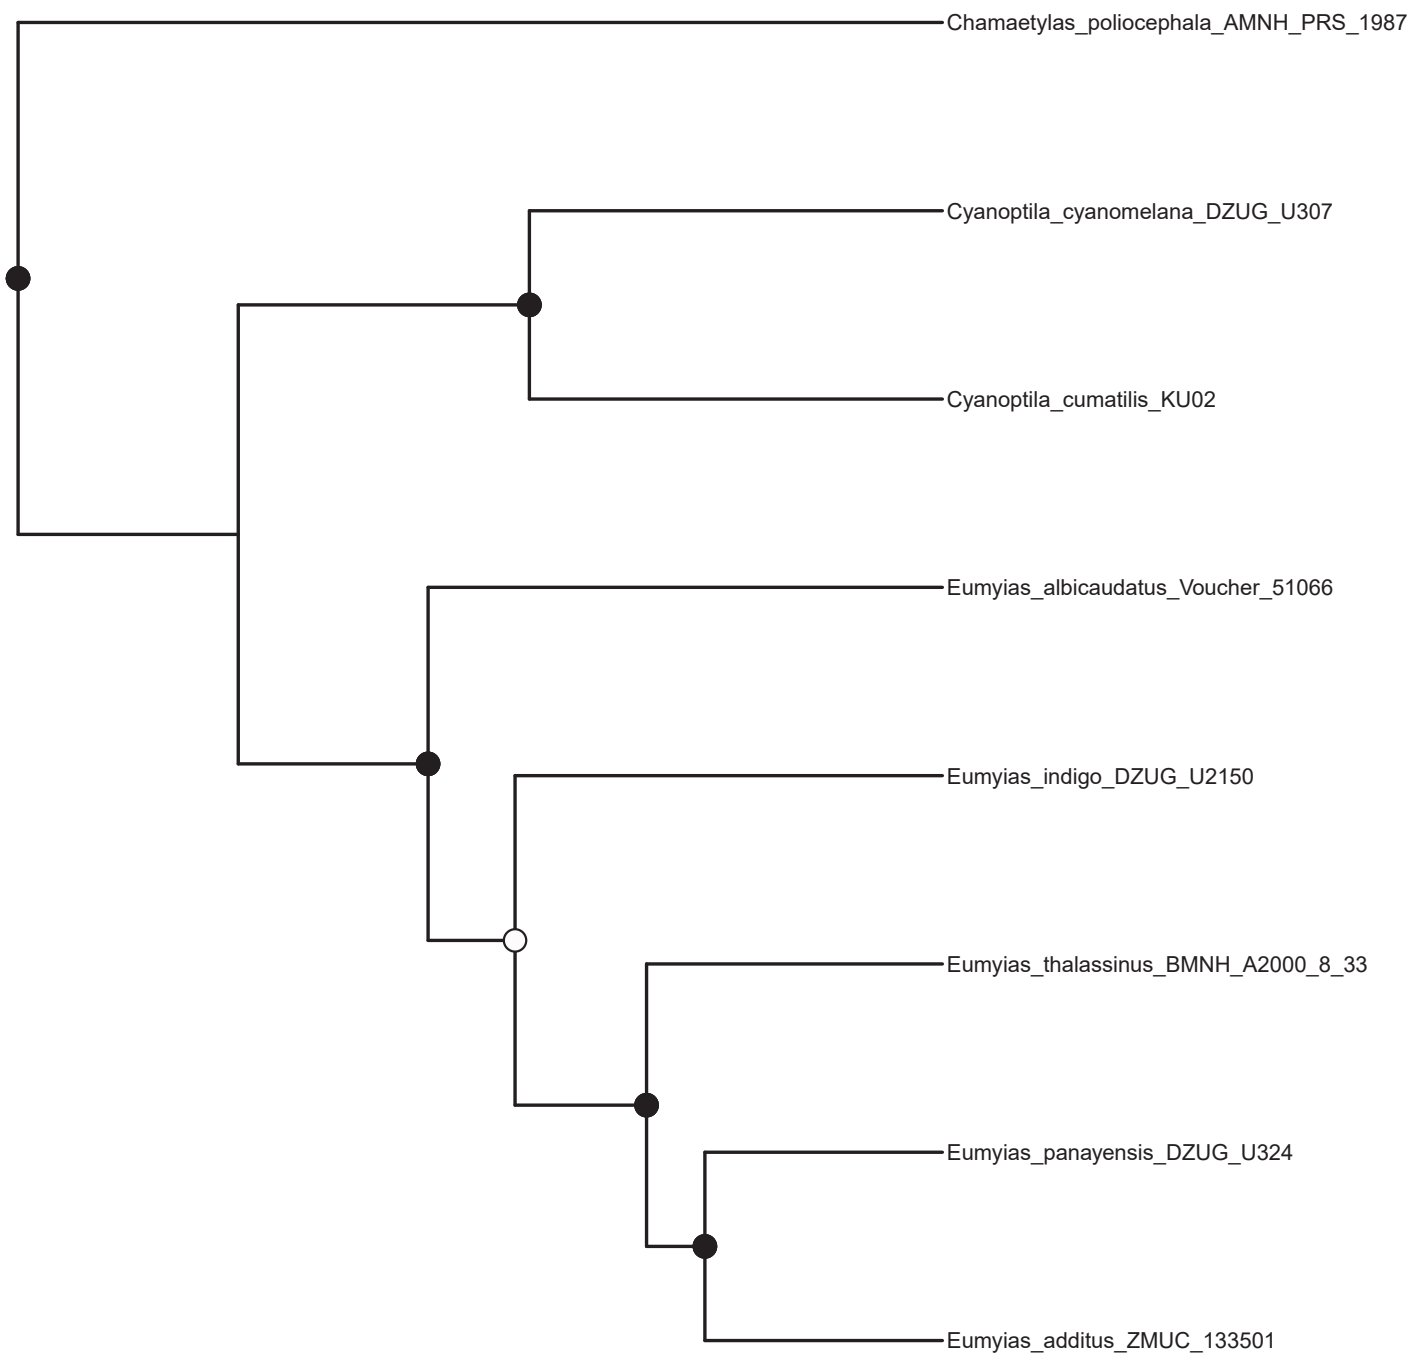

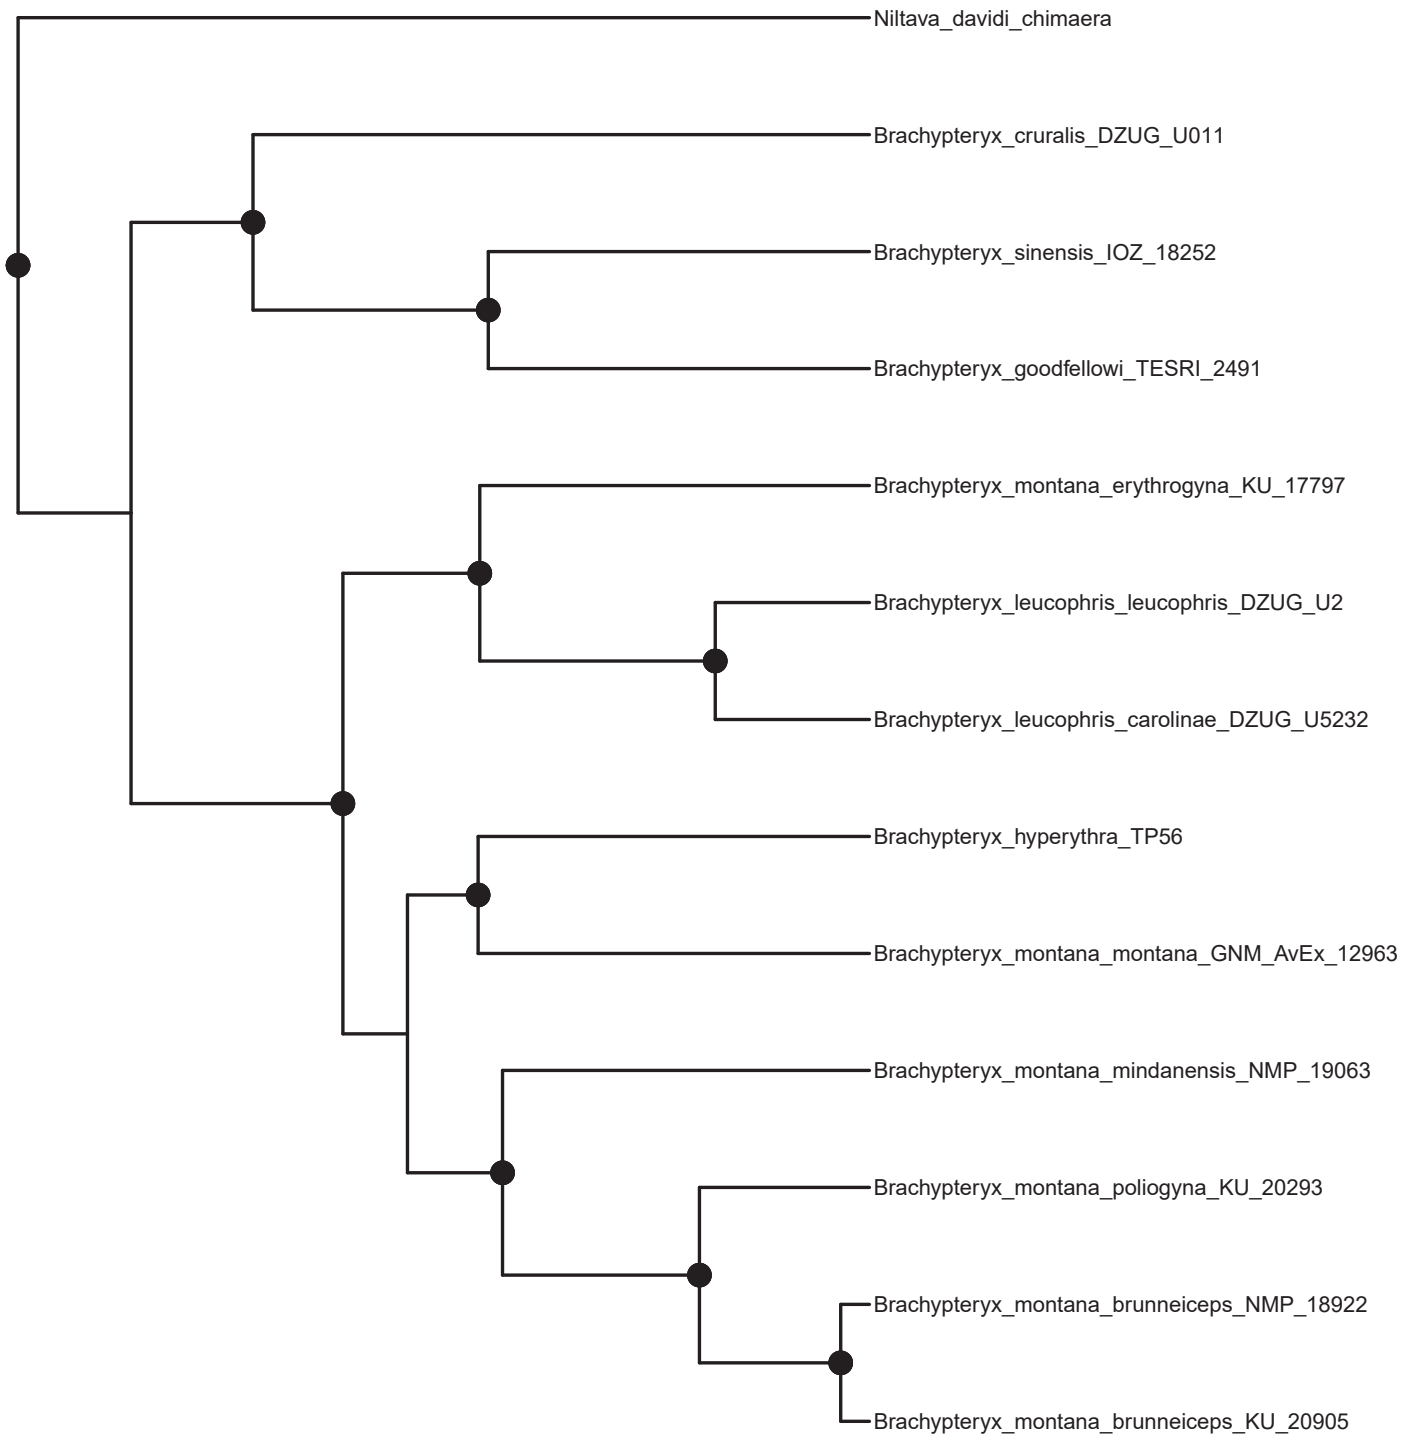

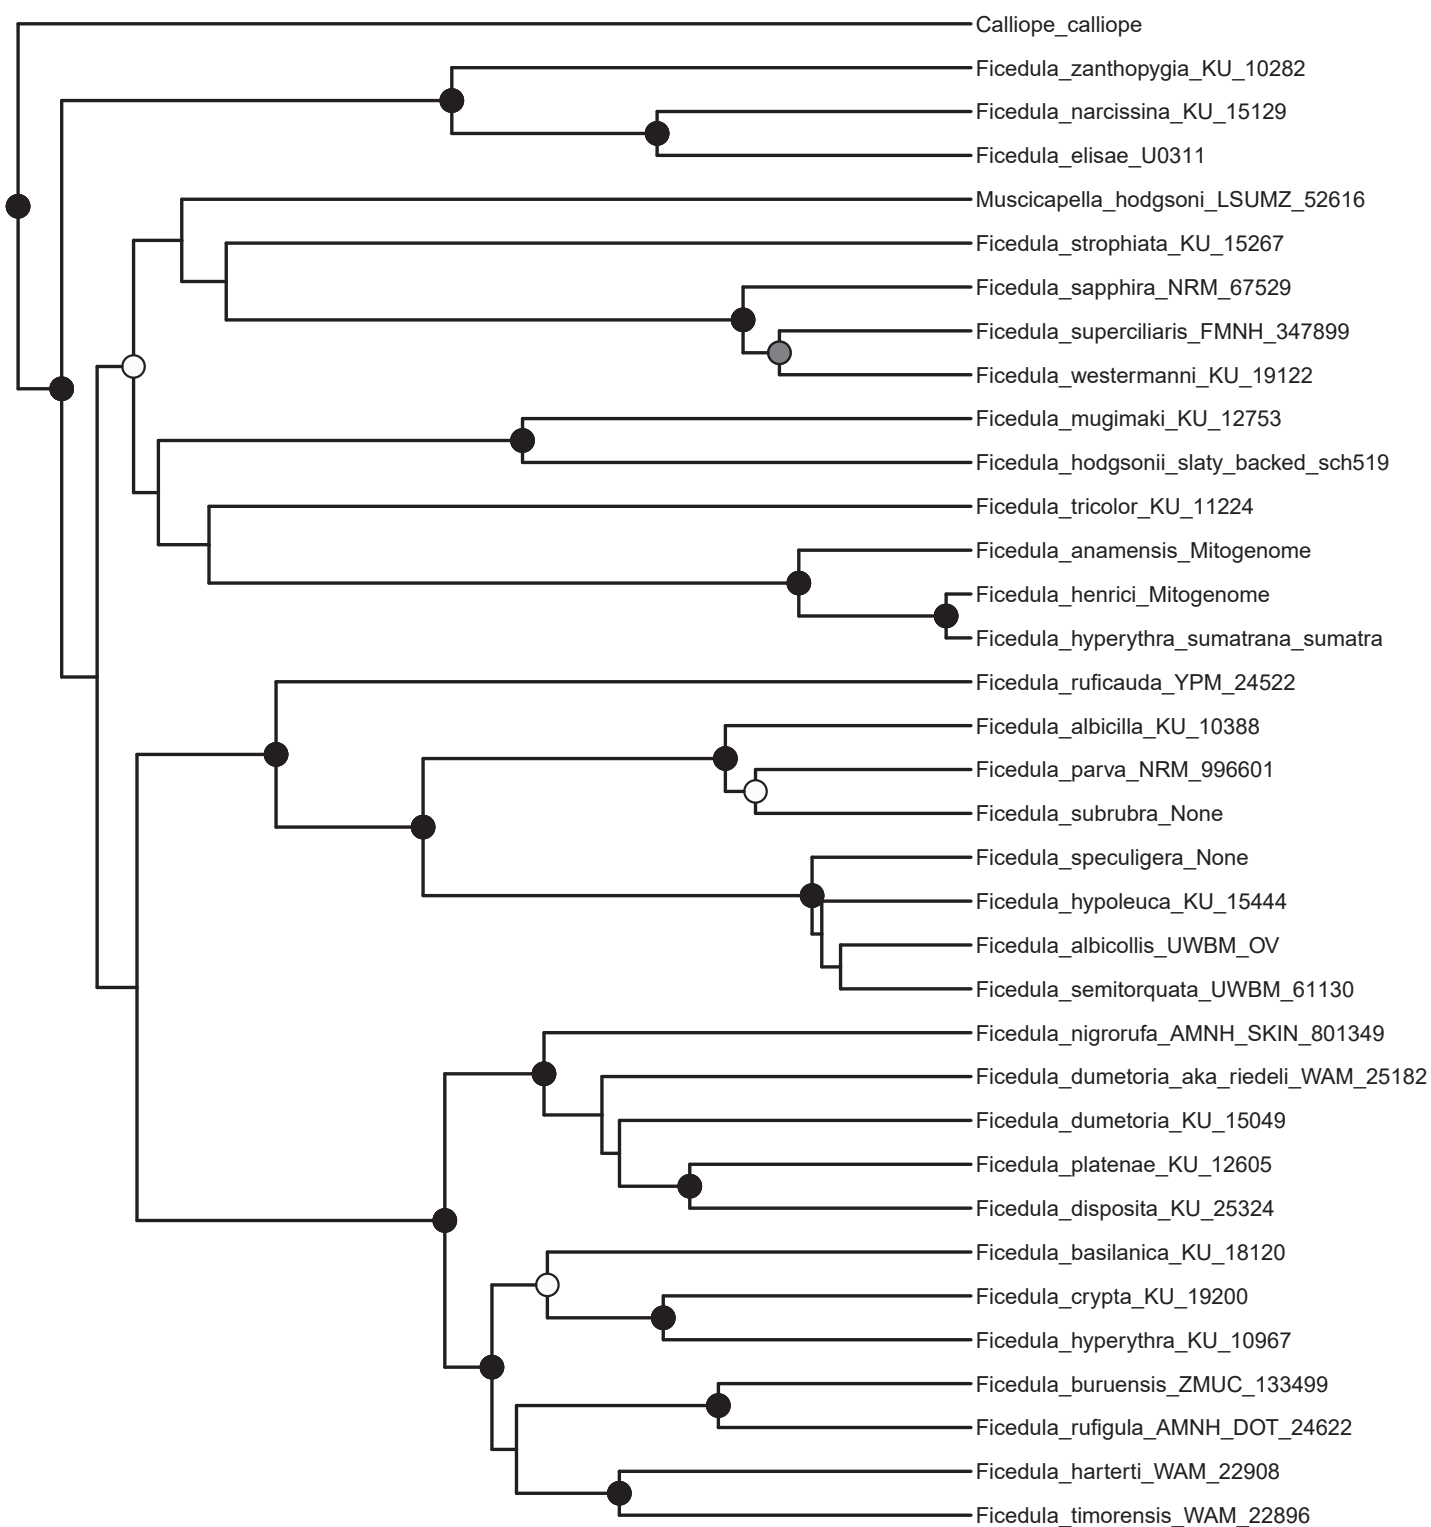

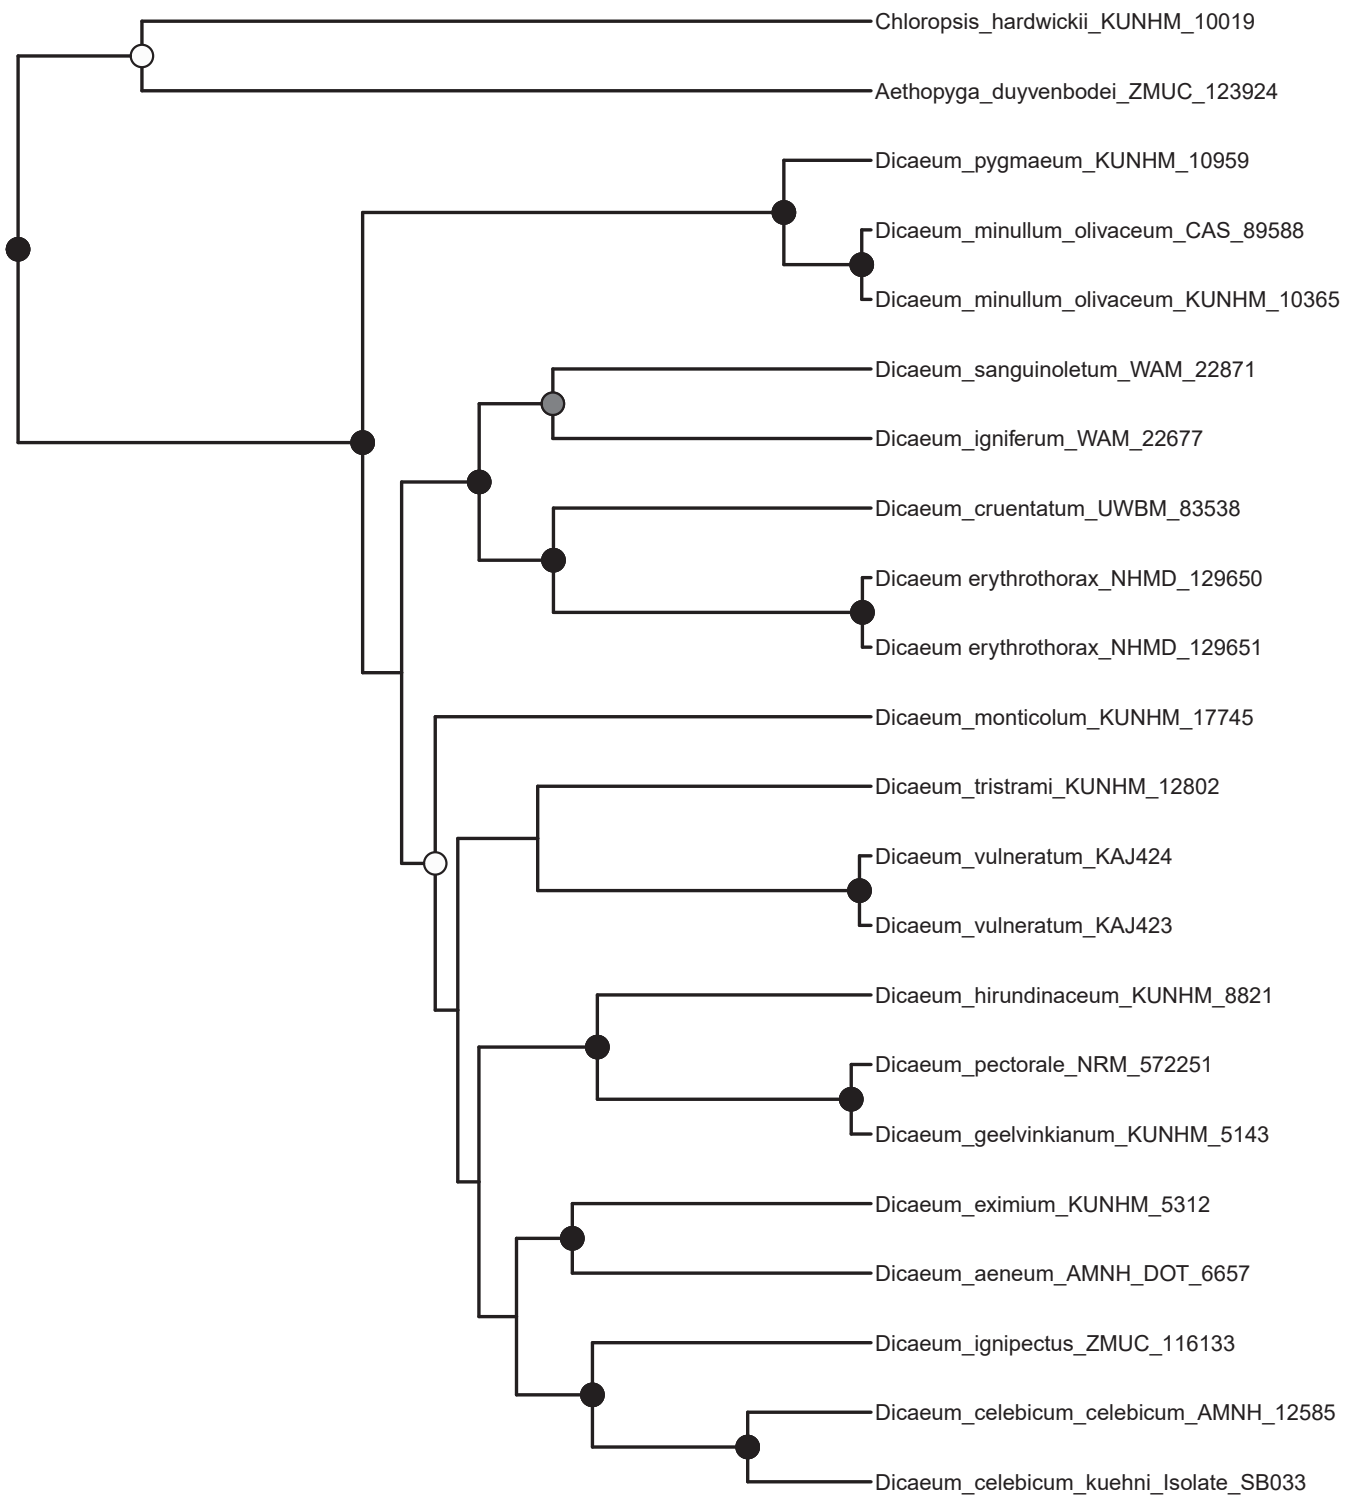



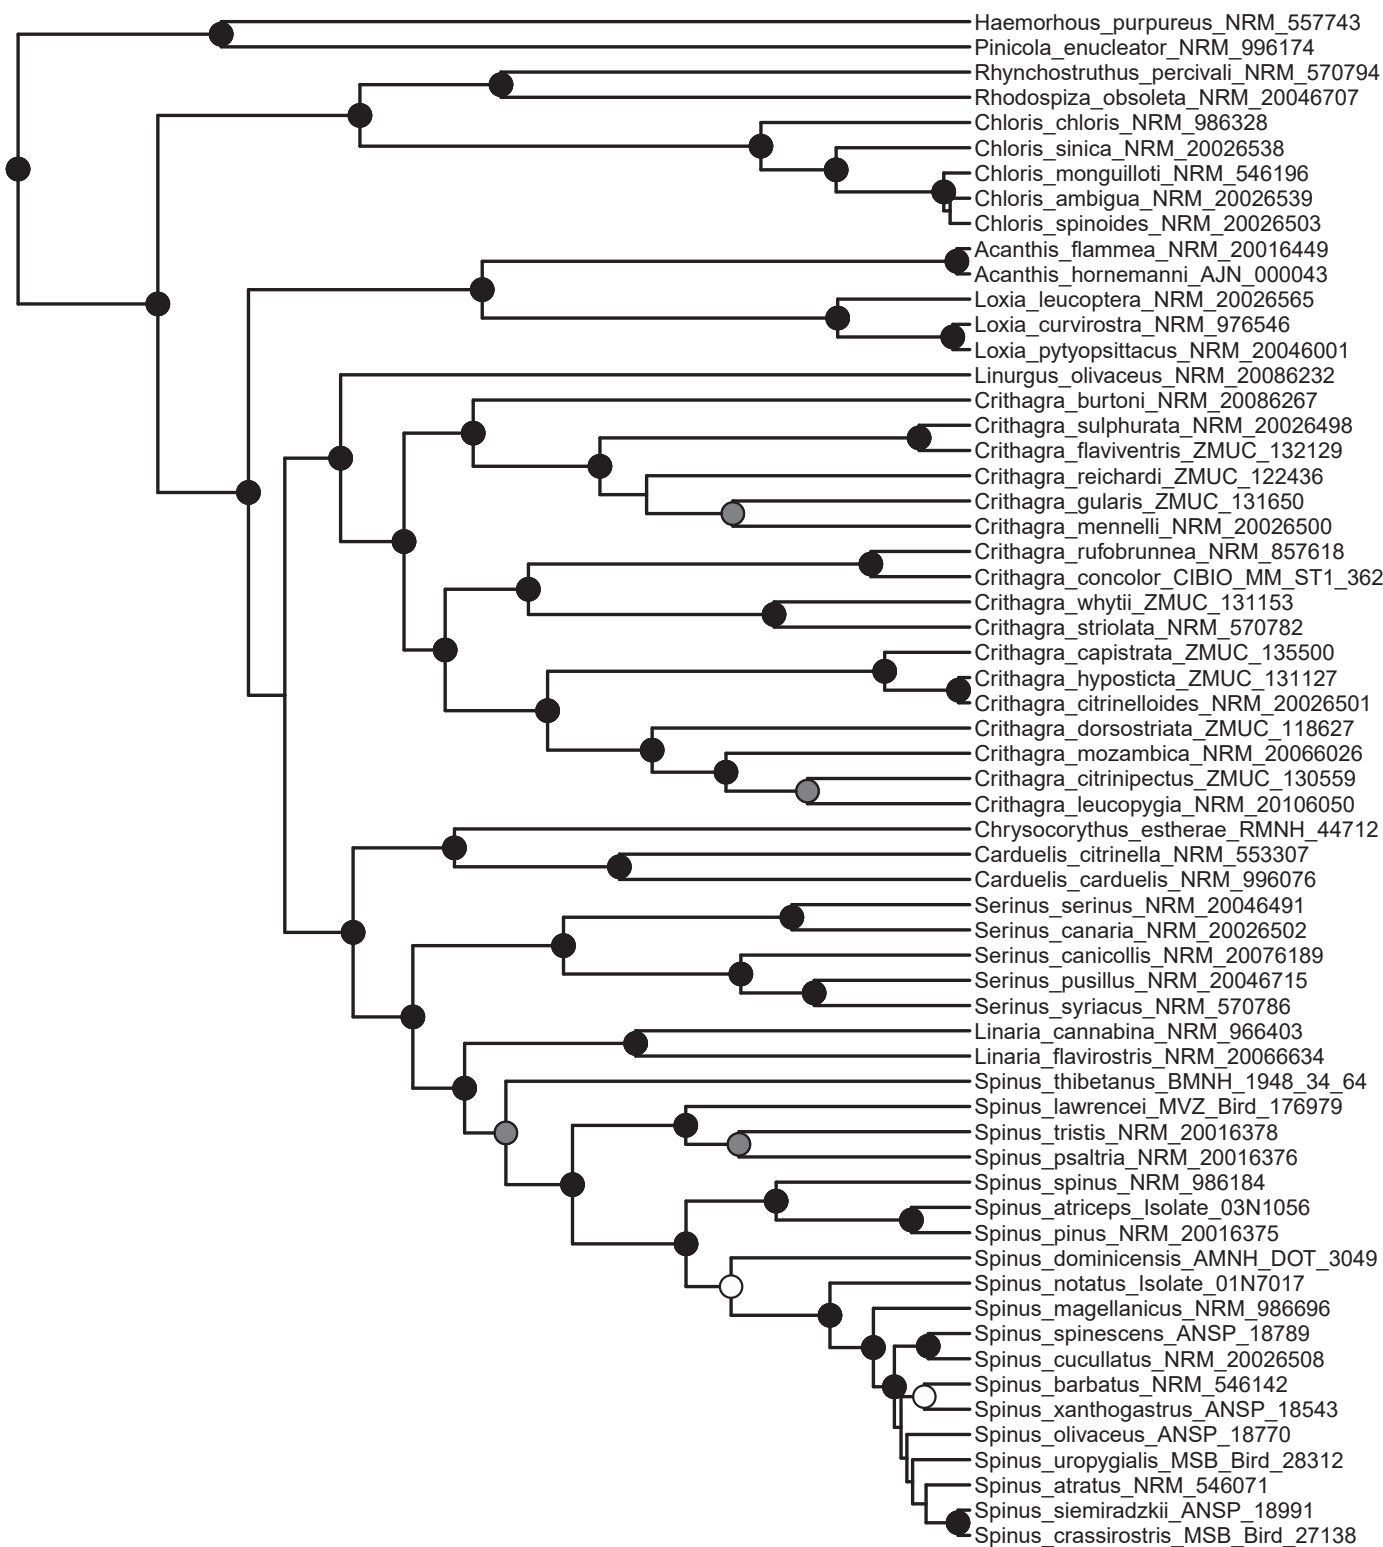

Supplement: 41467_2023_43964_MOESM5_ESM.pdf [file 41467_2023_43964_MOESM5_ESM.pdf]
