# Supplementary material for: The formation of the Indo-Pacific montane avifauna
Source: PubMed Central journal article supplement (PMC10713610; doi:10.1038/s41467-023-43964-y), 2023-12-11

## Supplementary Material for

The formation of the Indo-Pacific montane avifauna

Andrew Hart Reeve, Jonathan David Kennedy, Jose Martin Pujolar, Bent Petersen, Mozes P. K. Blom, Per Alström, Tri Haryoko, Per G. P. Ericson, Martin Irestedt, Johan A. A. Nylander, and Knud Andreas Jønsson

**Supplementary Data 4.** Ancestral state reconstructions of geographic range (pp. 3–25), elevational range (pp. 26–48), and migratory behavior (pp. 49–71).

### Contents:

Map of biogeographic regions as defined for this study - p. 2

Meliphagidae - pp. 3, 26, 49

Campephagidae - pp. 4, 27, 50

Pachycephalidae - pp. 5, 28, 51

Rhipiduridae A (*Rhipidura*) - pp. 6, 29, 52

Rhipiduridae B (Lamproliidae) - pp. 7, 30, 53

Corvidae - pp. 8, 31, 54

Petroicidae A (*Microeca*) - pp. 9, 32, 55

Petroicidae B (*Petroica*) - pp. 10, 33, 56

Stenostiridae - pp. 11, 34, 57

Pnoepygidae - pp. 12, 35, 58

Cettiidae - pp. 13, 36, 59

Phylloscopidae - pp. 14, 37, 60

Locustellidae - pp. 15, 38, 61

Sturnidae - pp. 16, 39, 62

Turdidae A (*Geokichla*) - pp. 17, 40, 63

Turdidae B (*Zoothera*) - pp. 18, 41, 64

Turdidae C (*Turdus*) - pp. 19, 42, 65

Muscicapidae A (*Eumyias*) - pp. 20, 43, 66

Muscicapidae B (*Brachypteryx*) - pp. 21, 44, 67

Muscicapidae C (*Ficedula*) - pp. 22, 45, 68

Dicaeidae - pp. 23, 46, 69

Motacillidae - pp. 24, 47, 70

Fringillidae - pp. 25, 48, 71

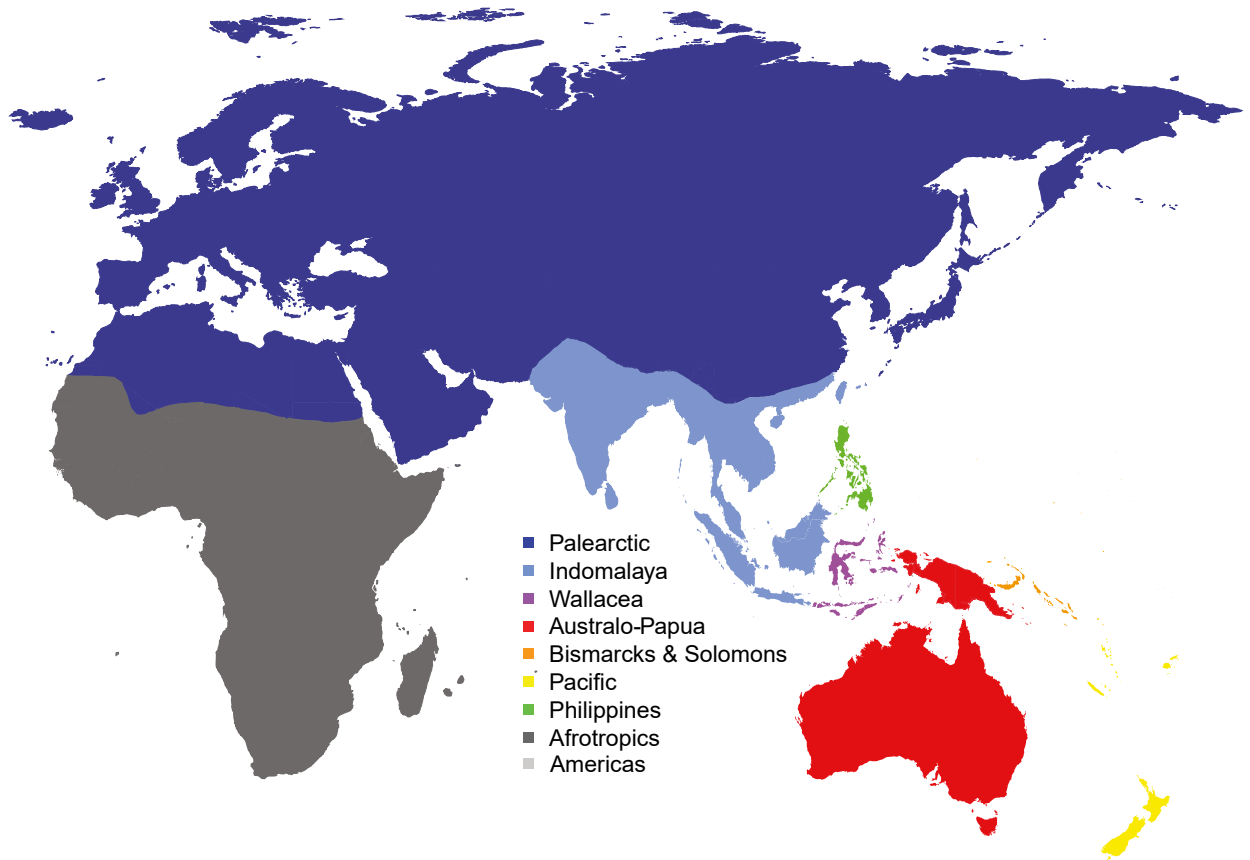

Biogeographic regions as defined for this study. The Americas are not shown.



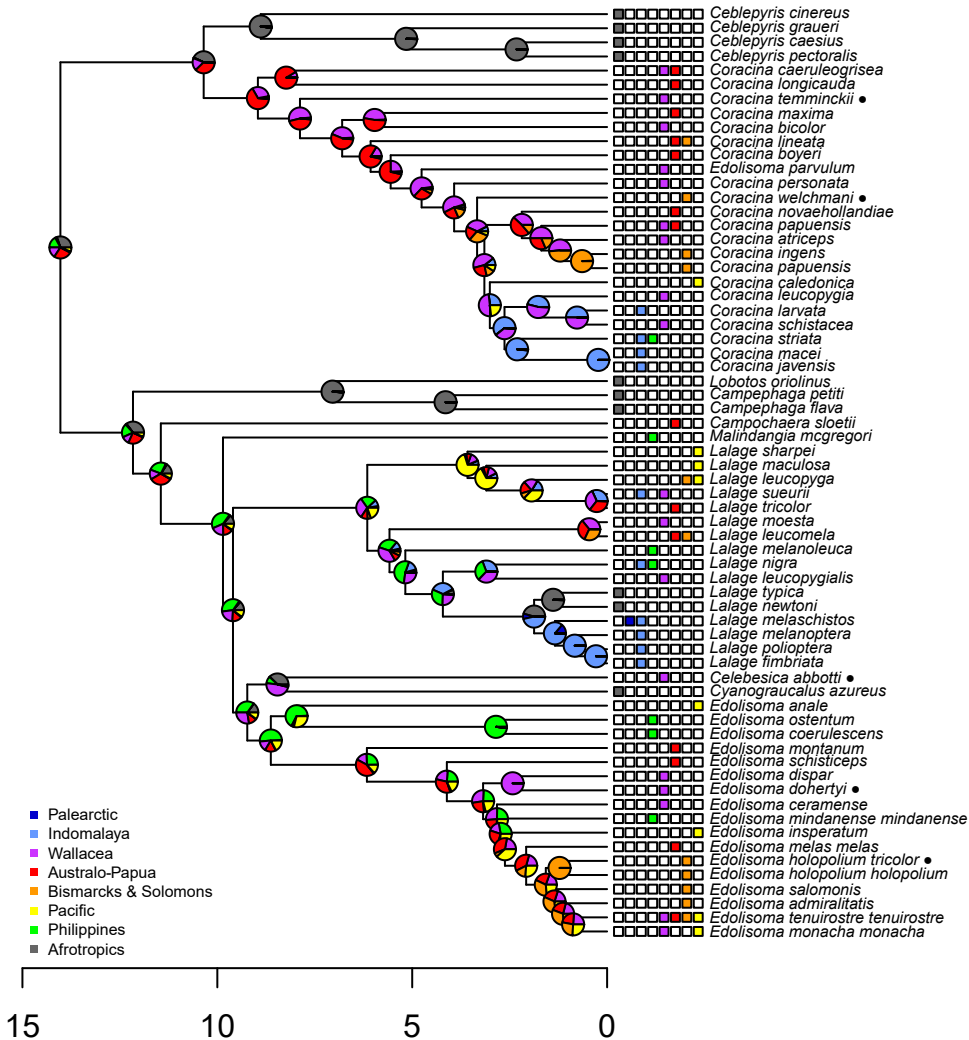

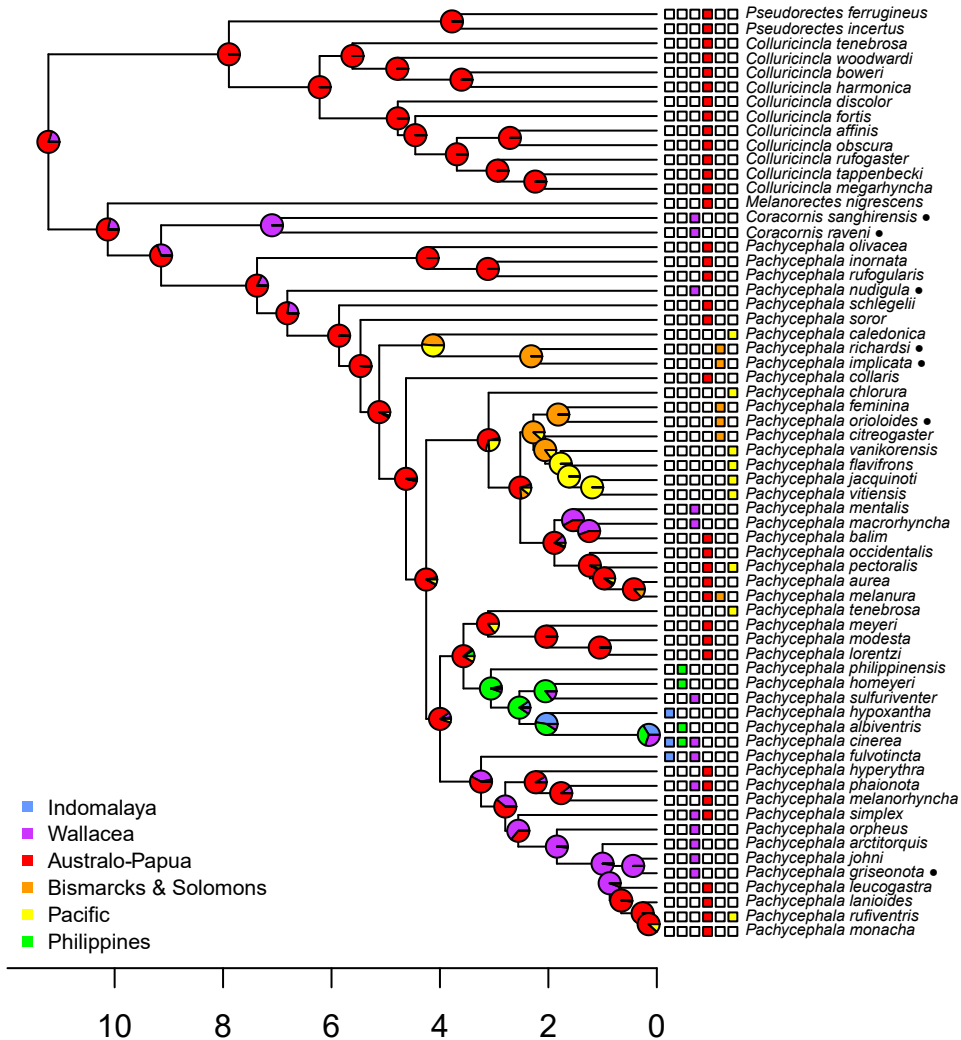

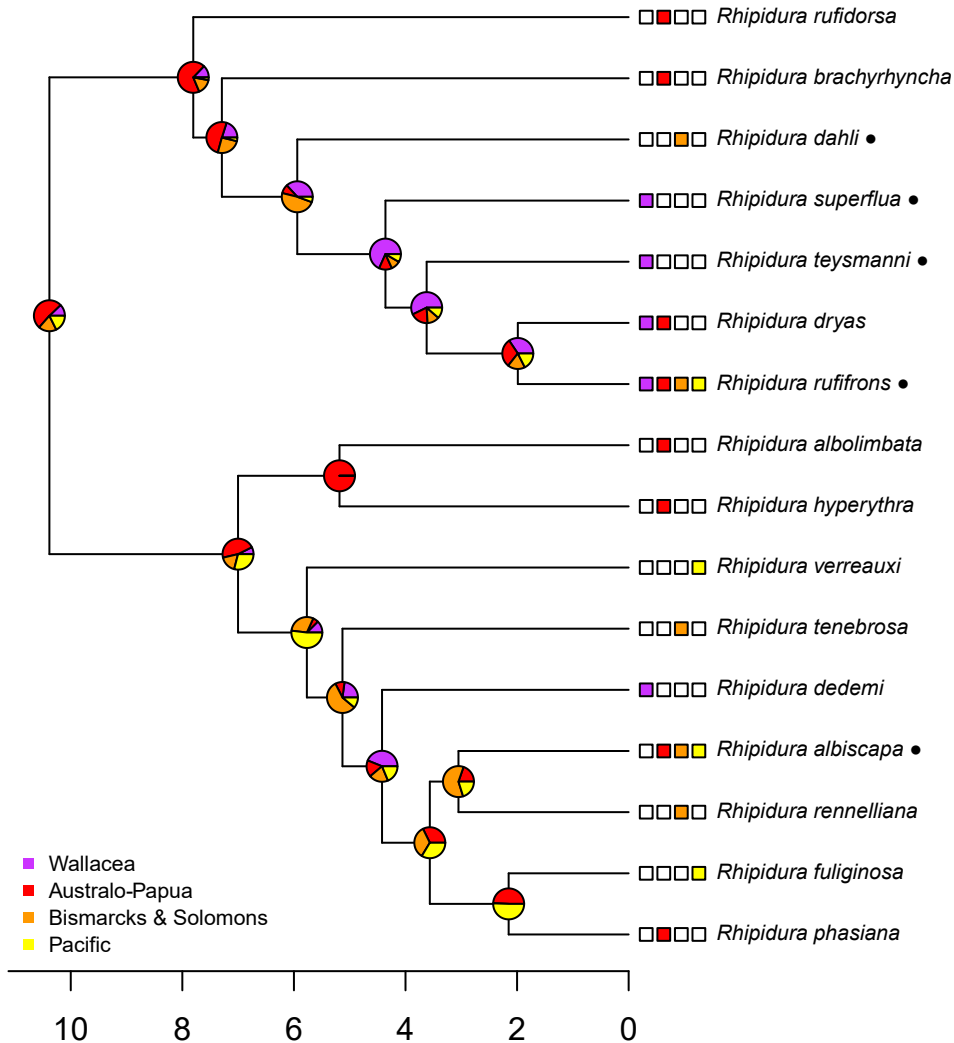

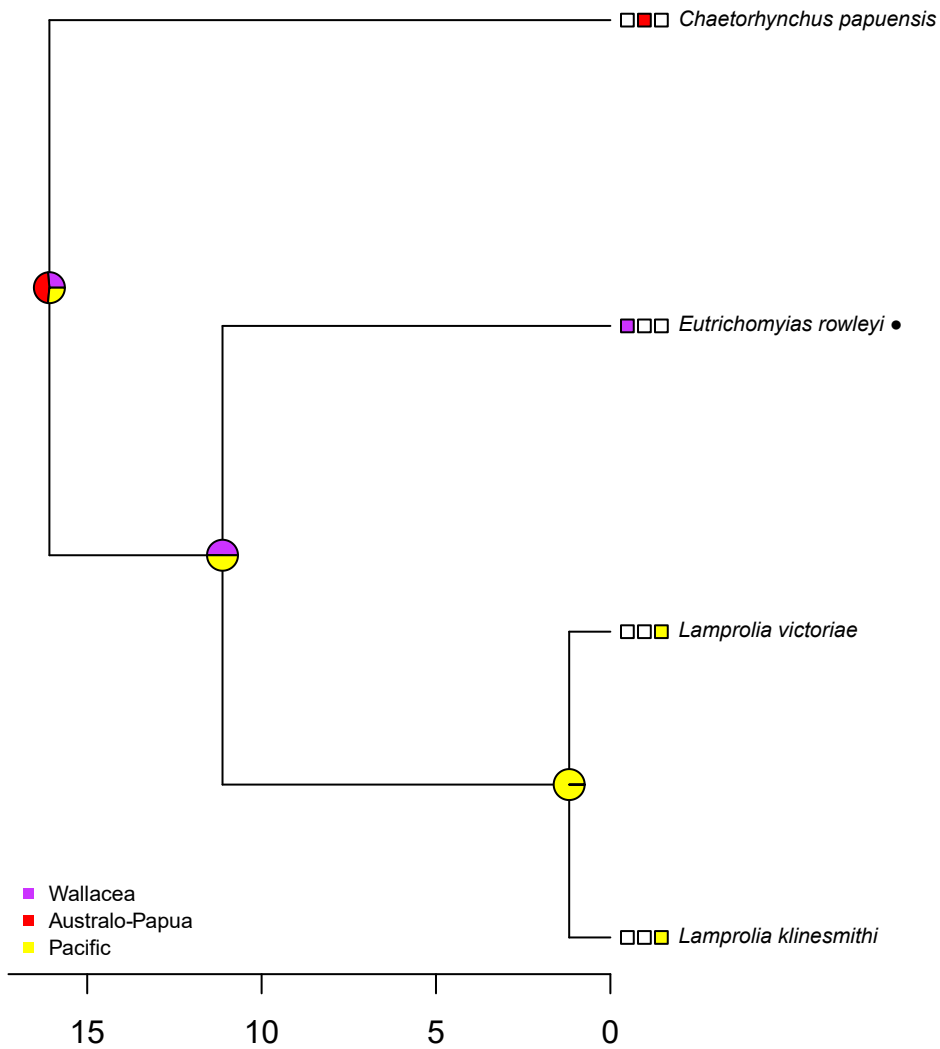

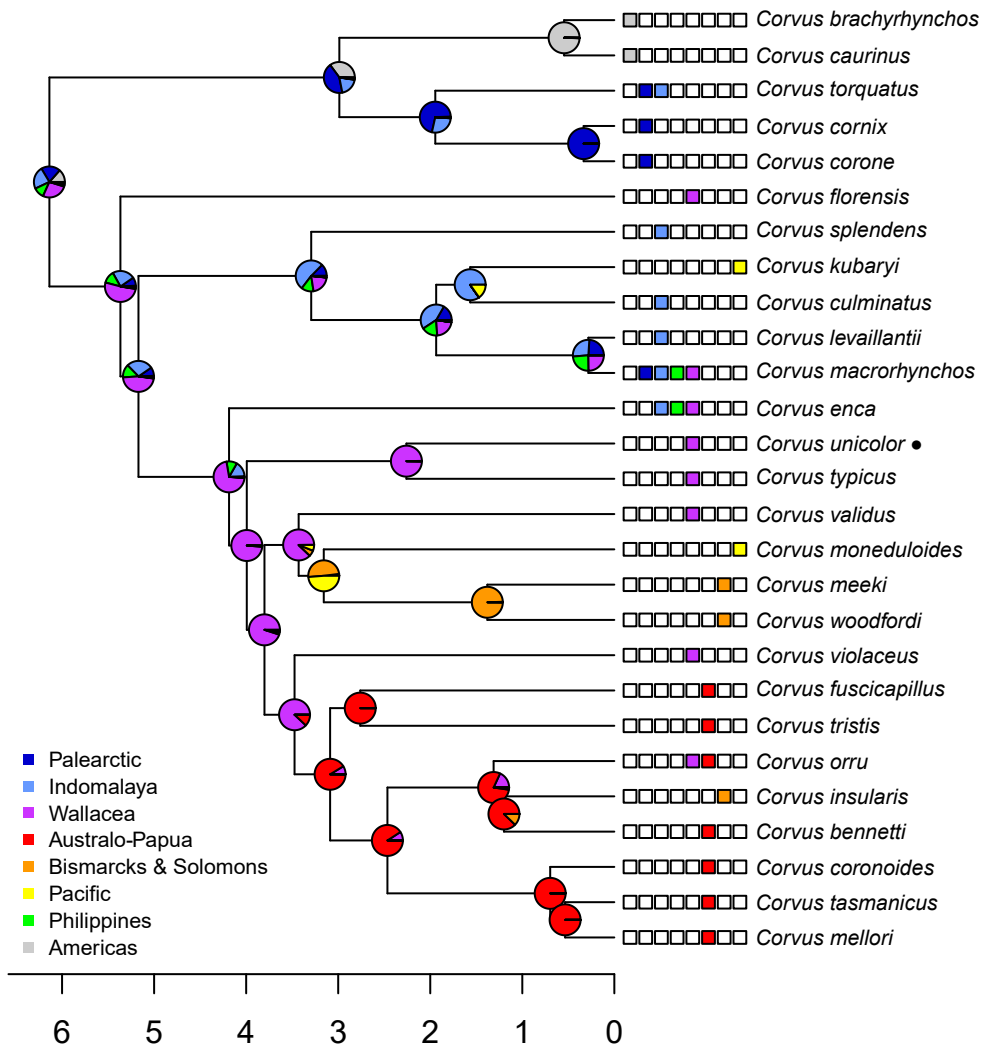



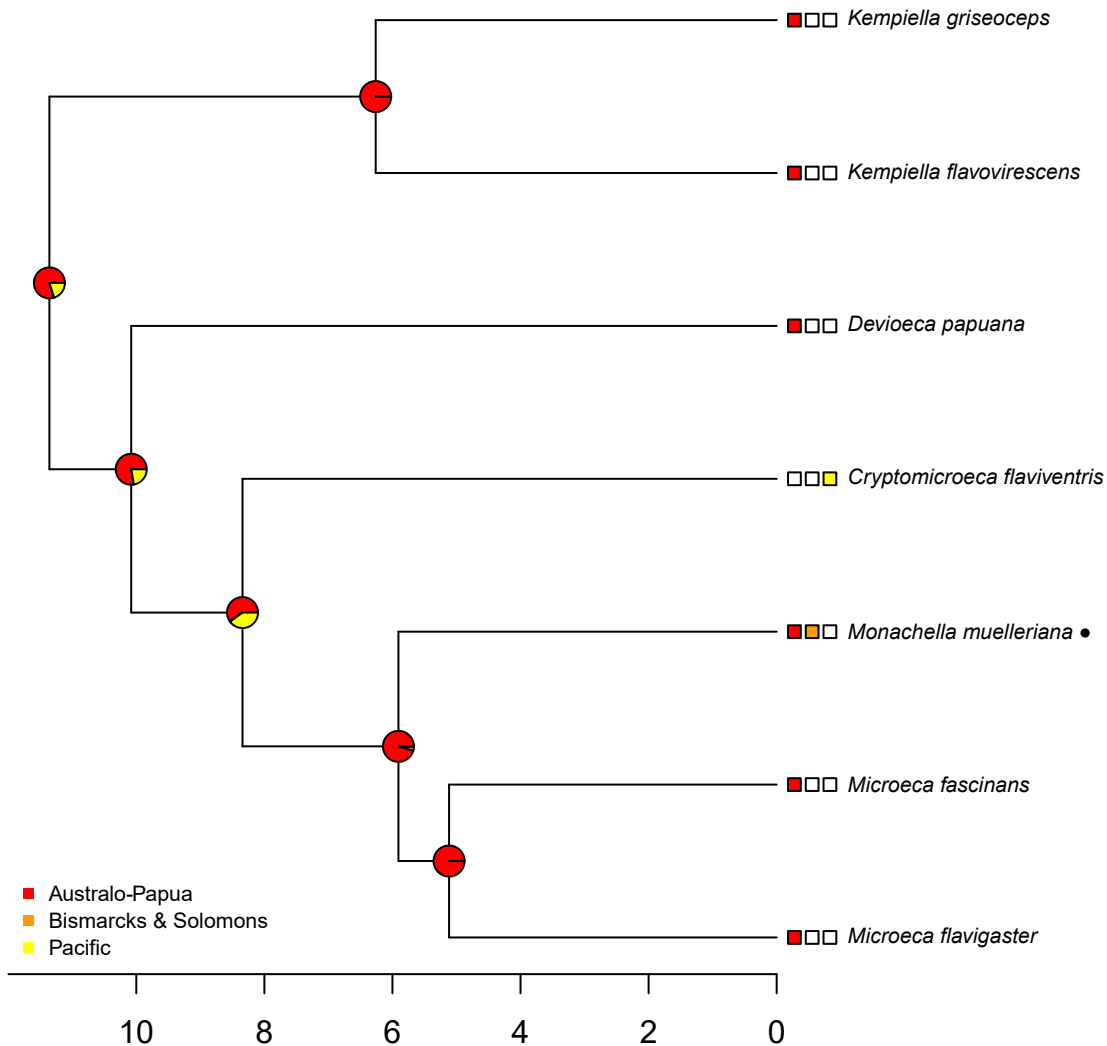

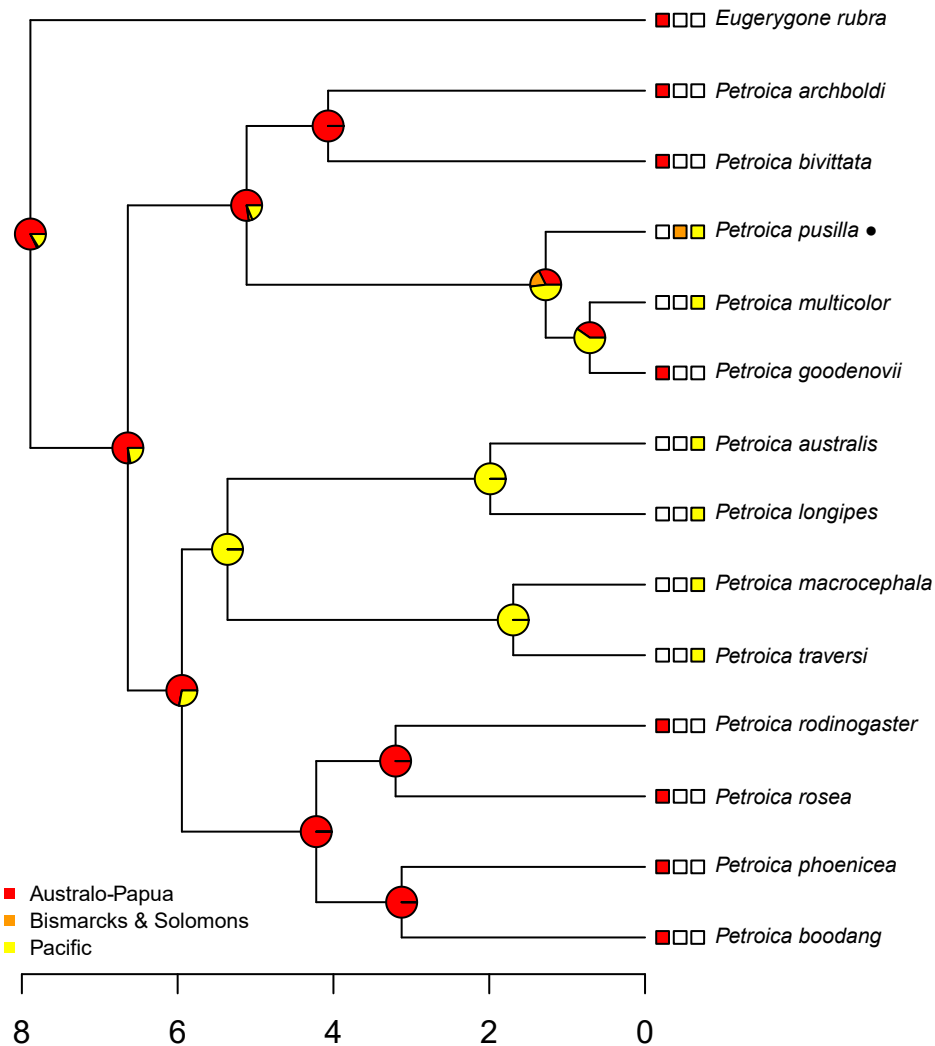

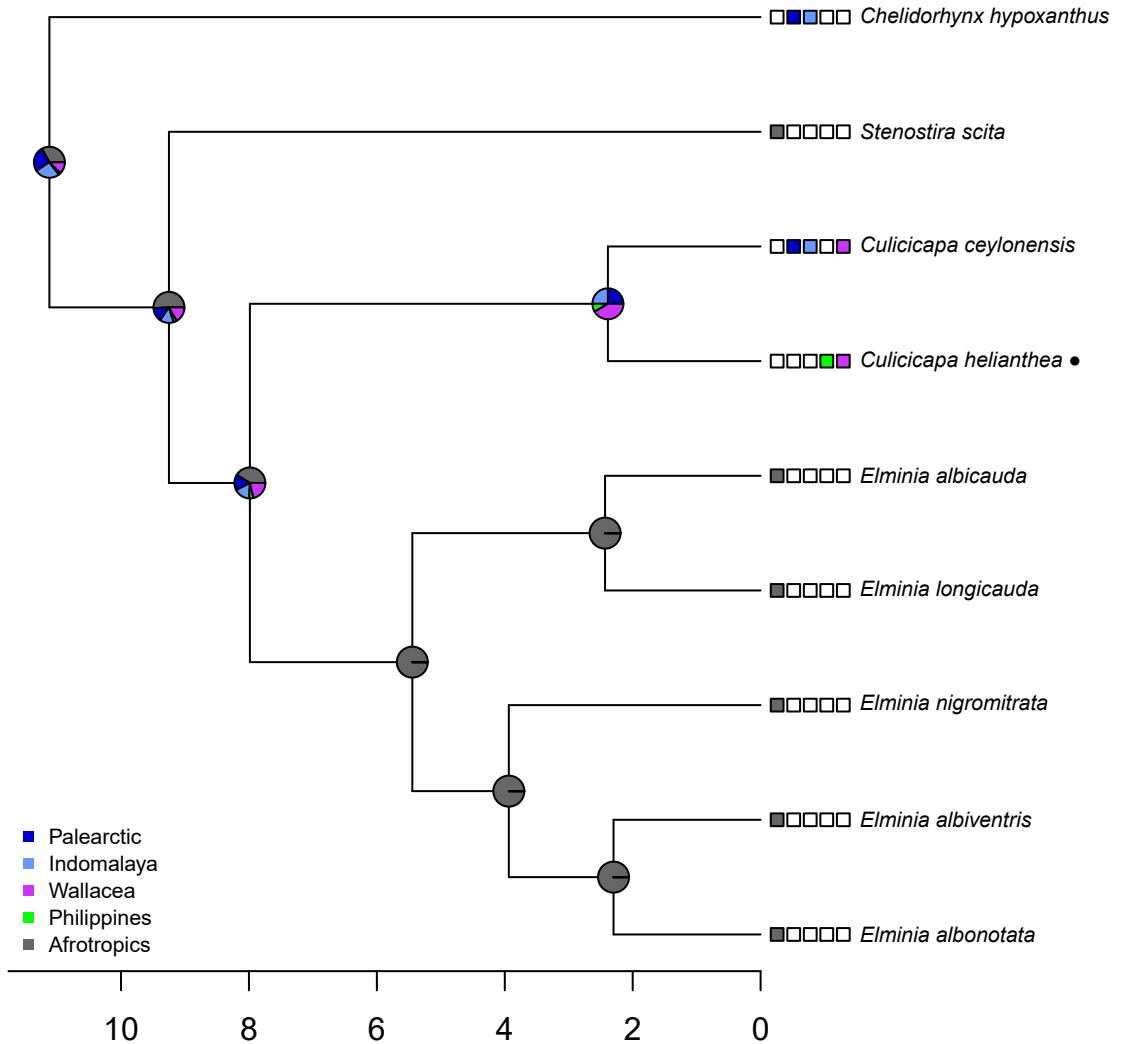

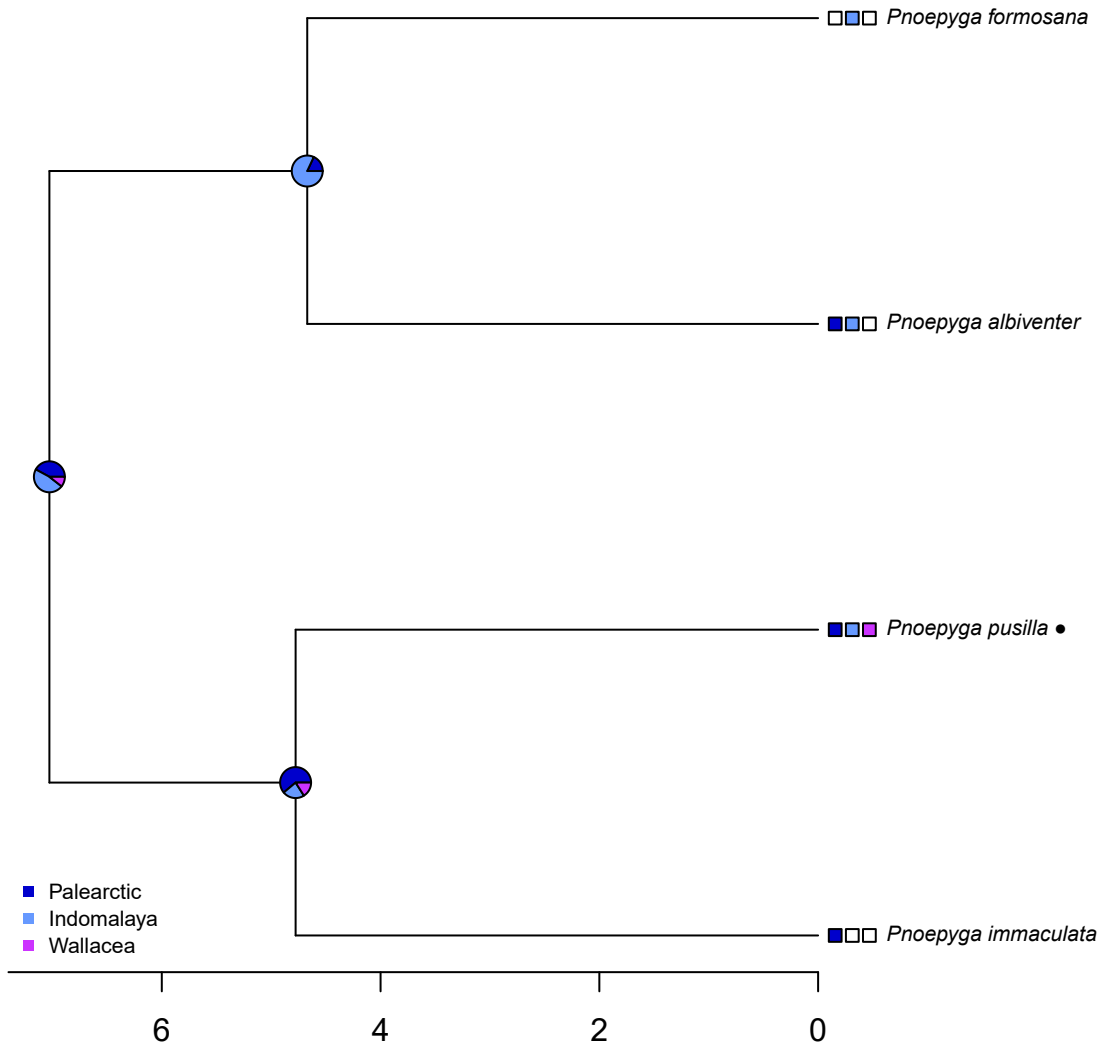

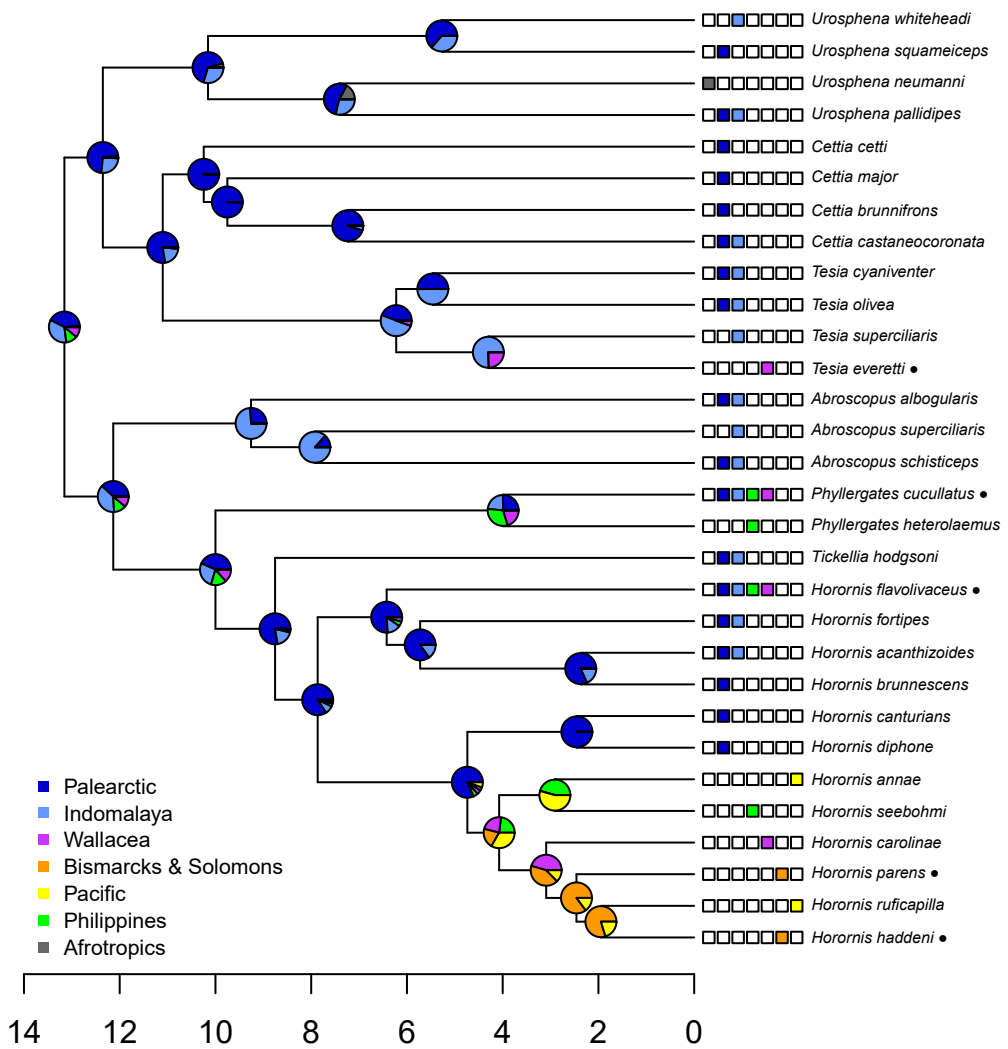

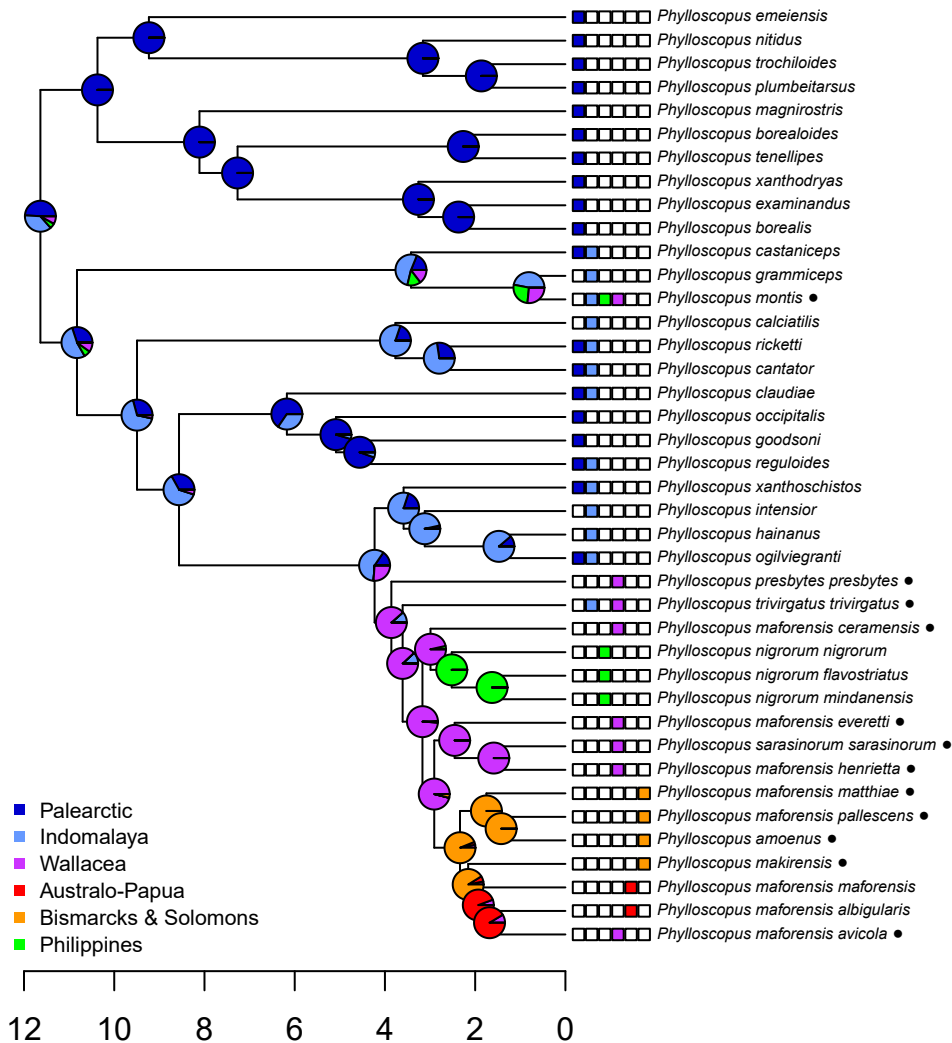

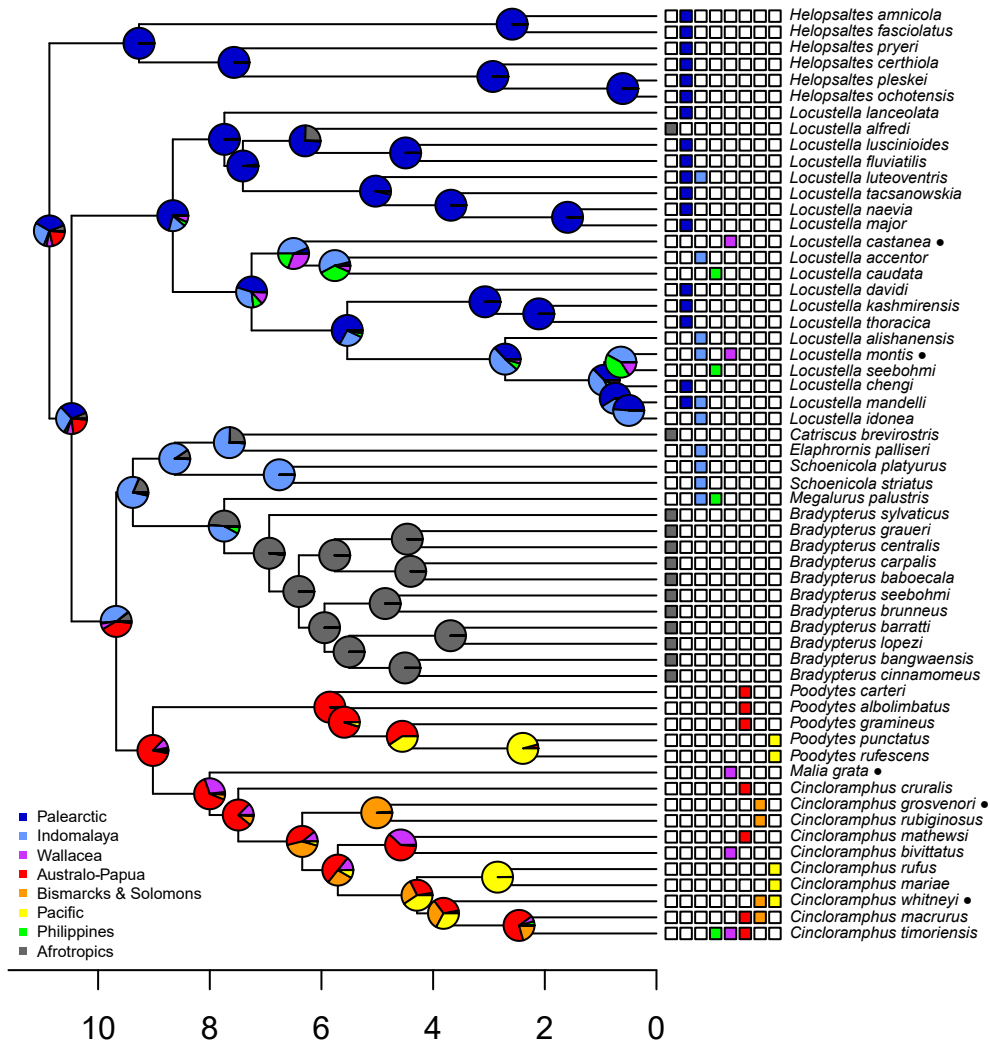

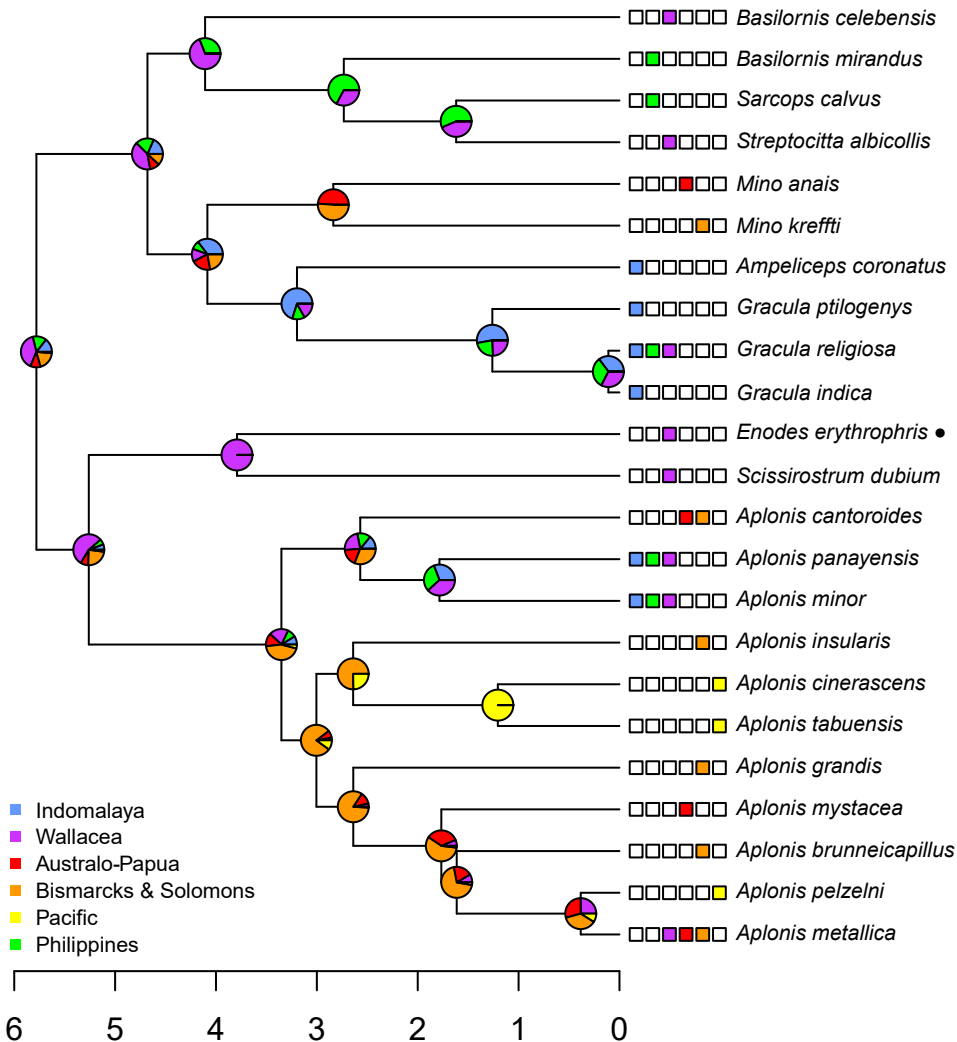



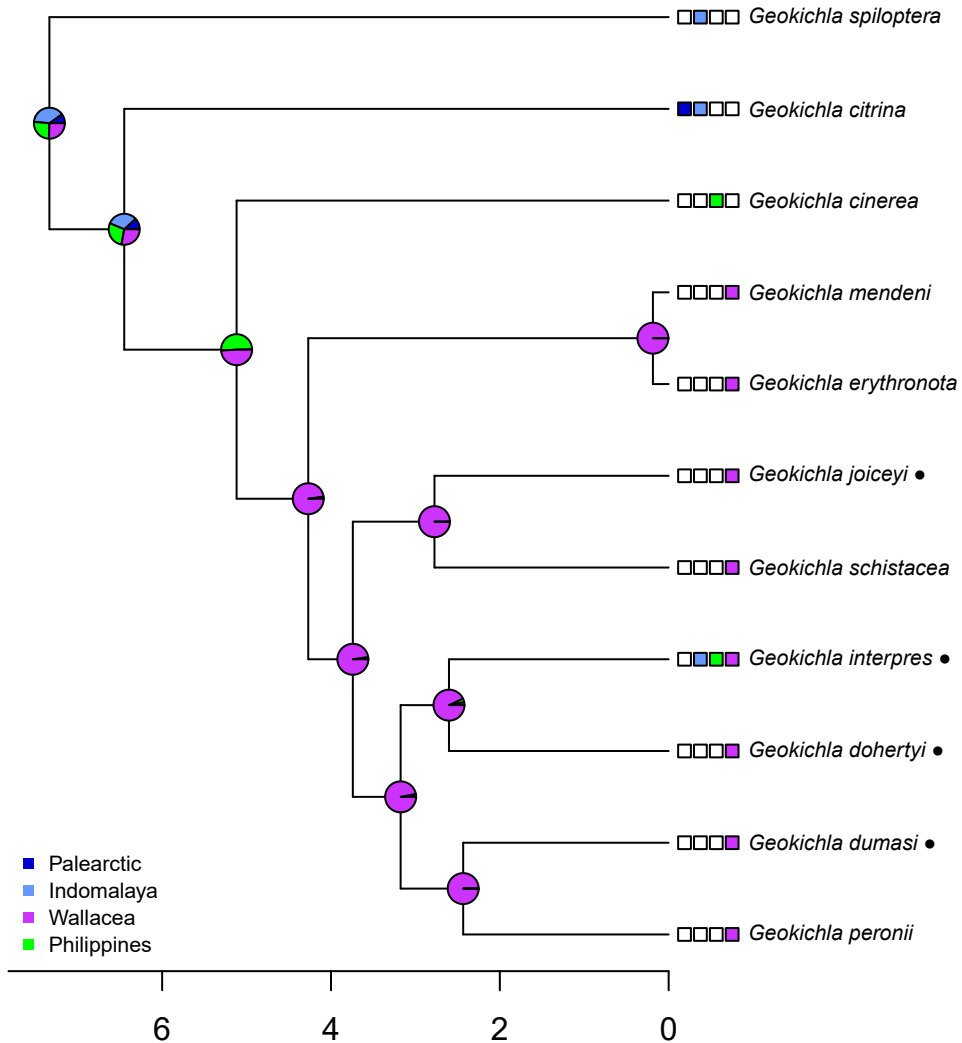

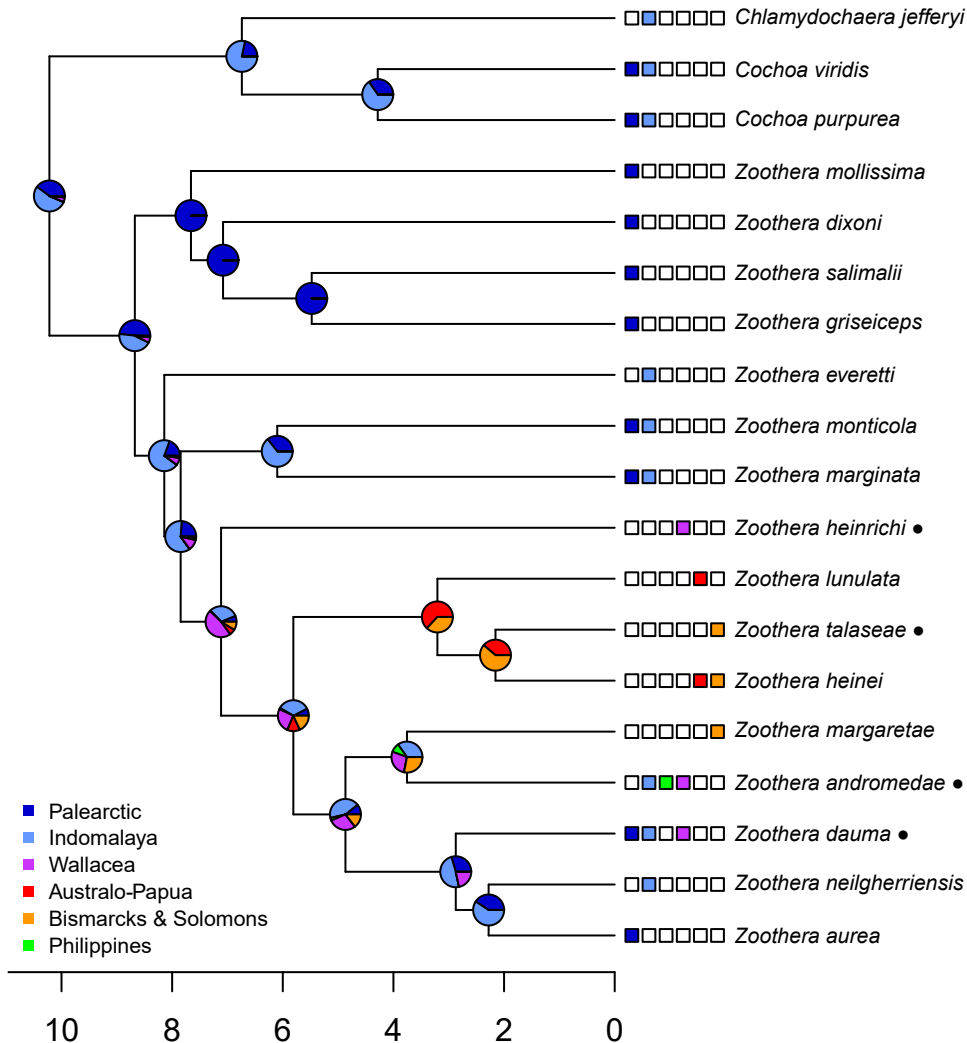

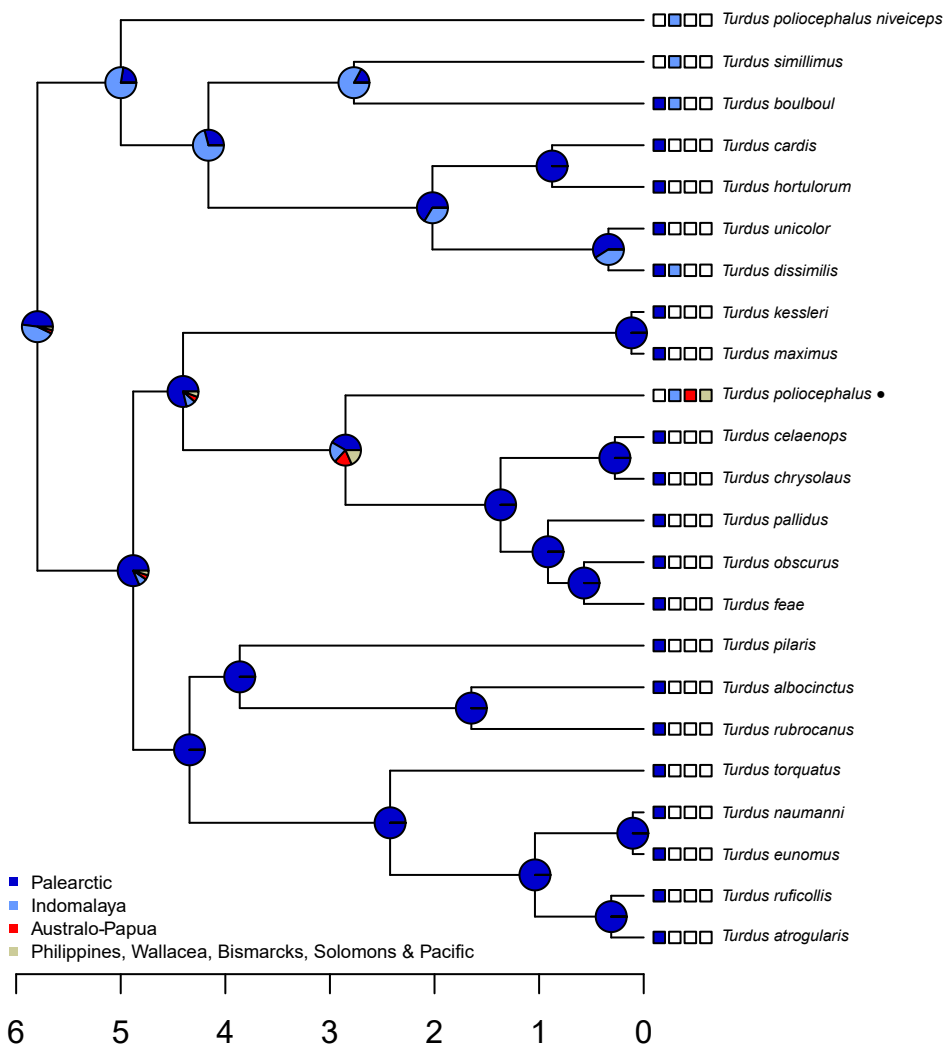

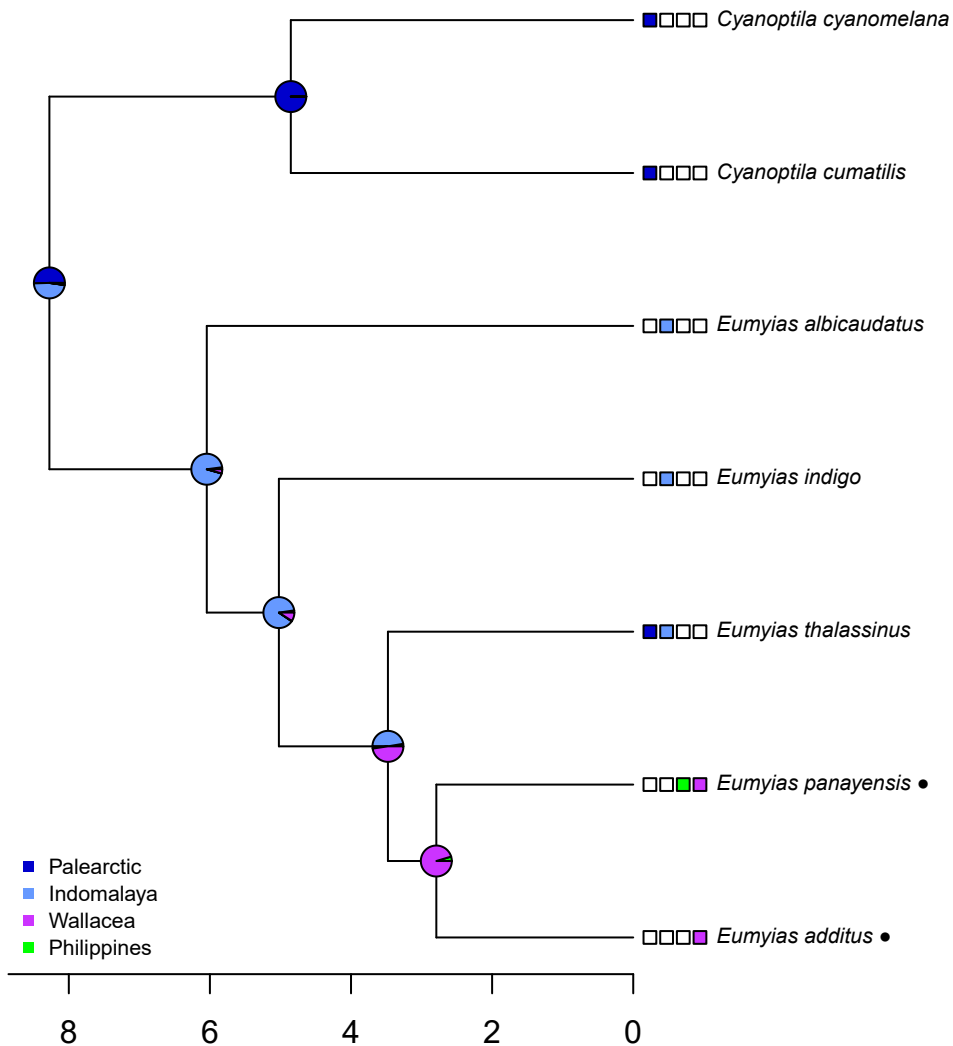

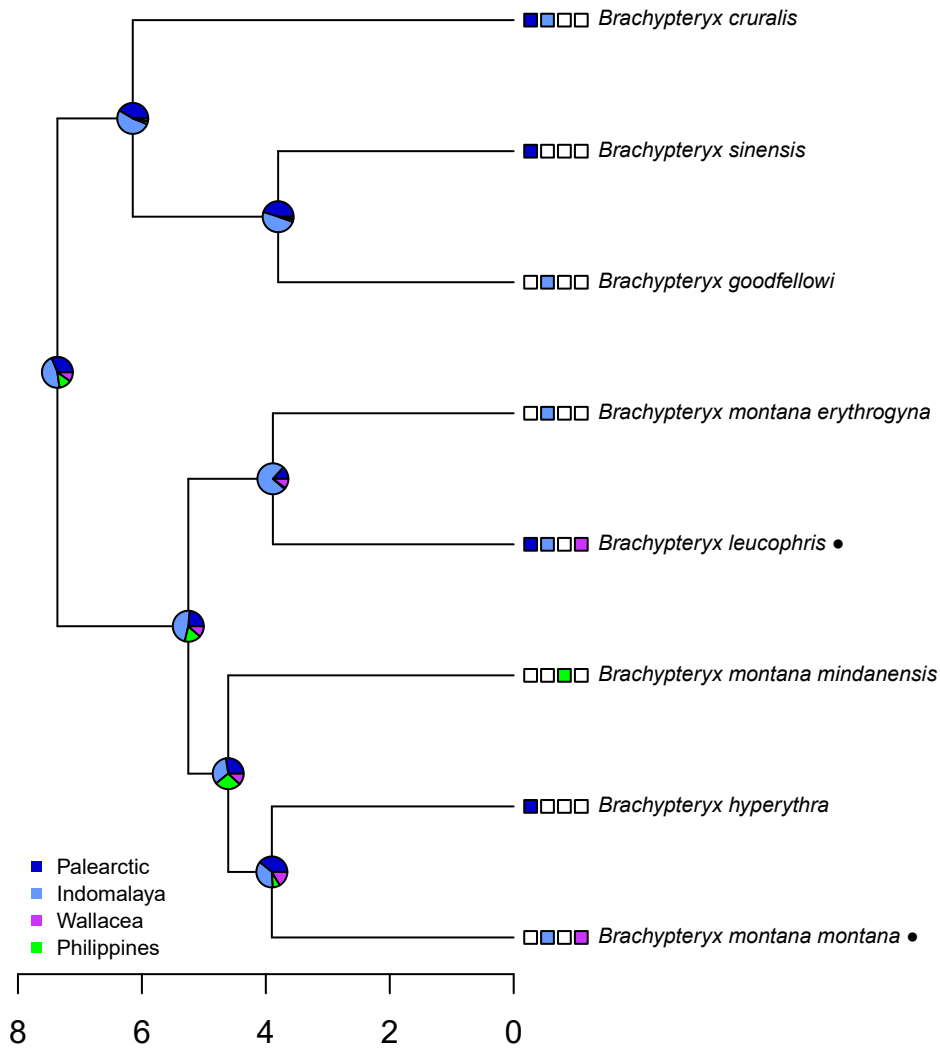

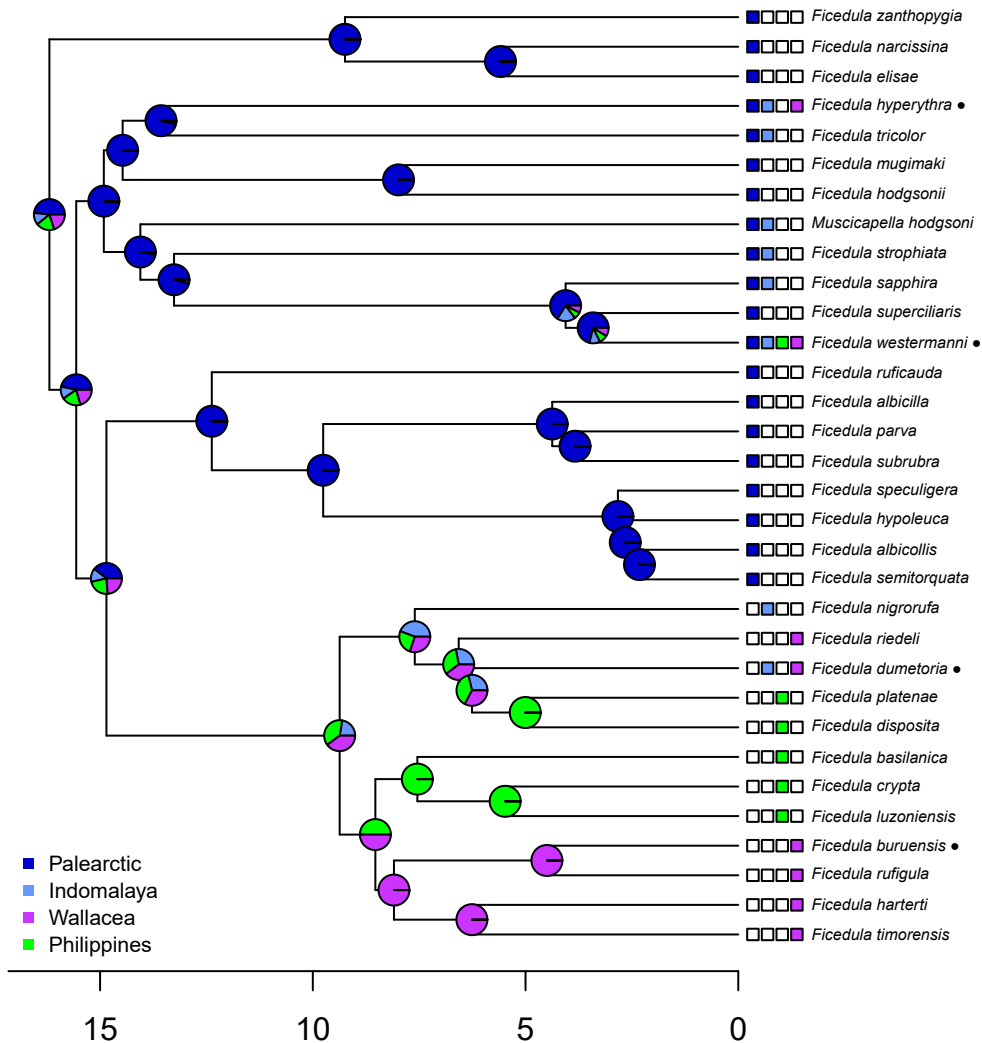

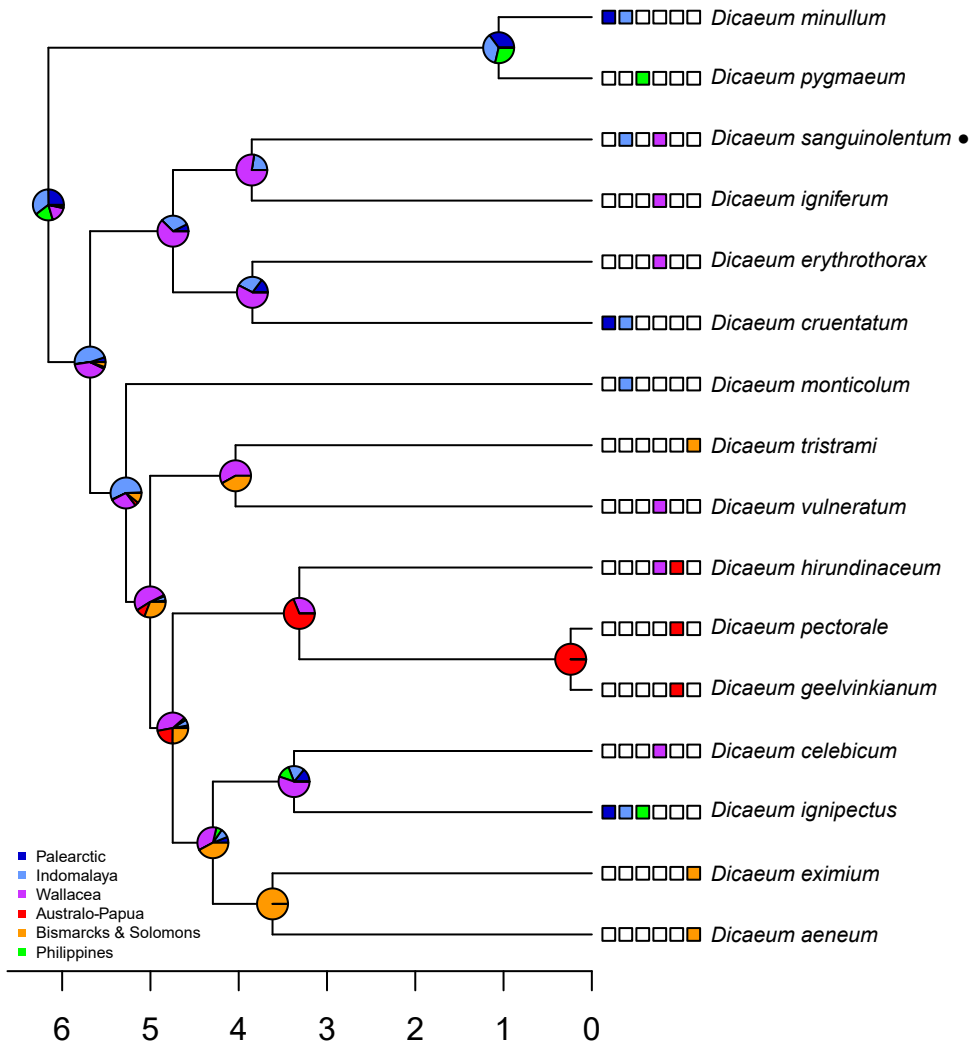

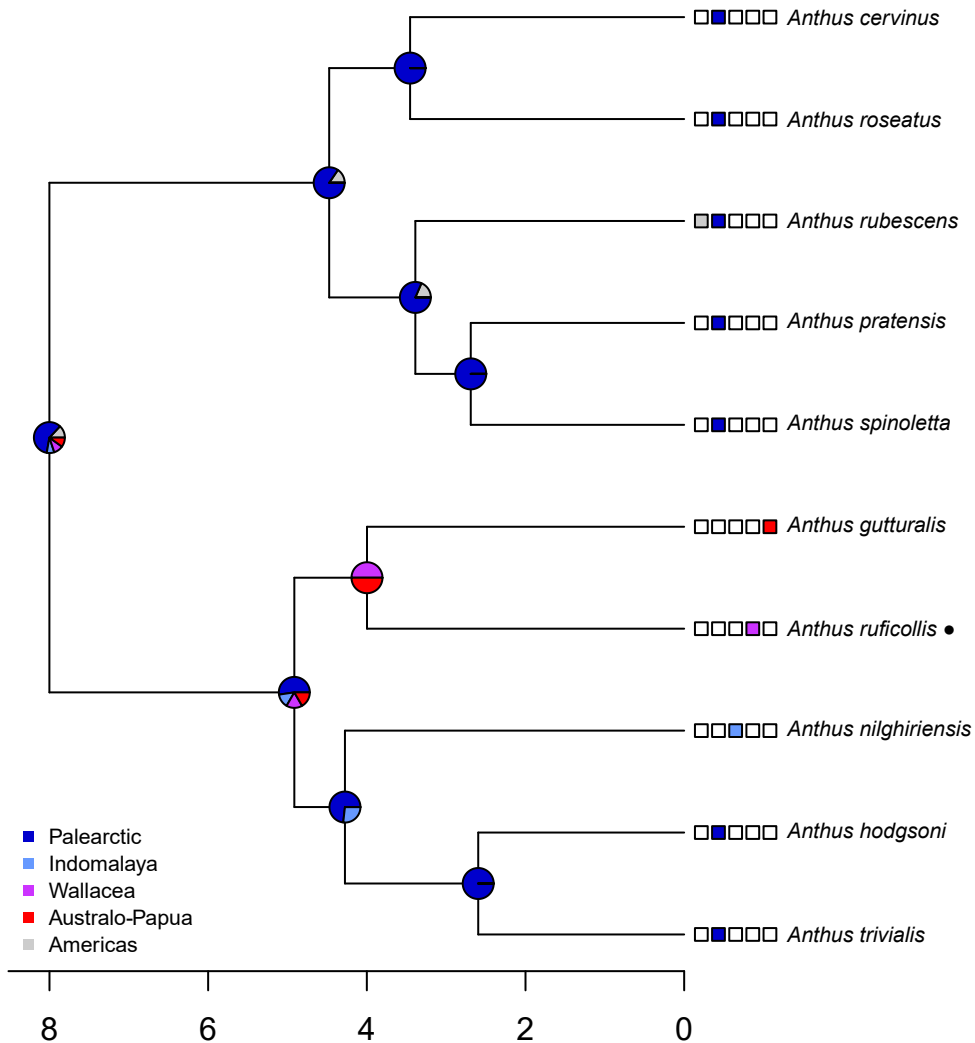



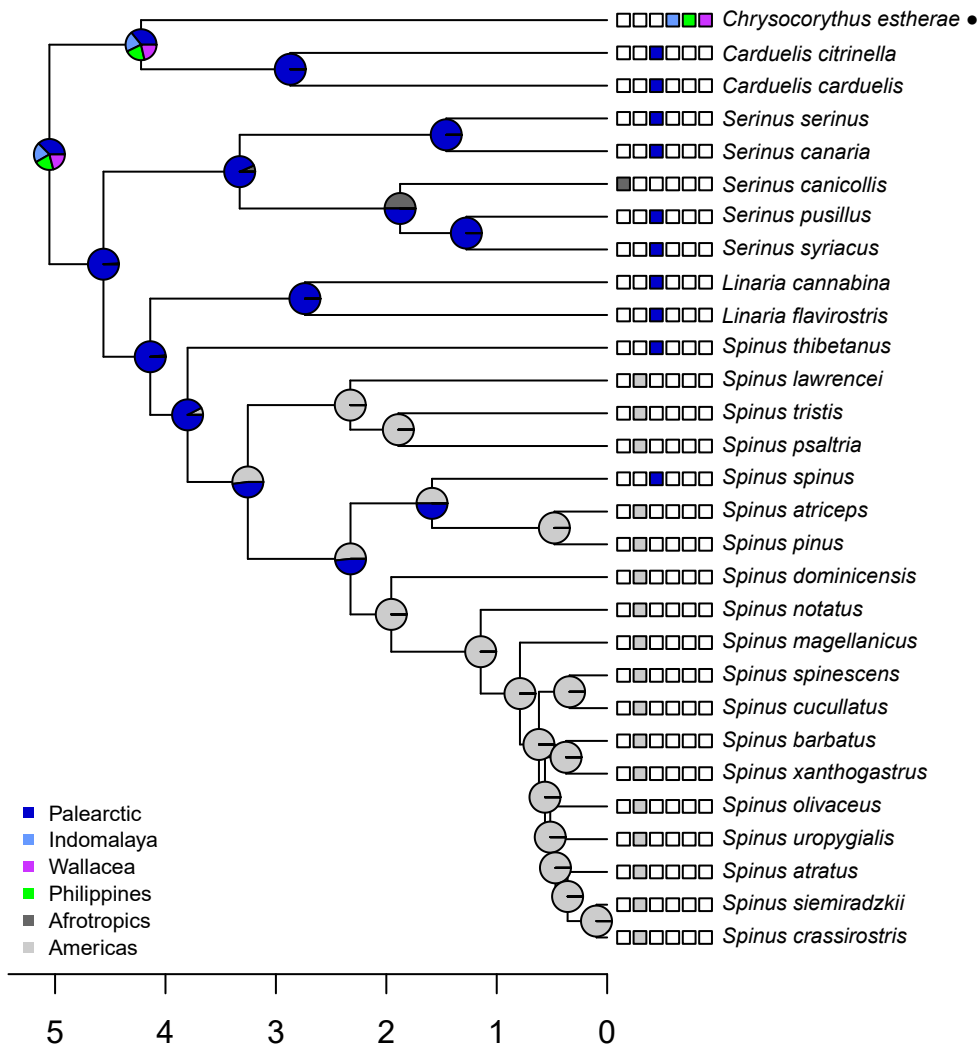



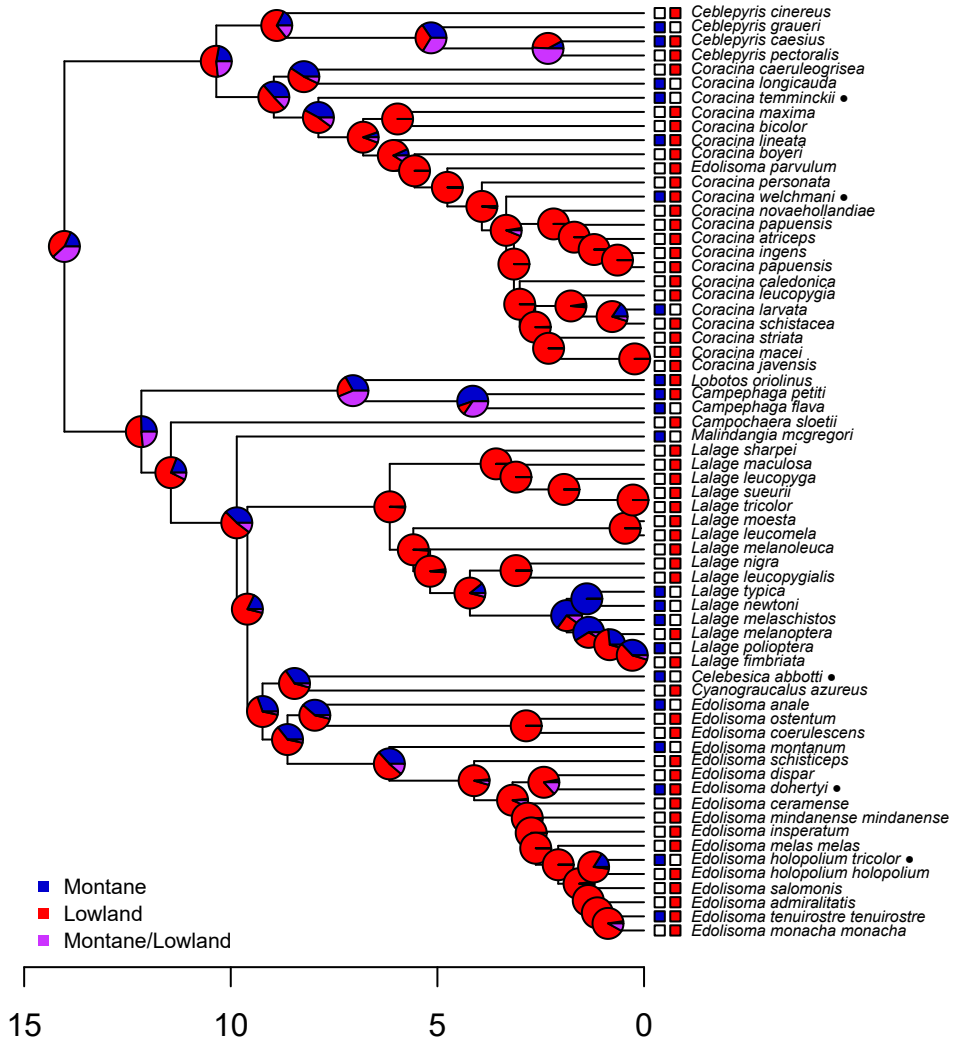

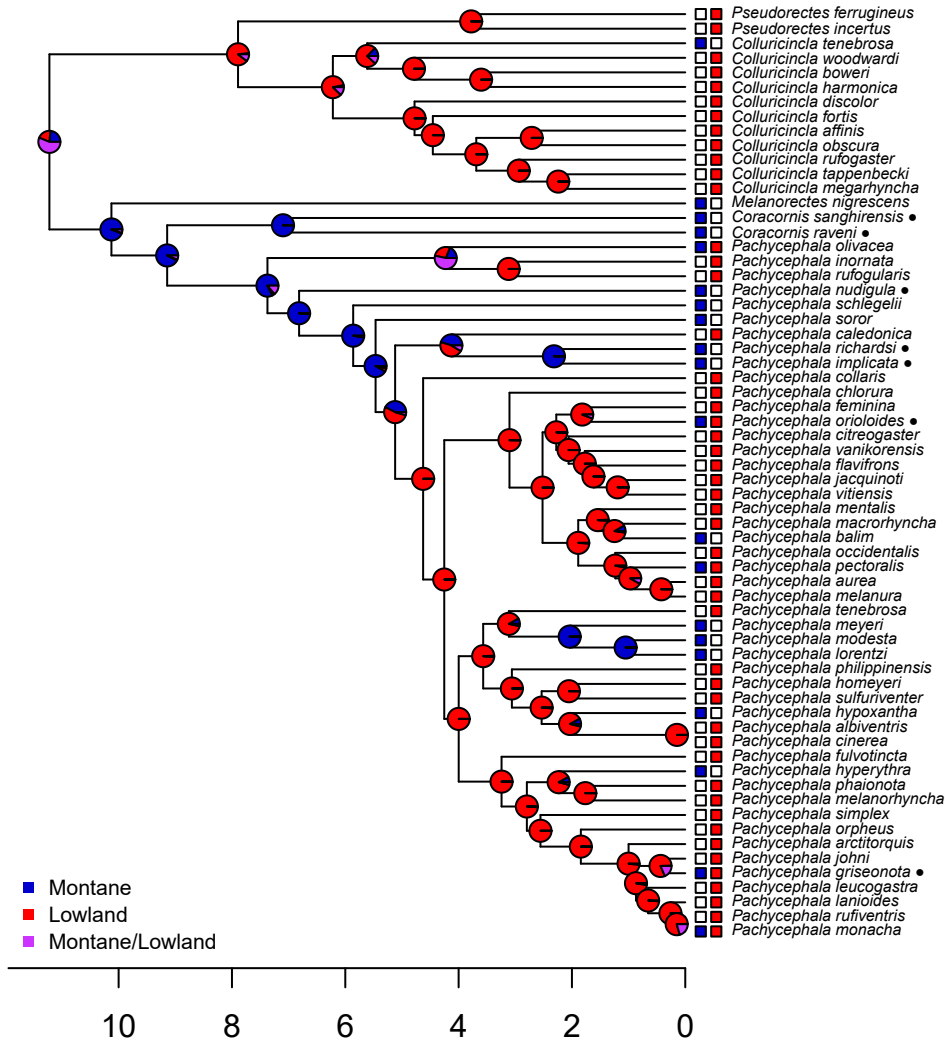

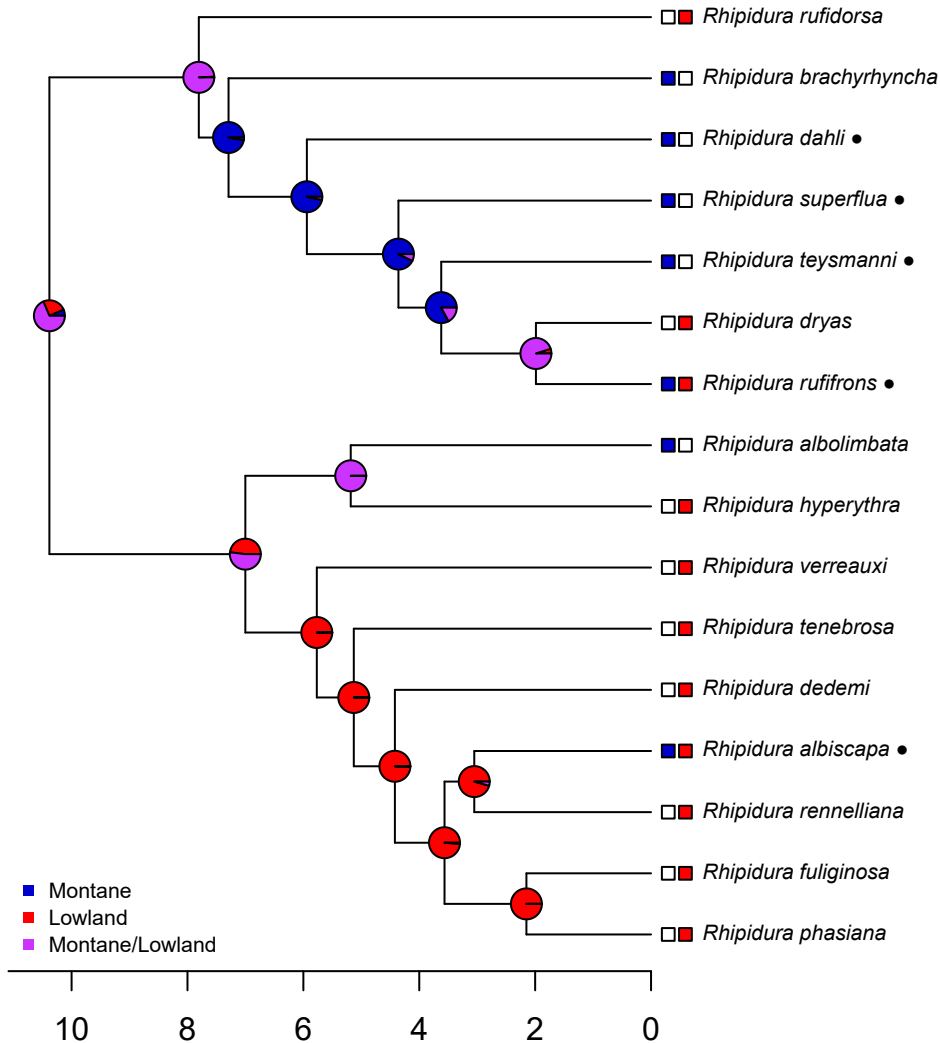

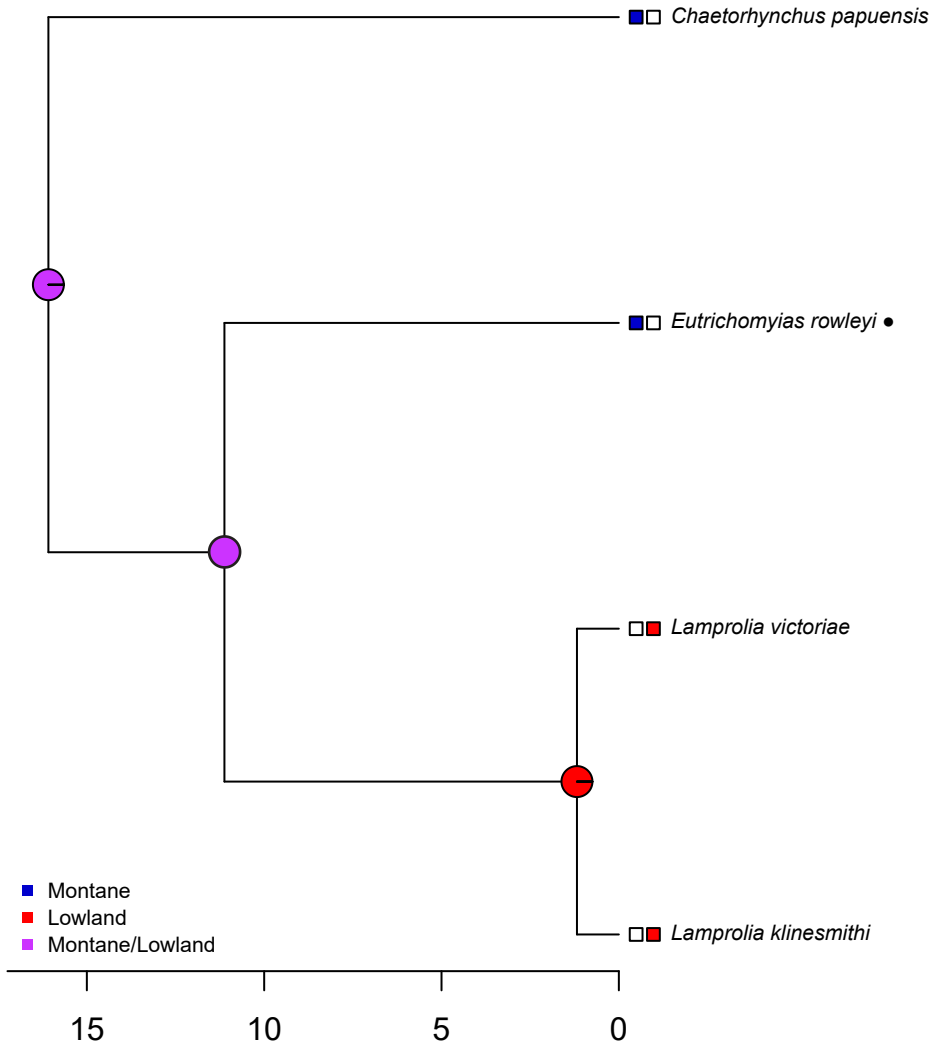

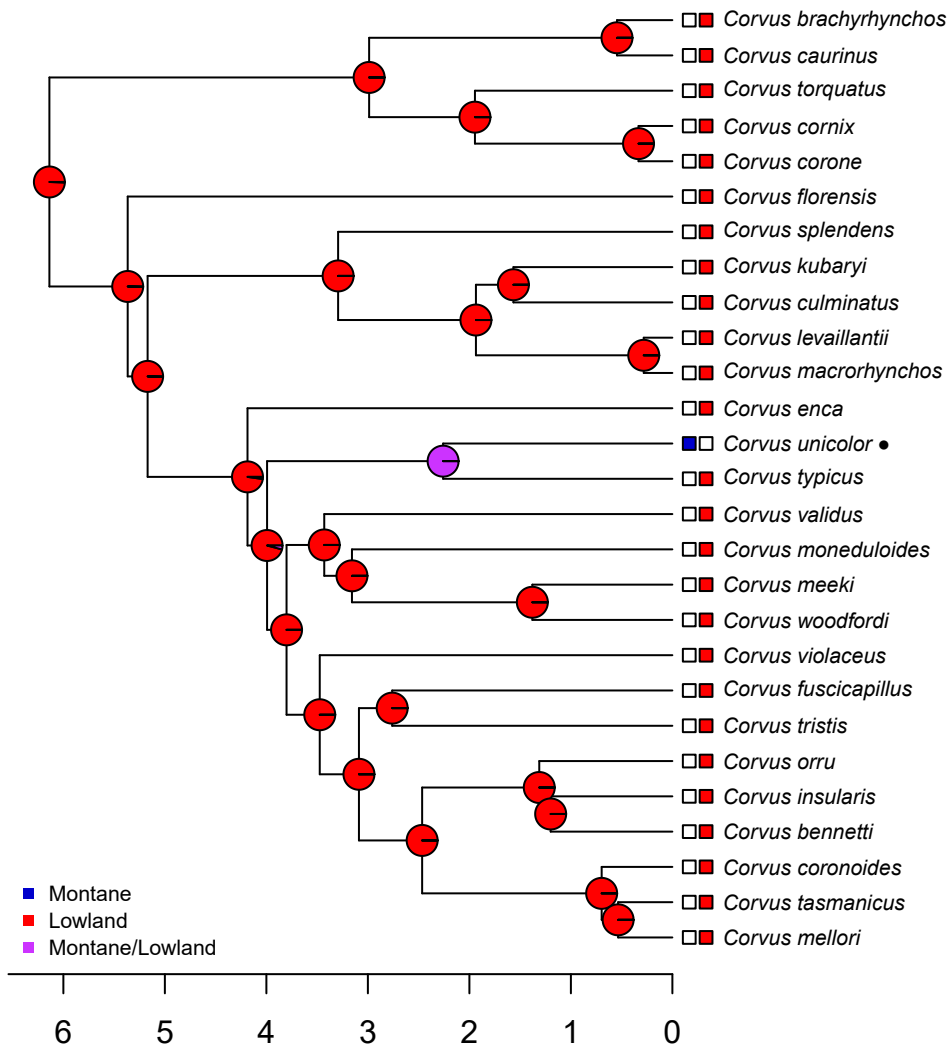

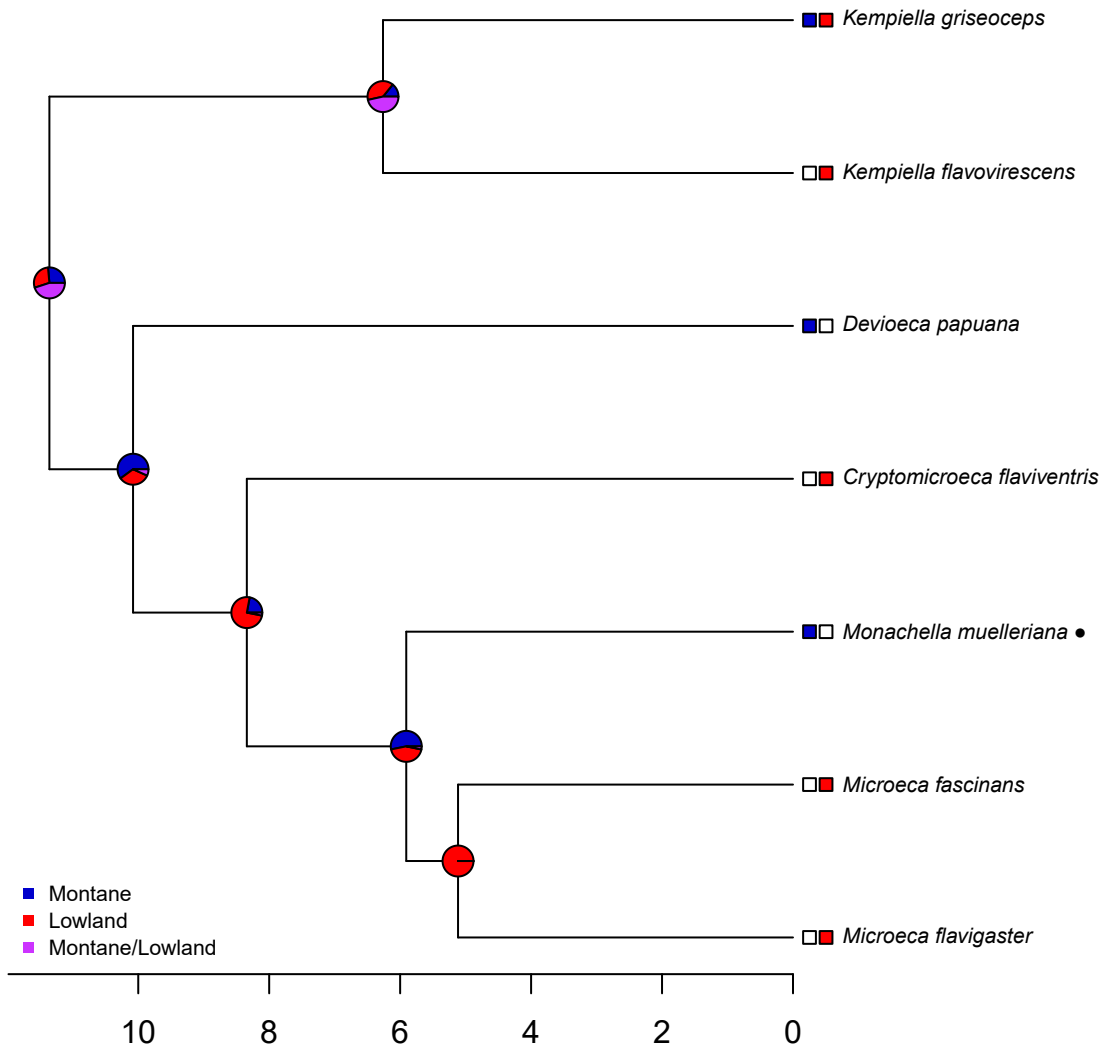



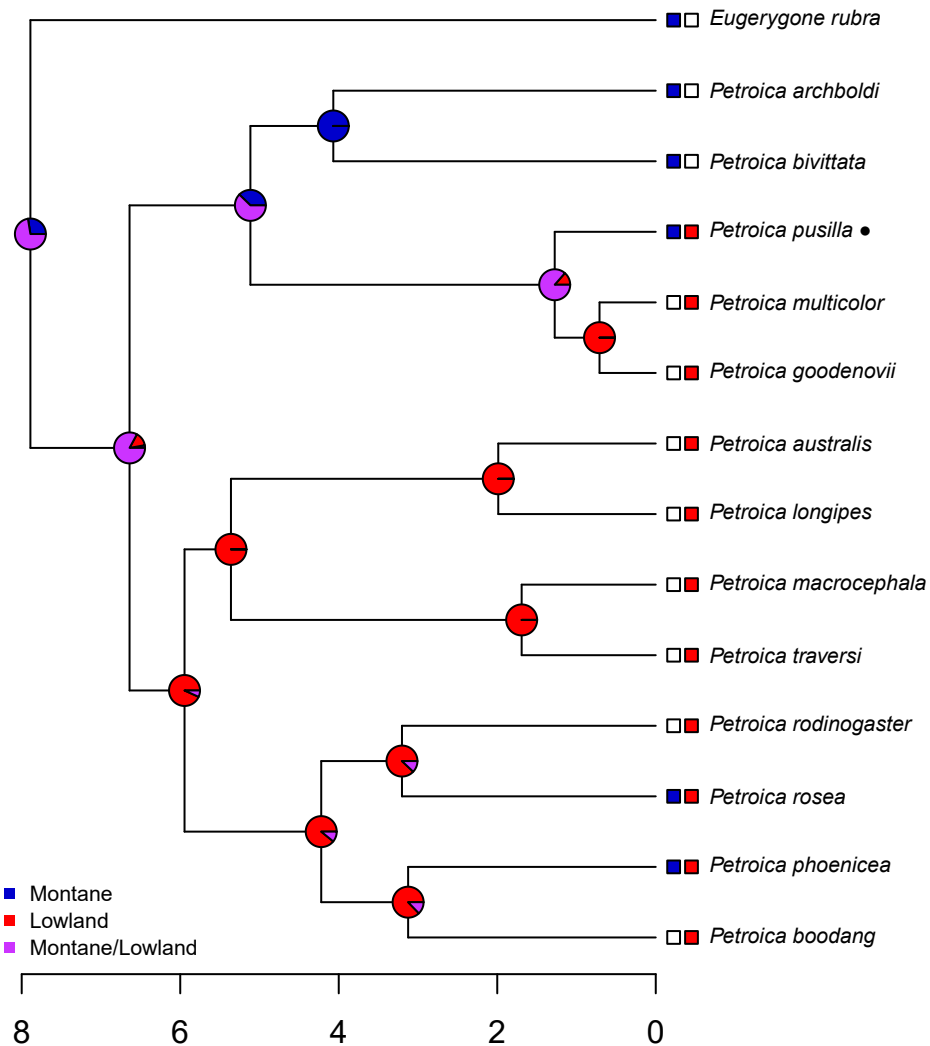

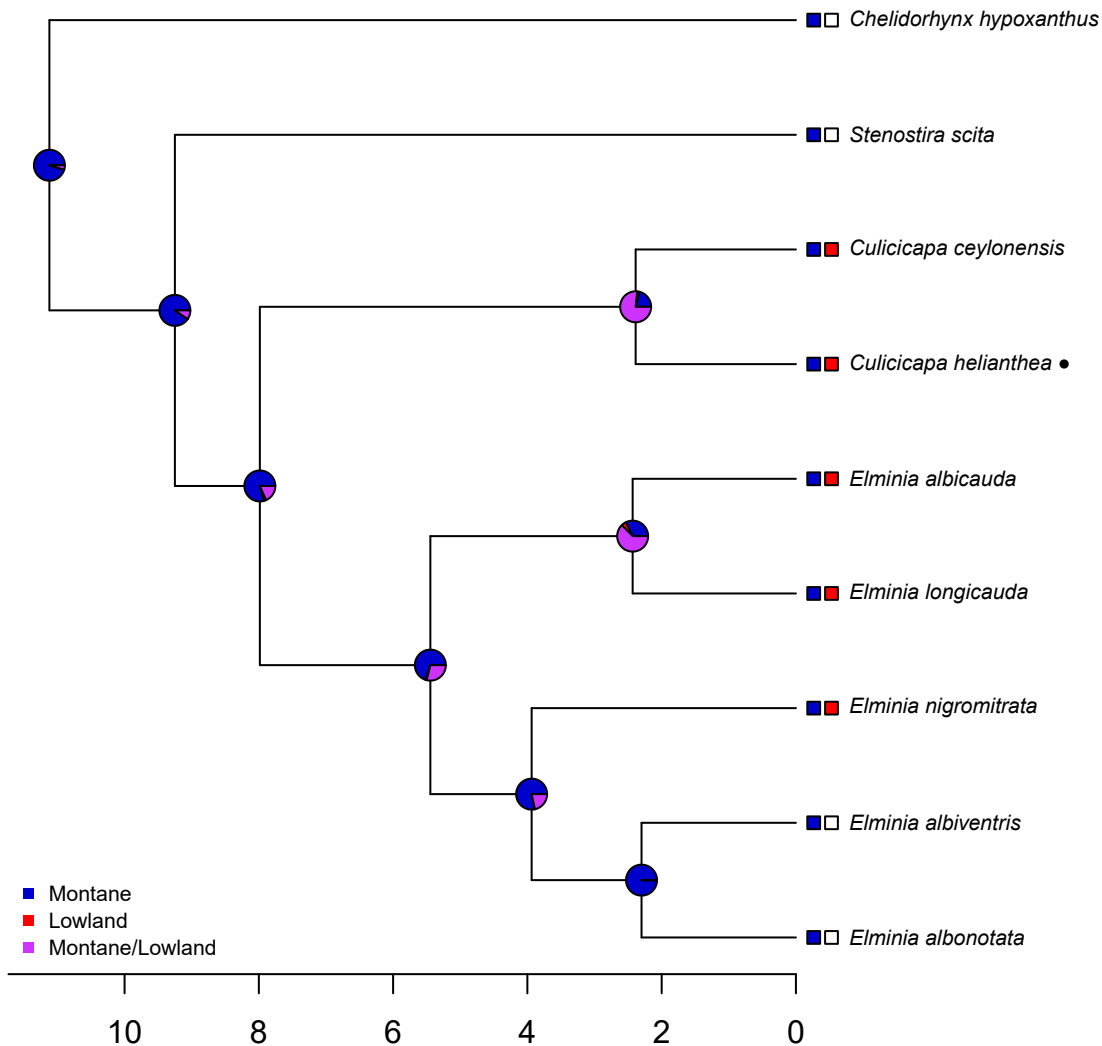

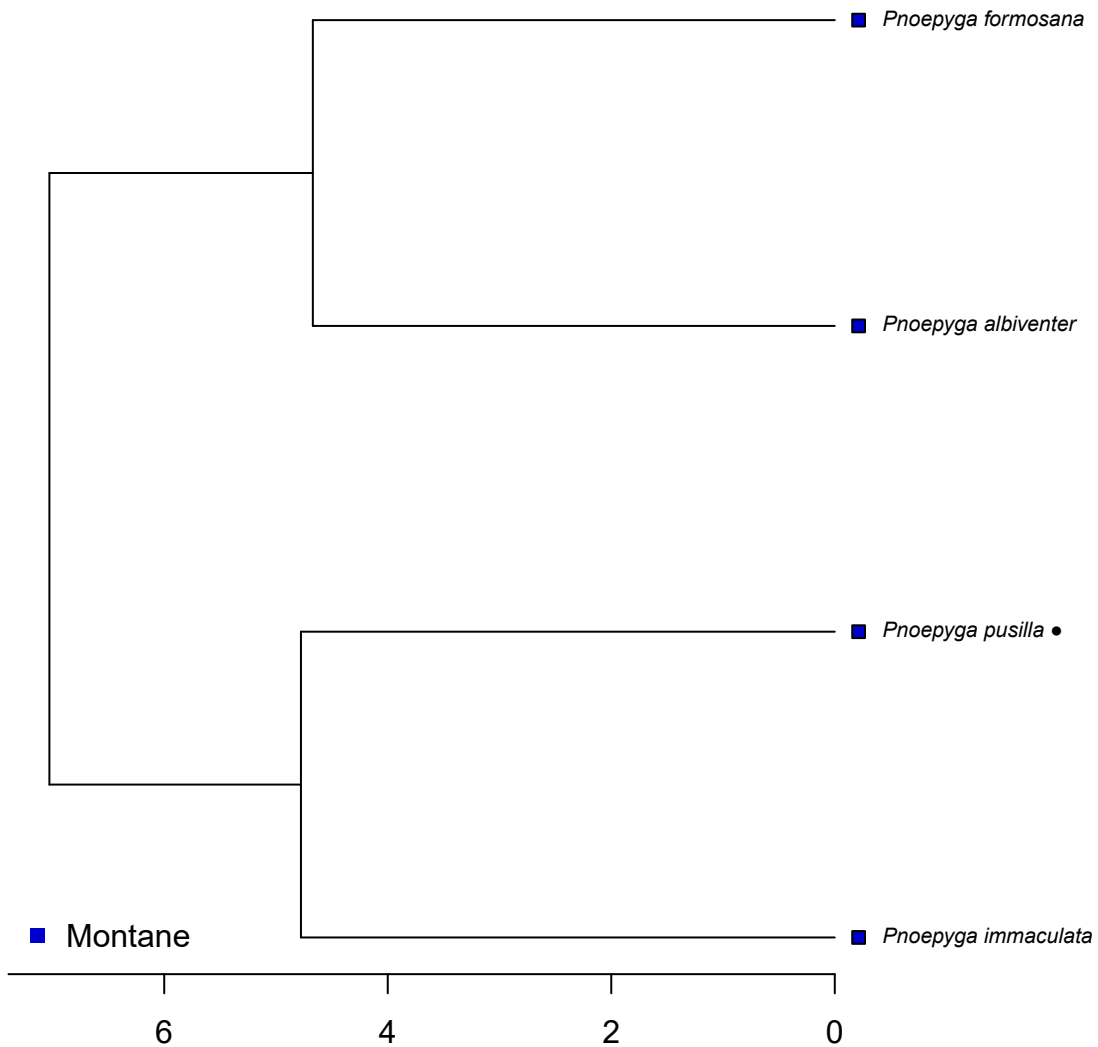

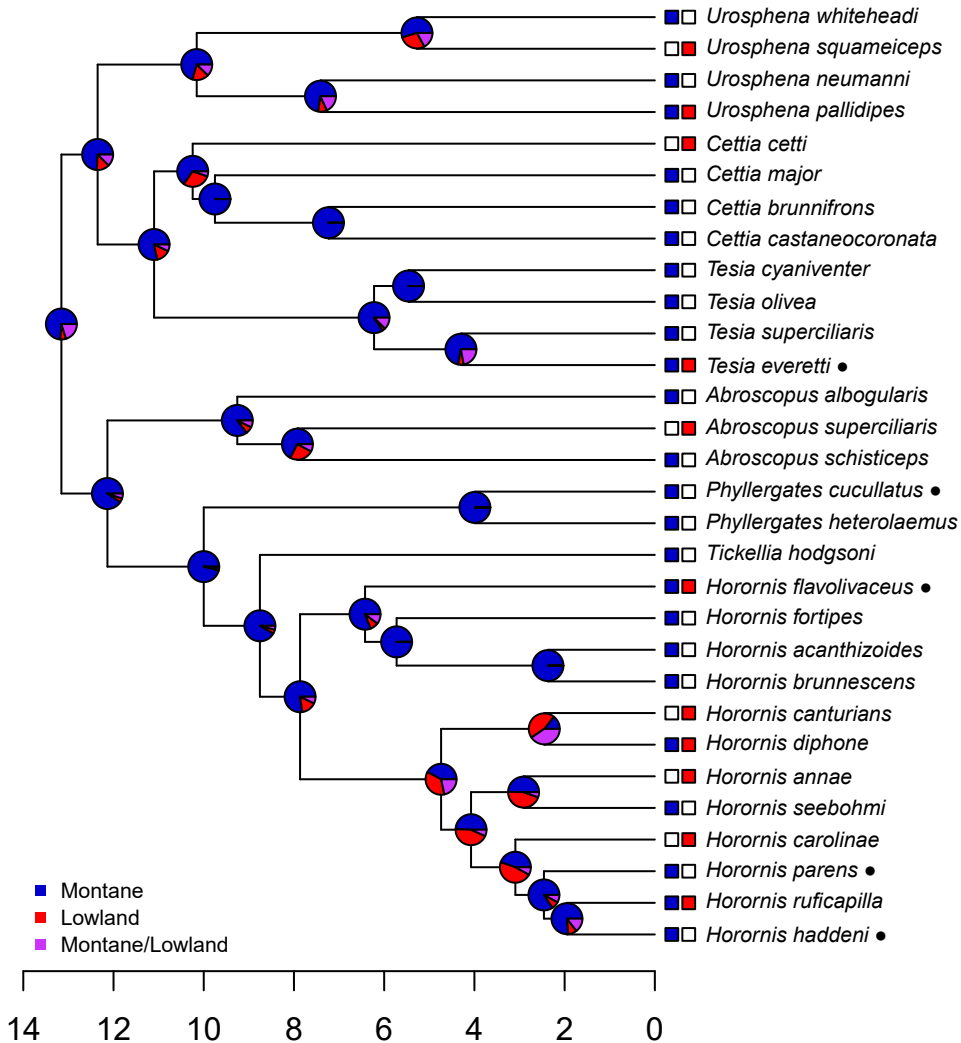

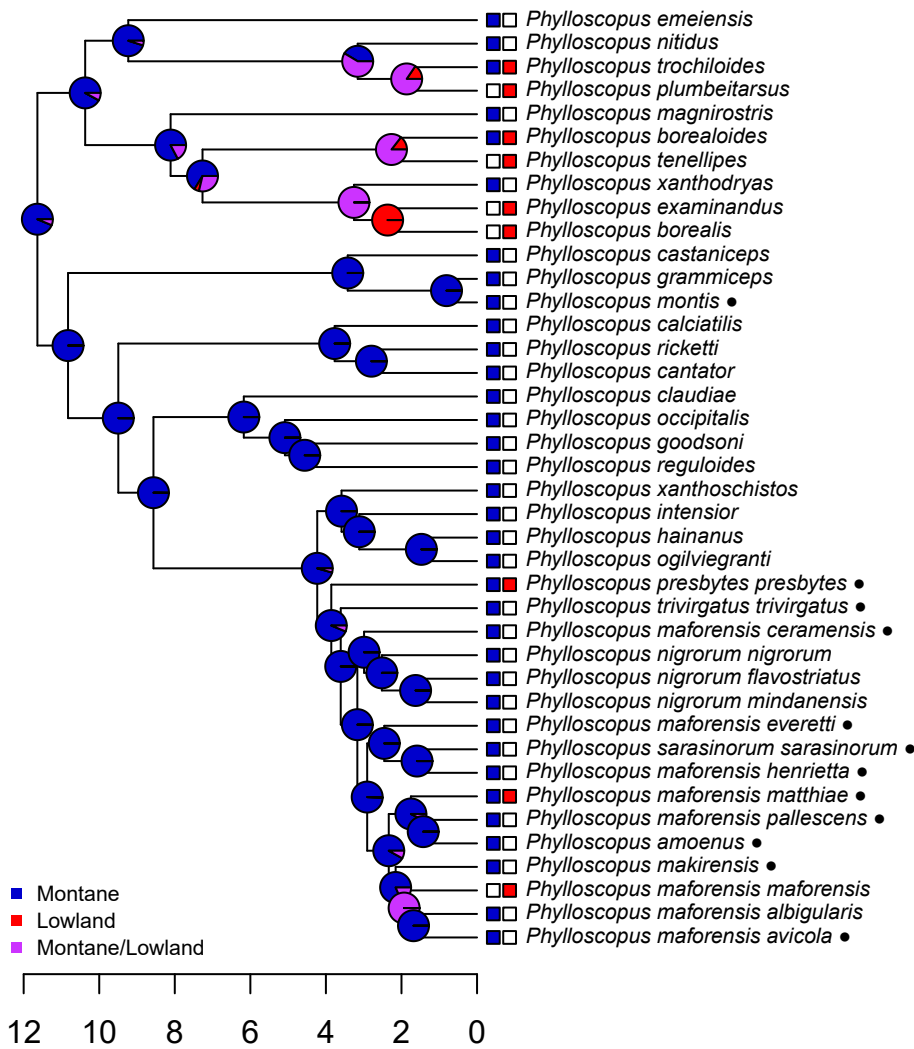

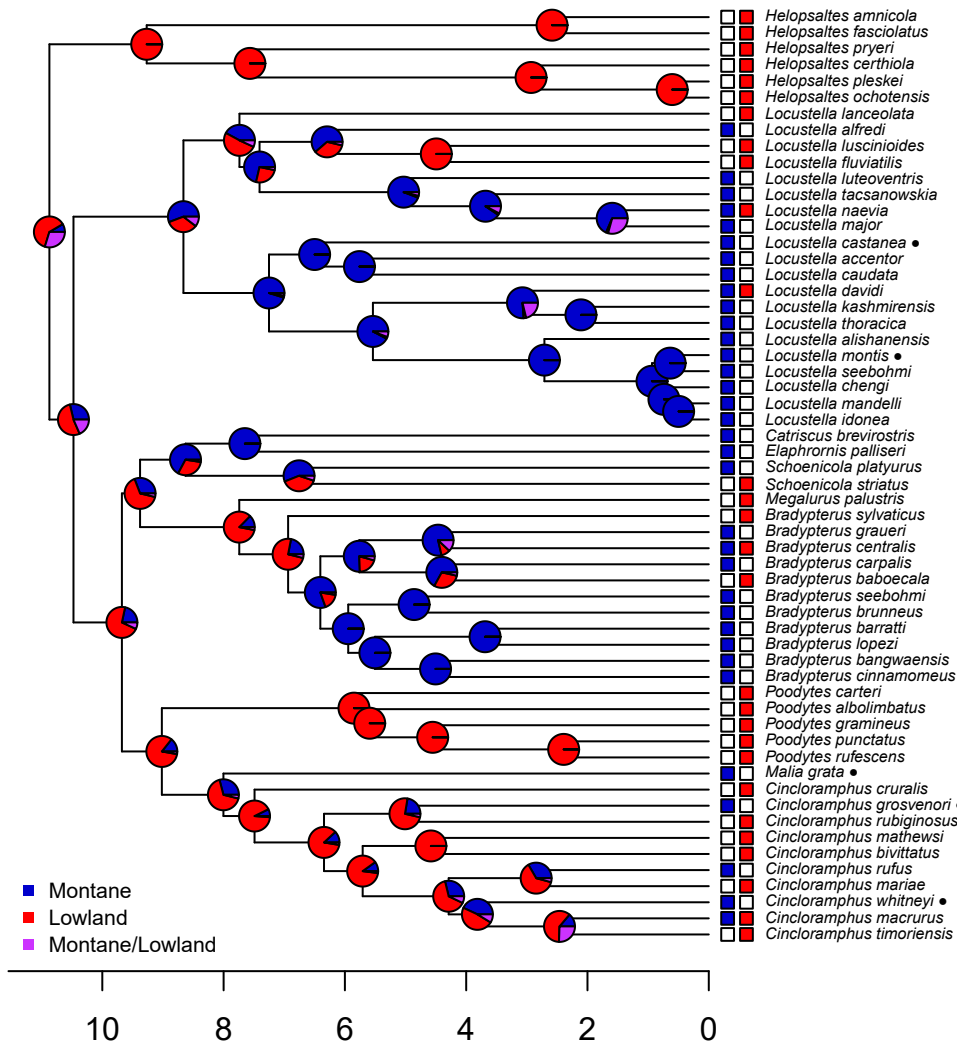

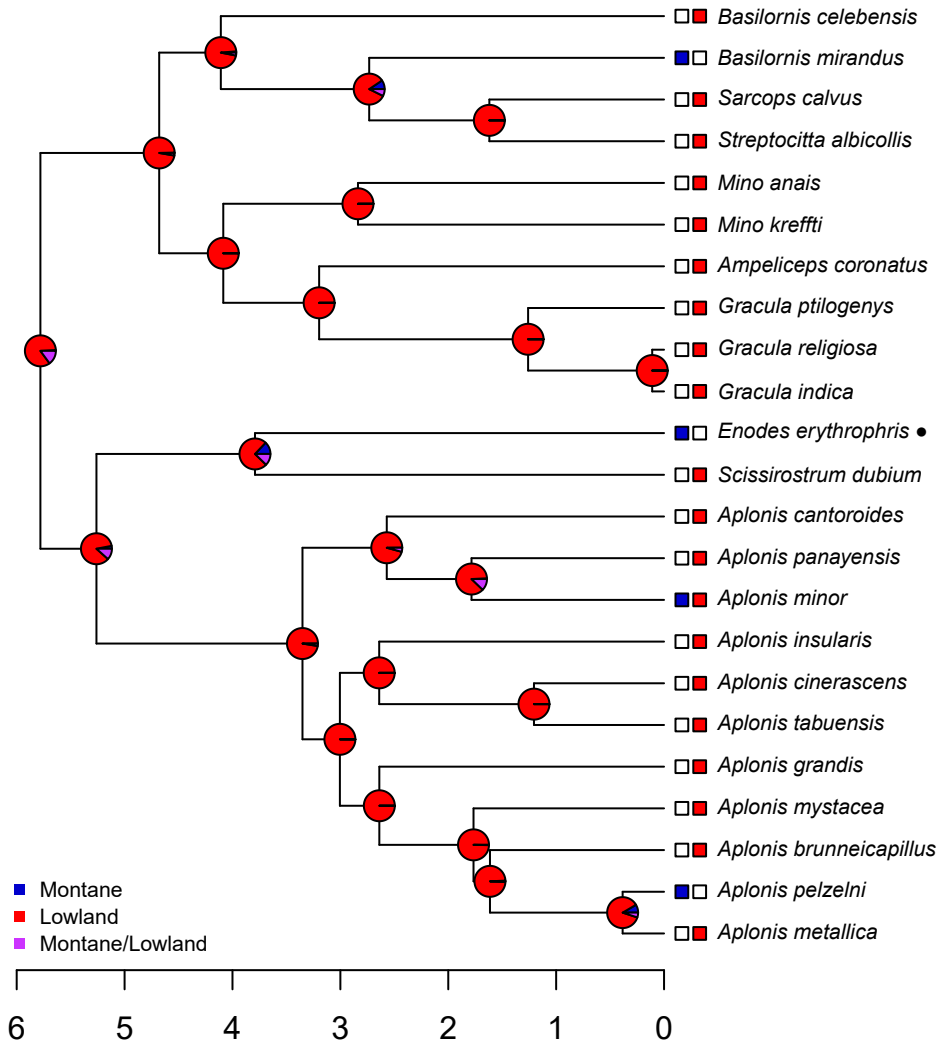

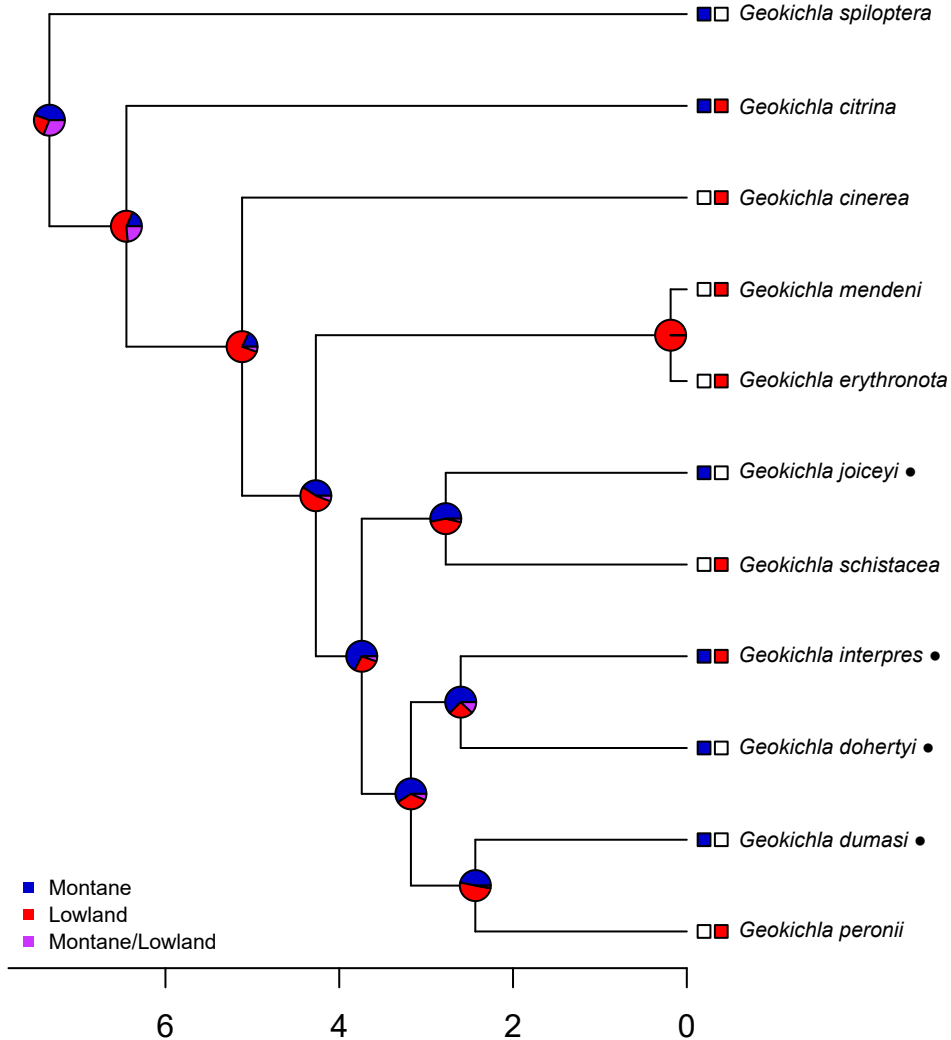



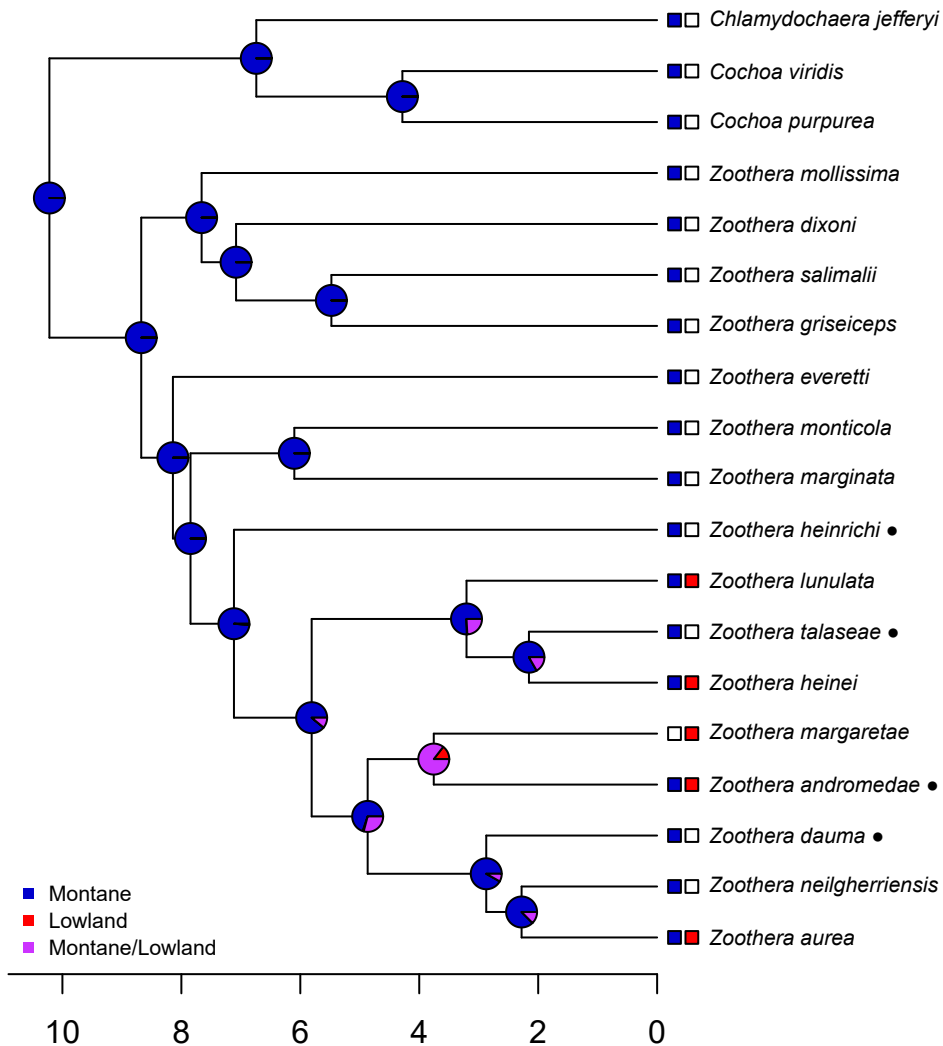

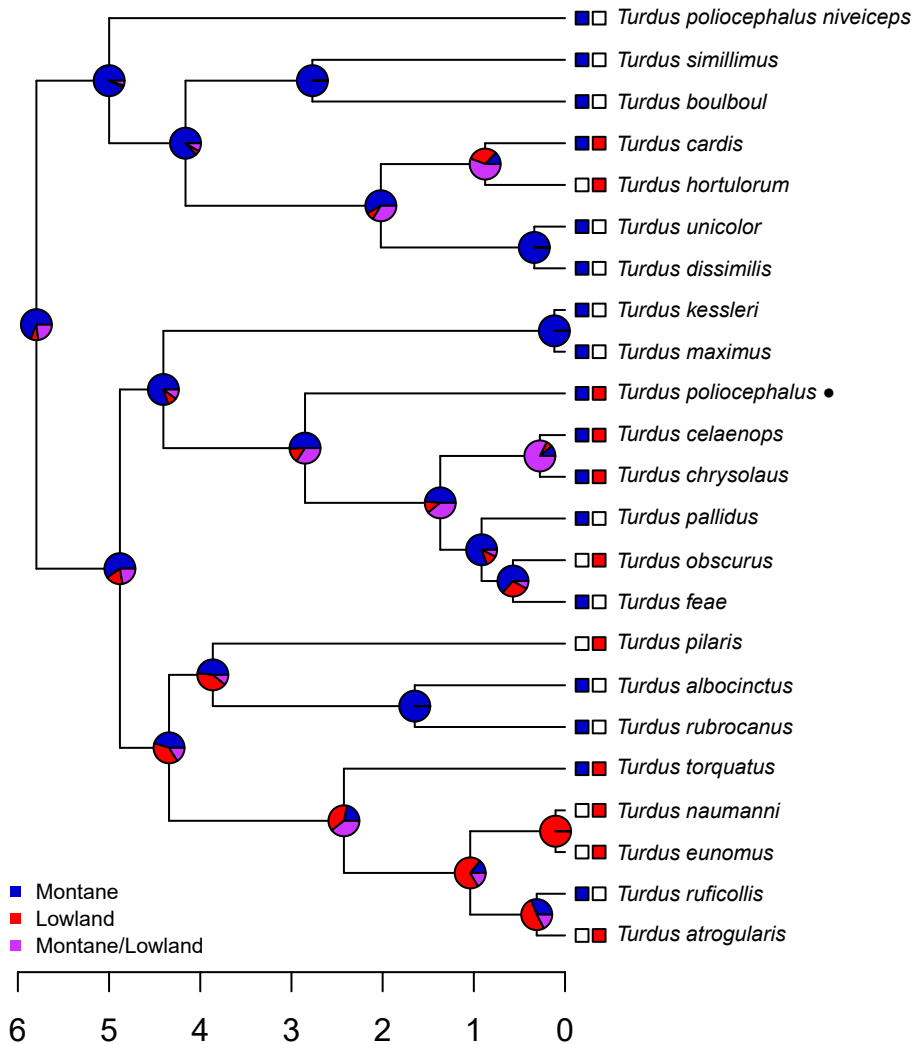

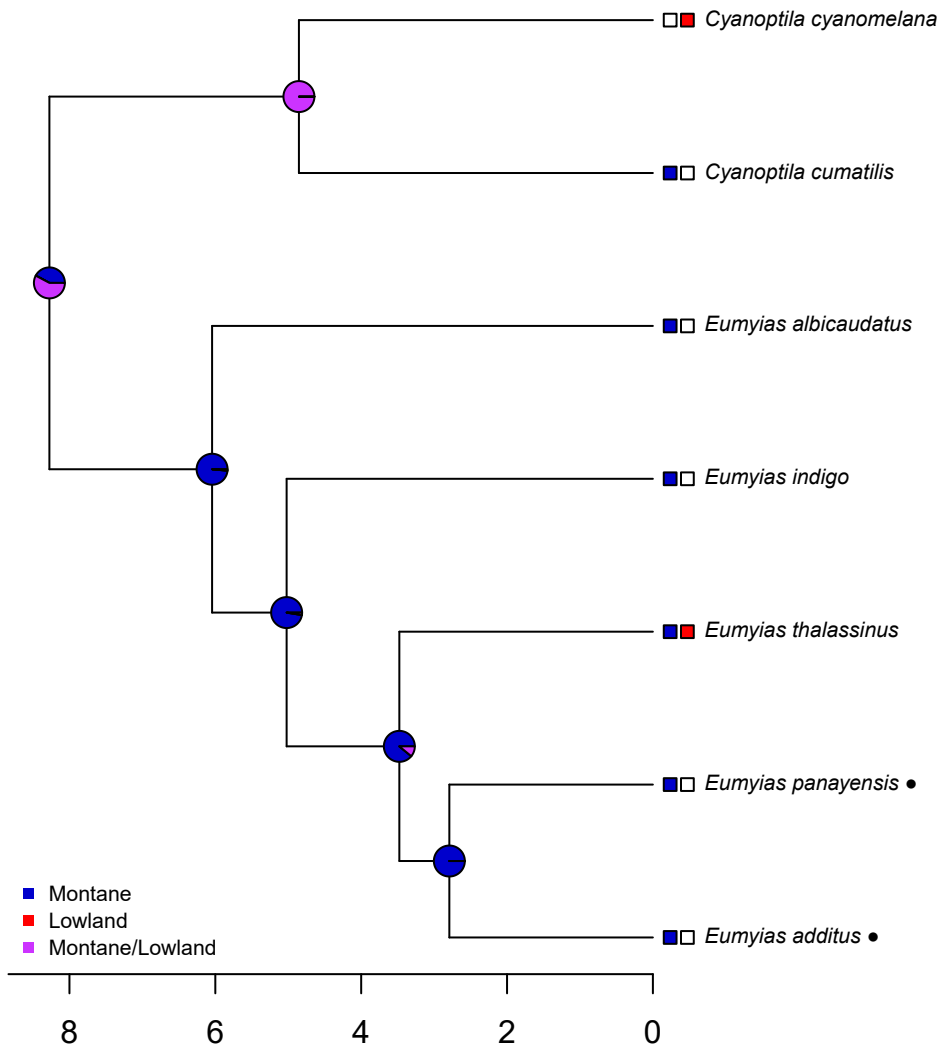

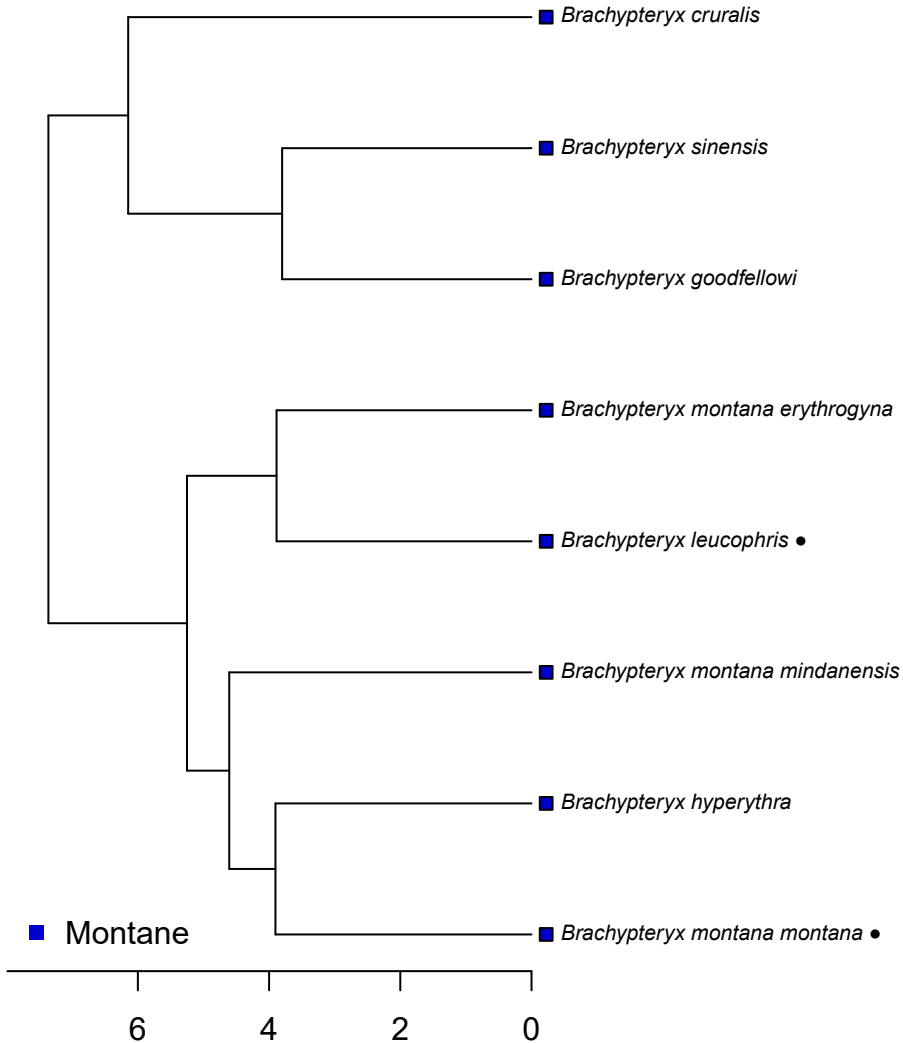

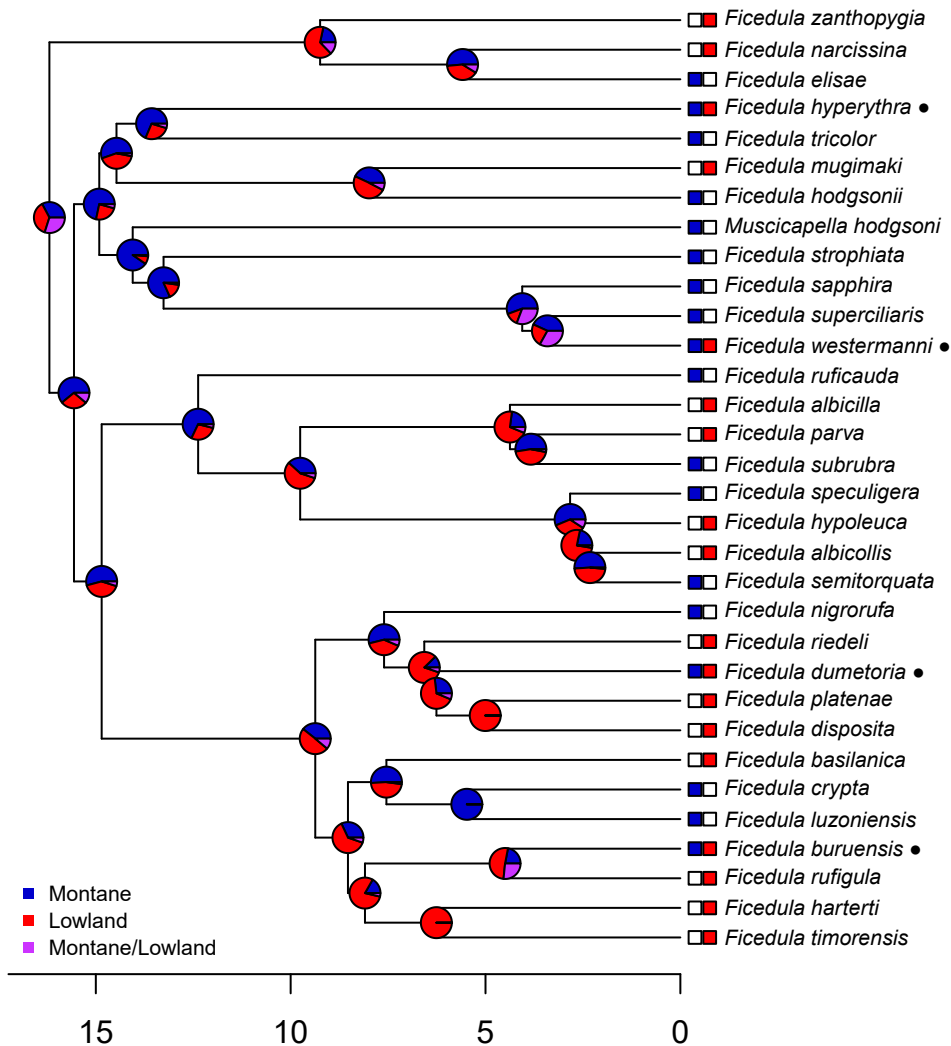

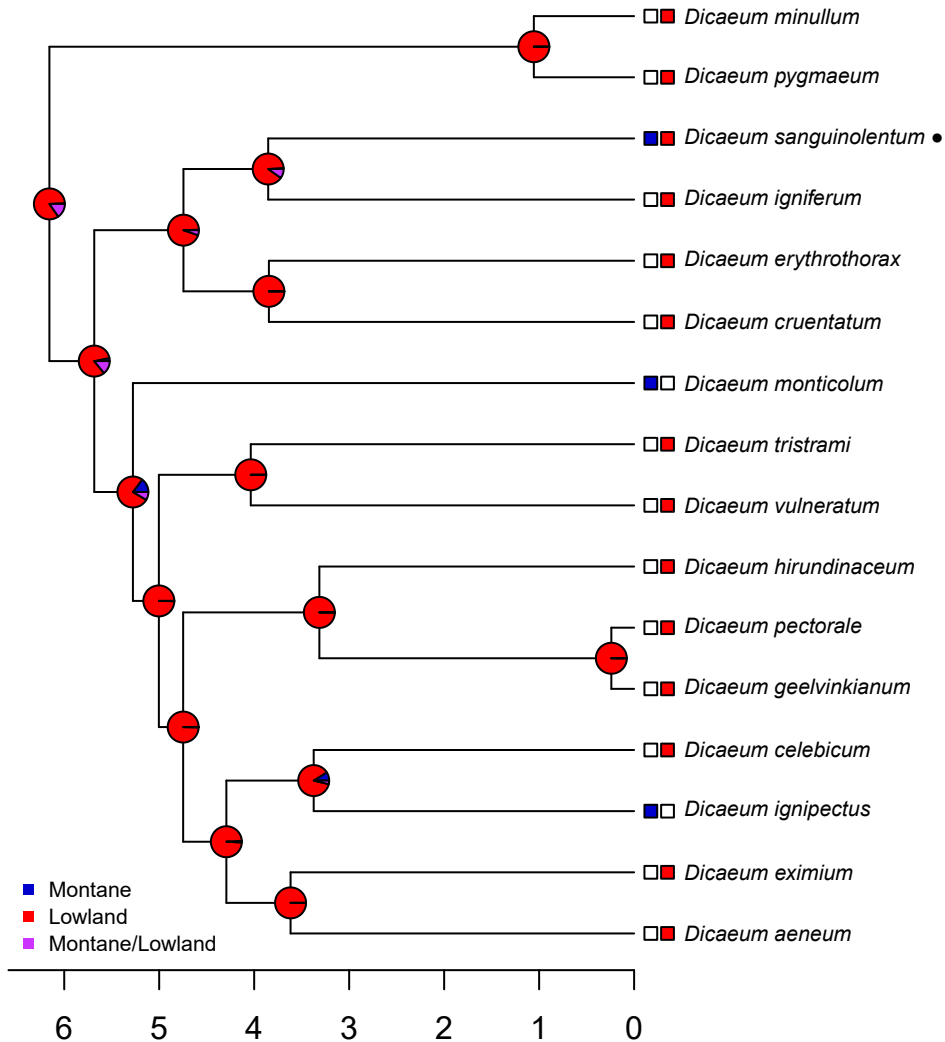

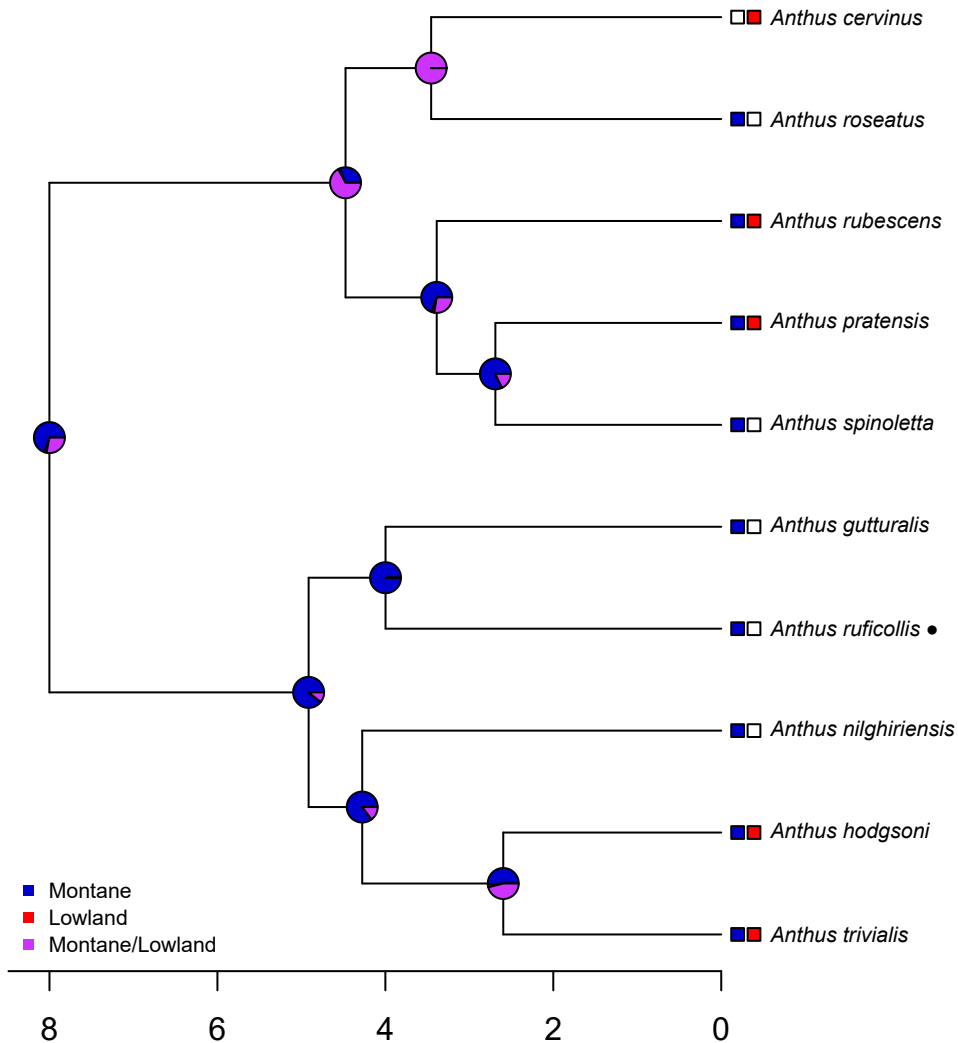

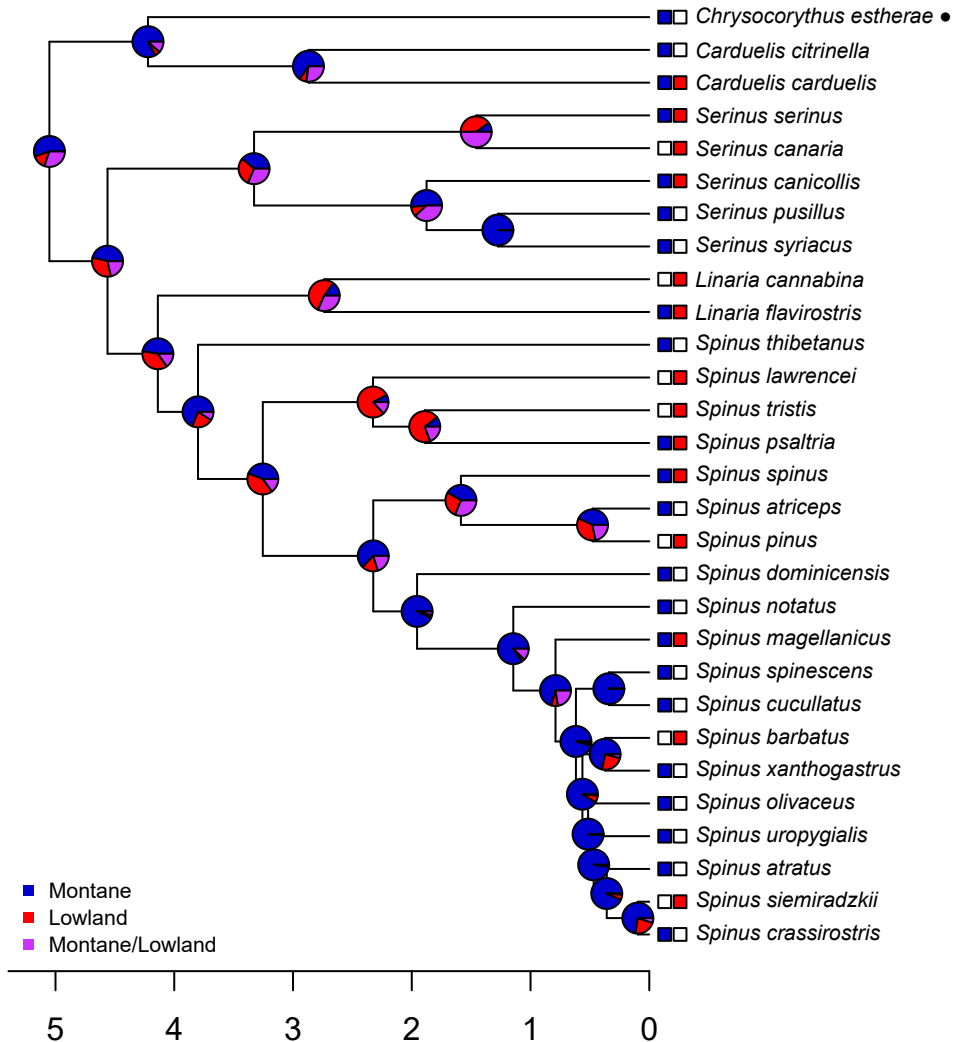





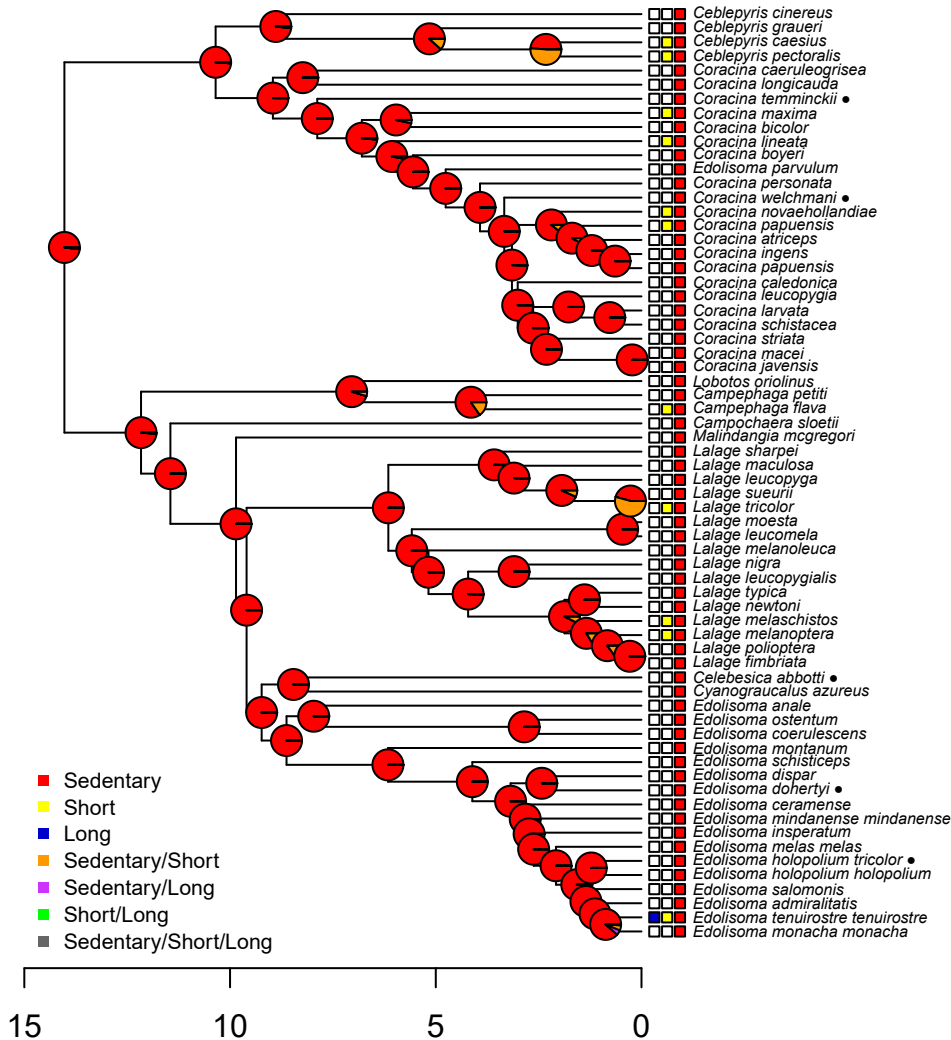

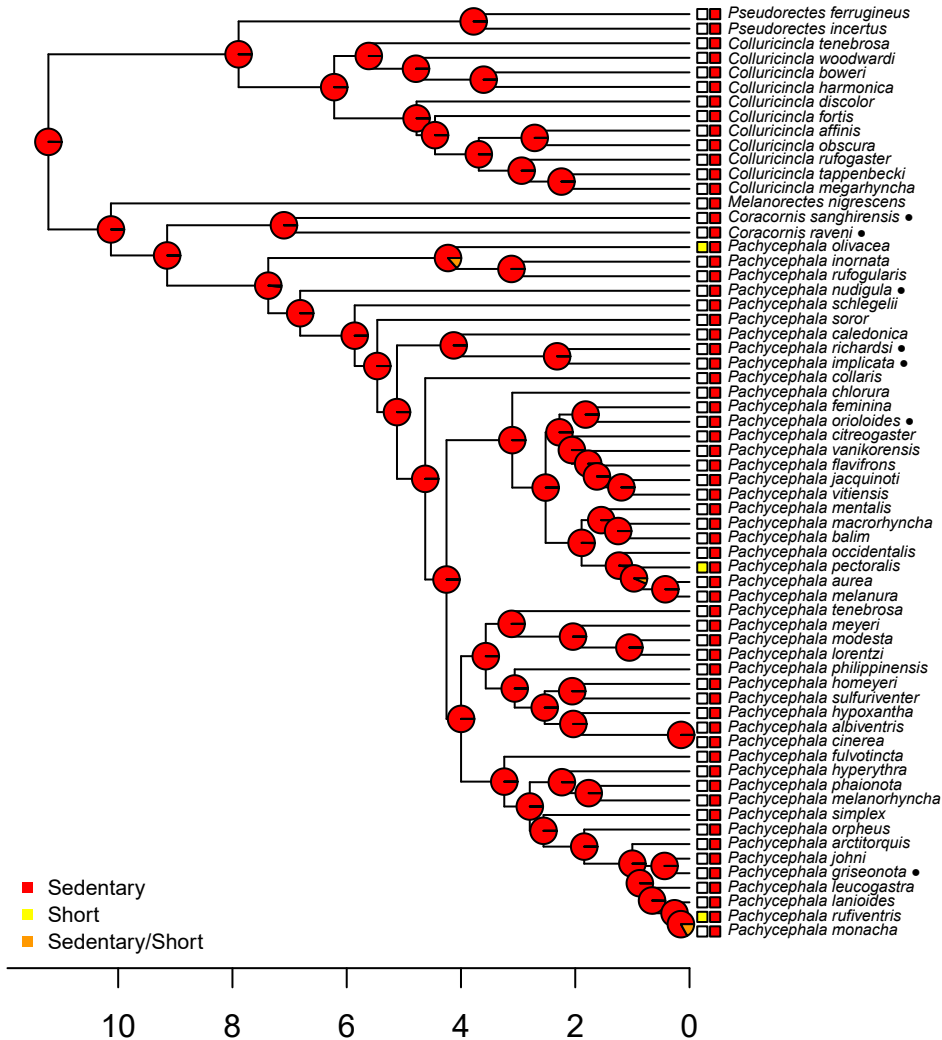

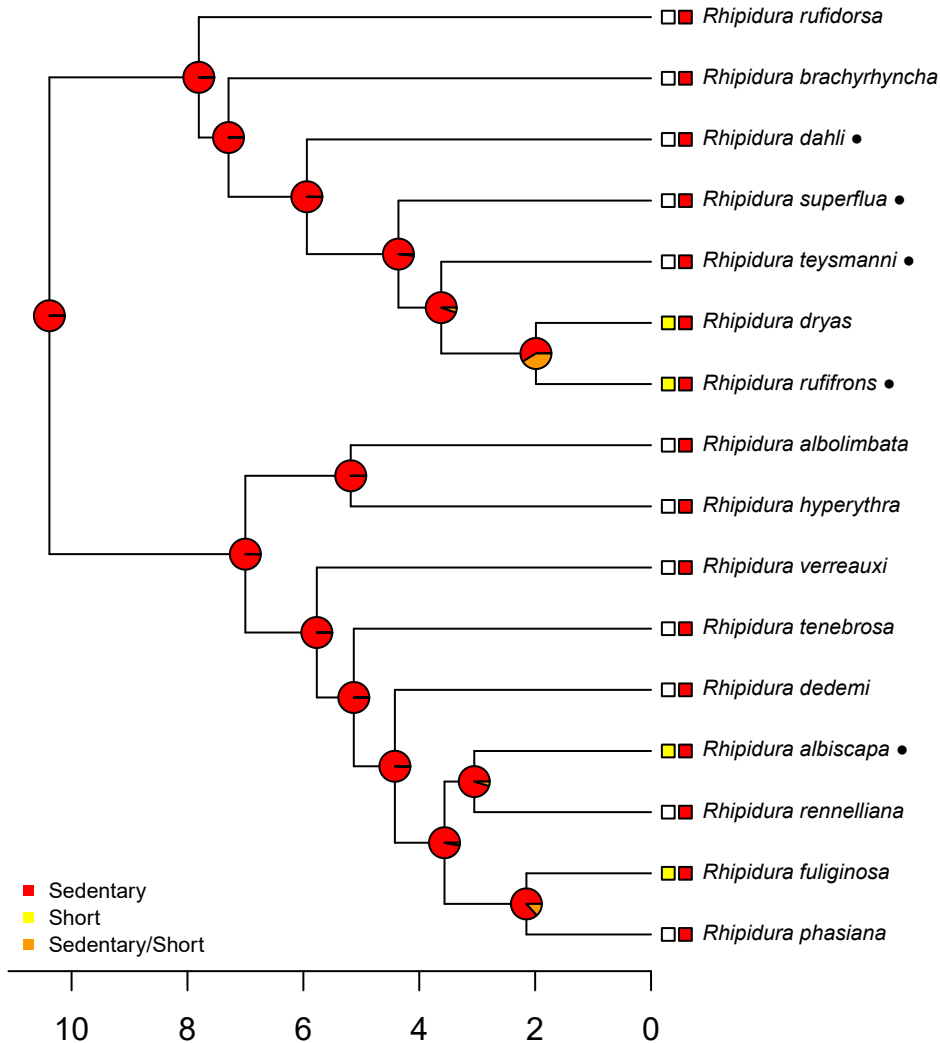

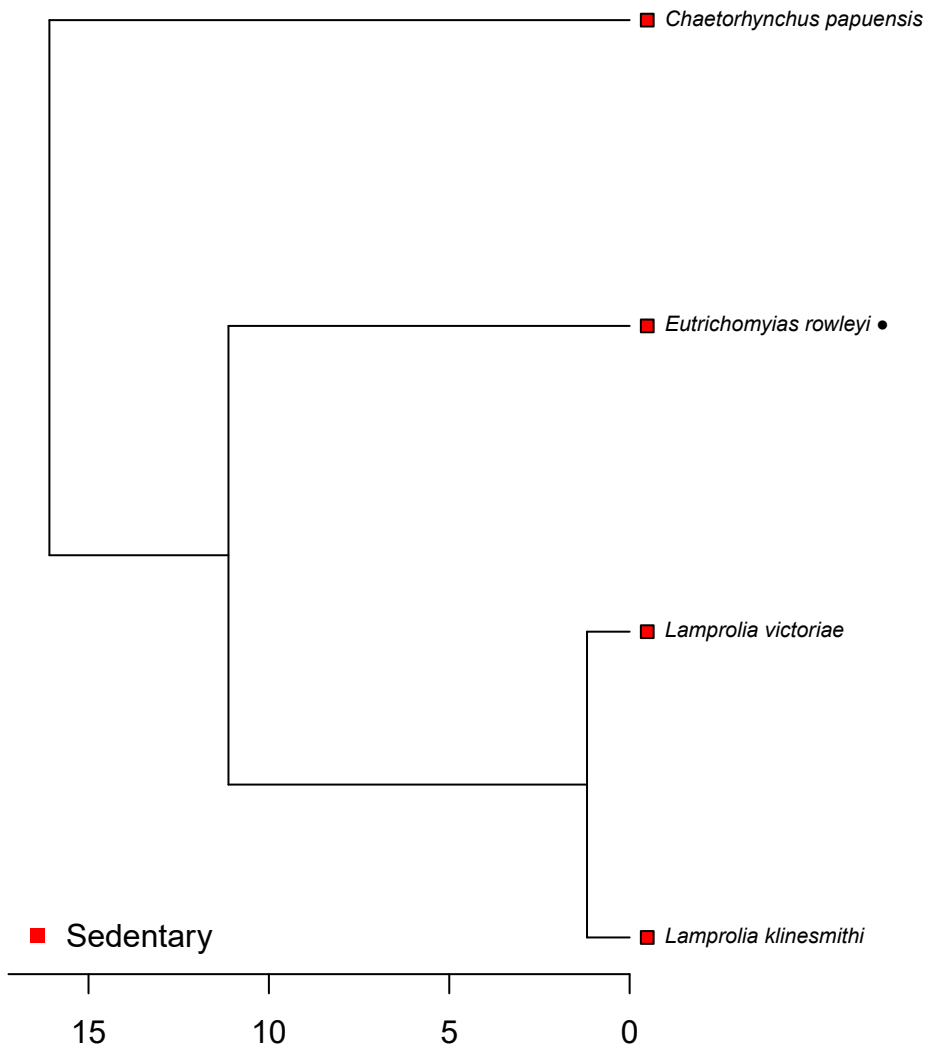

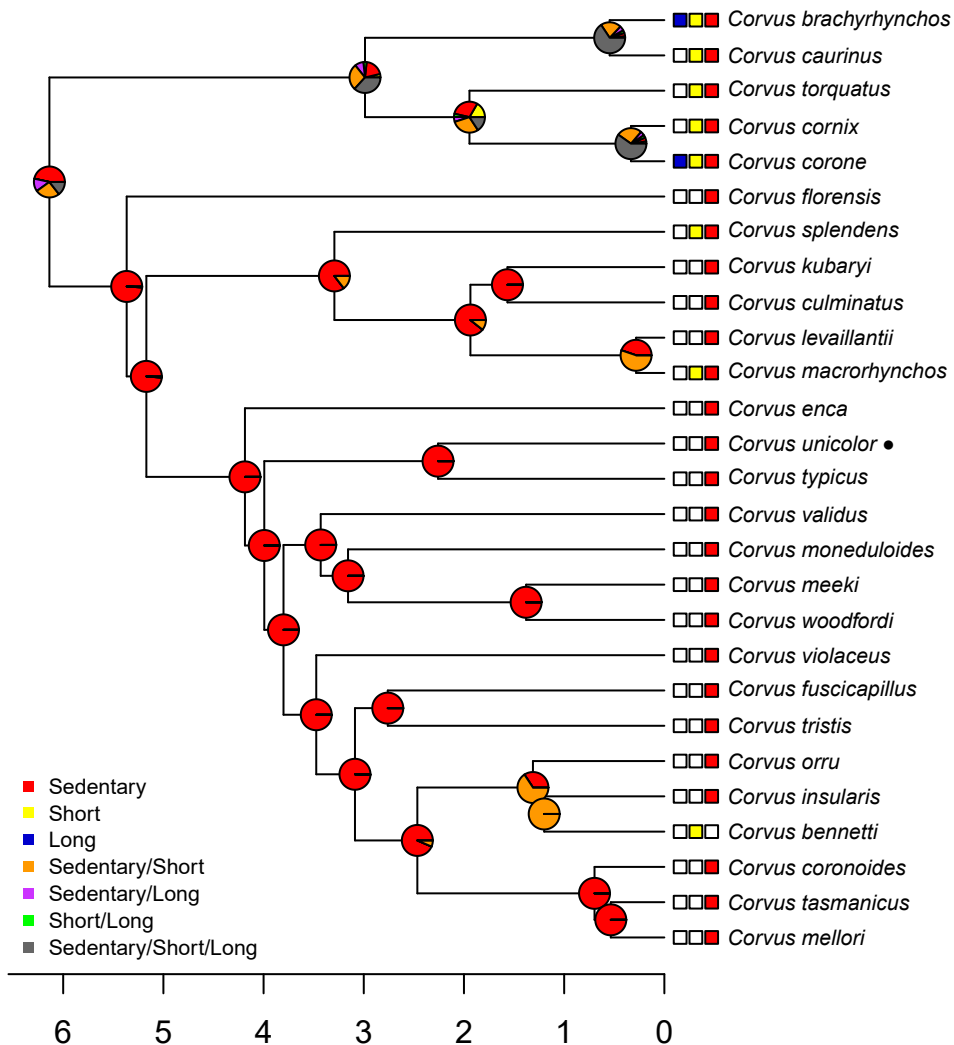

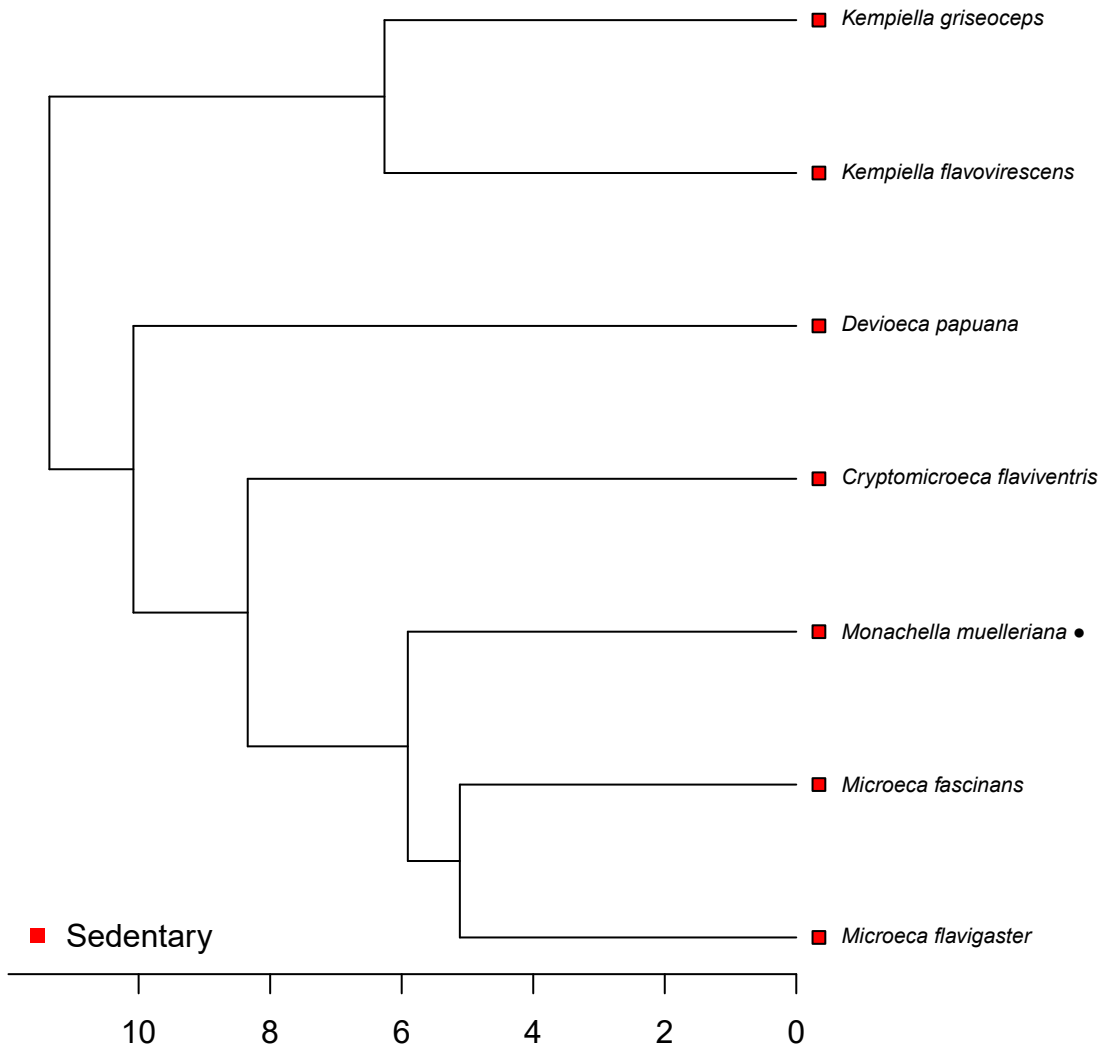

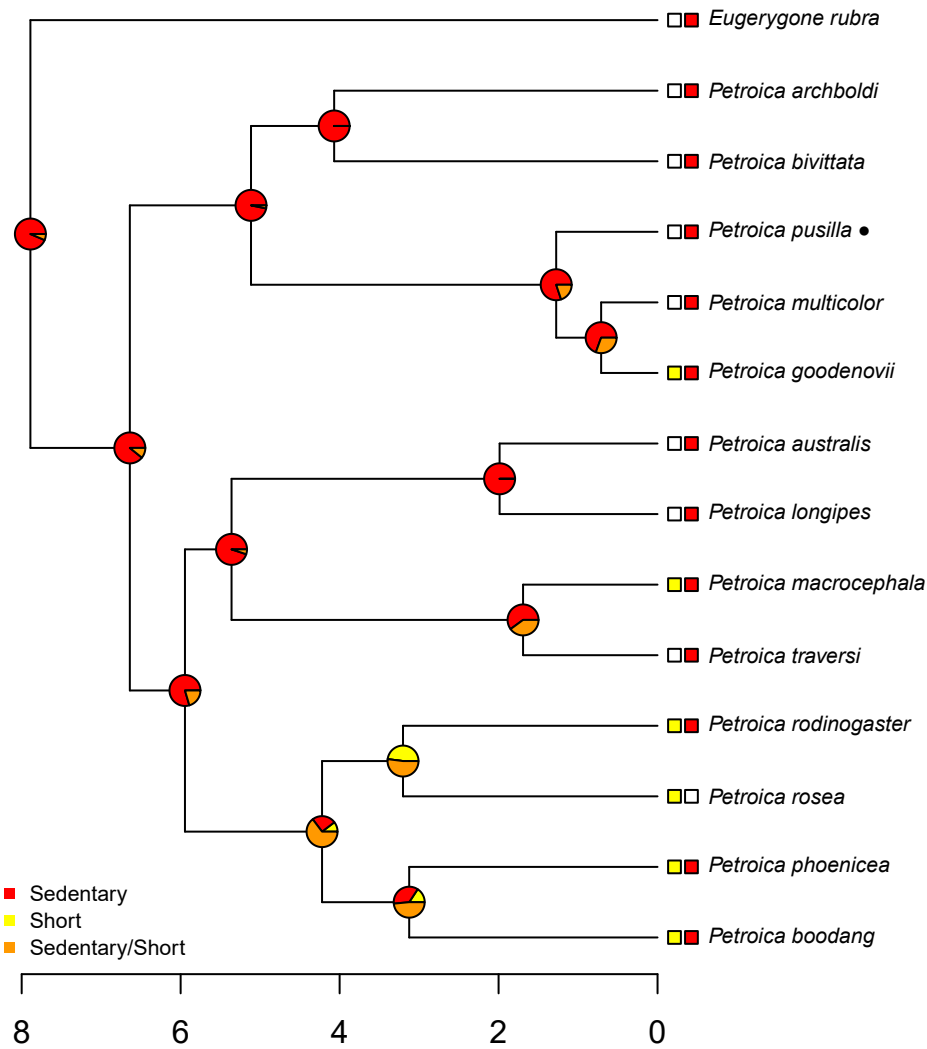



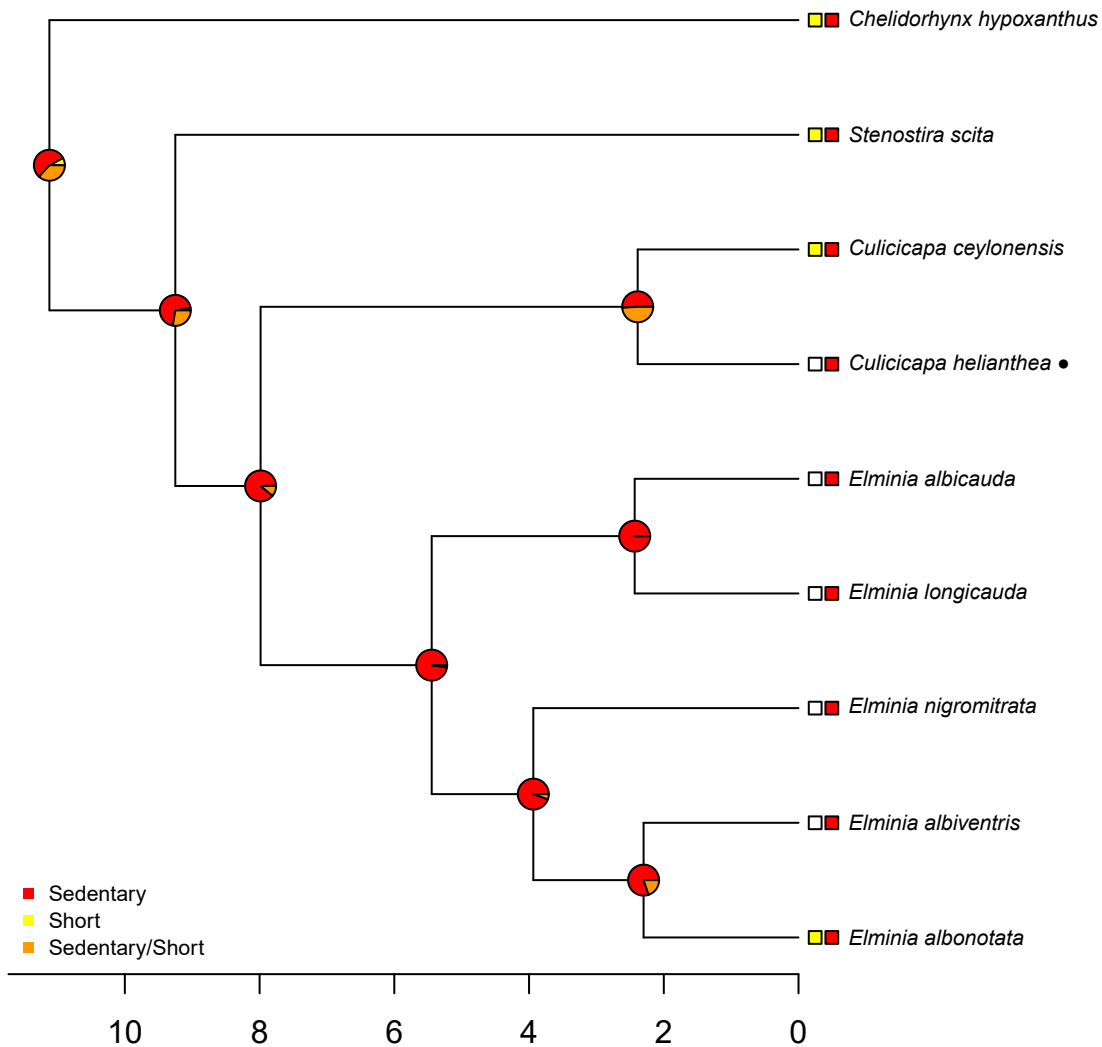

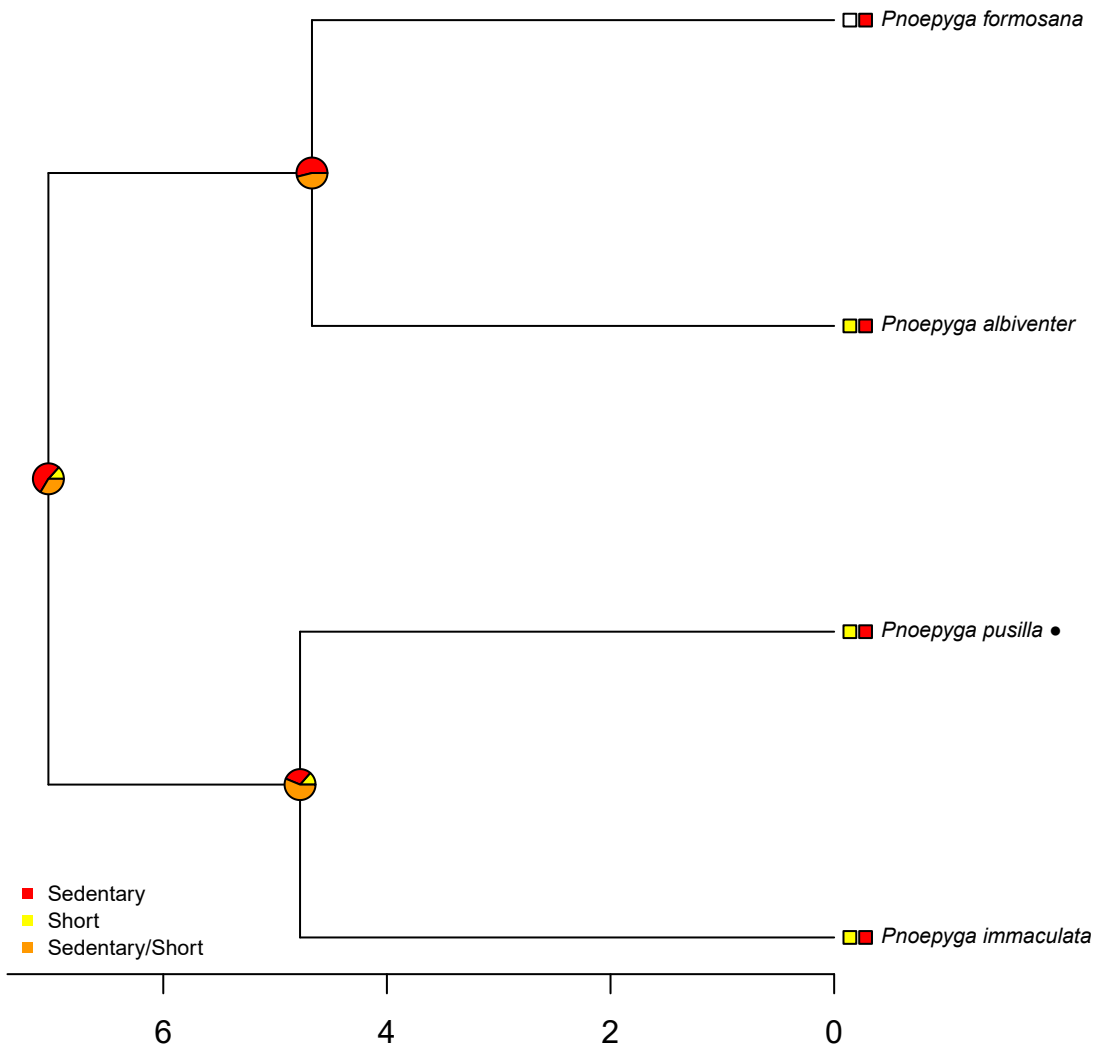

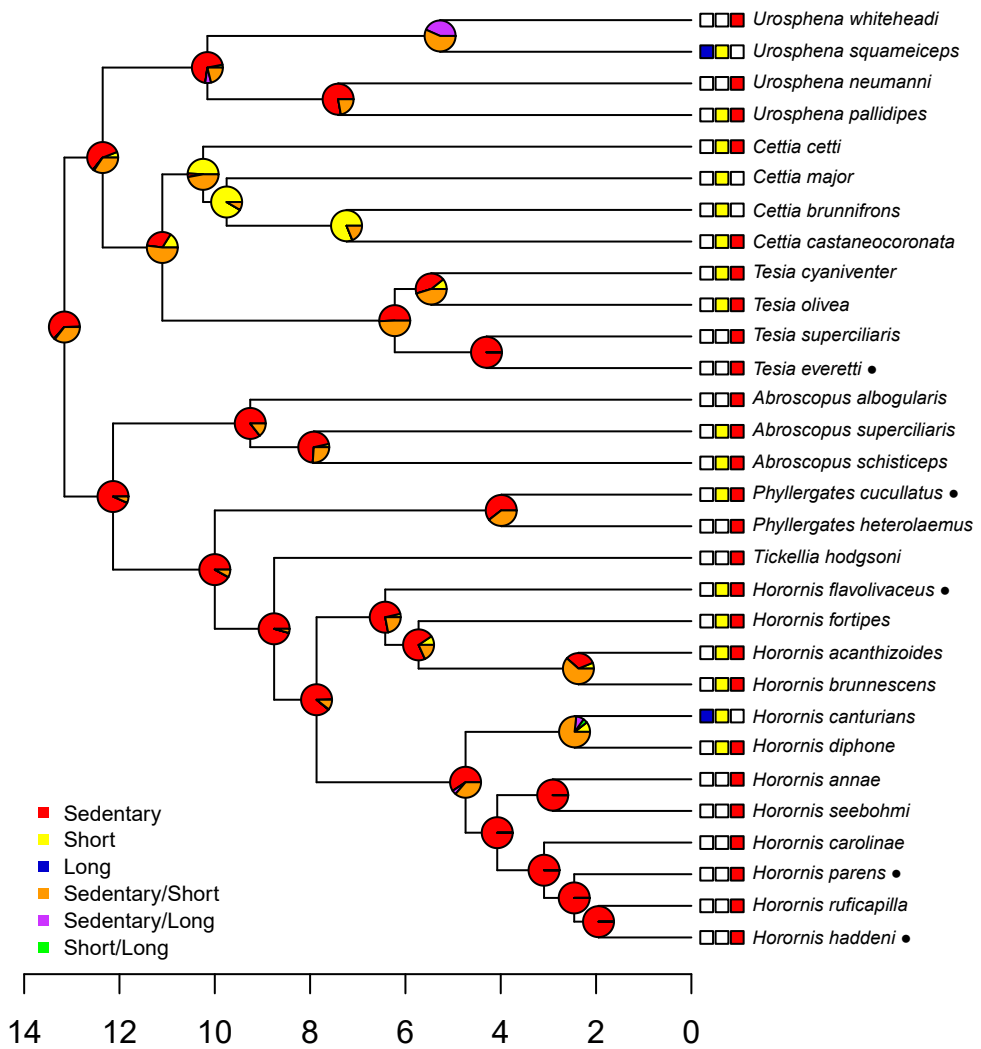

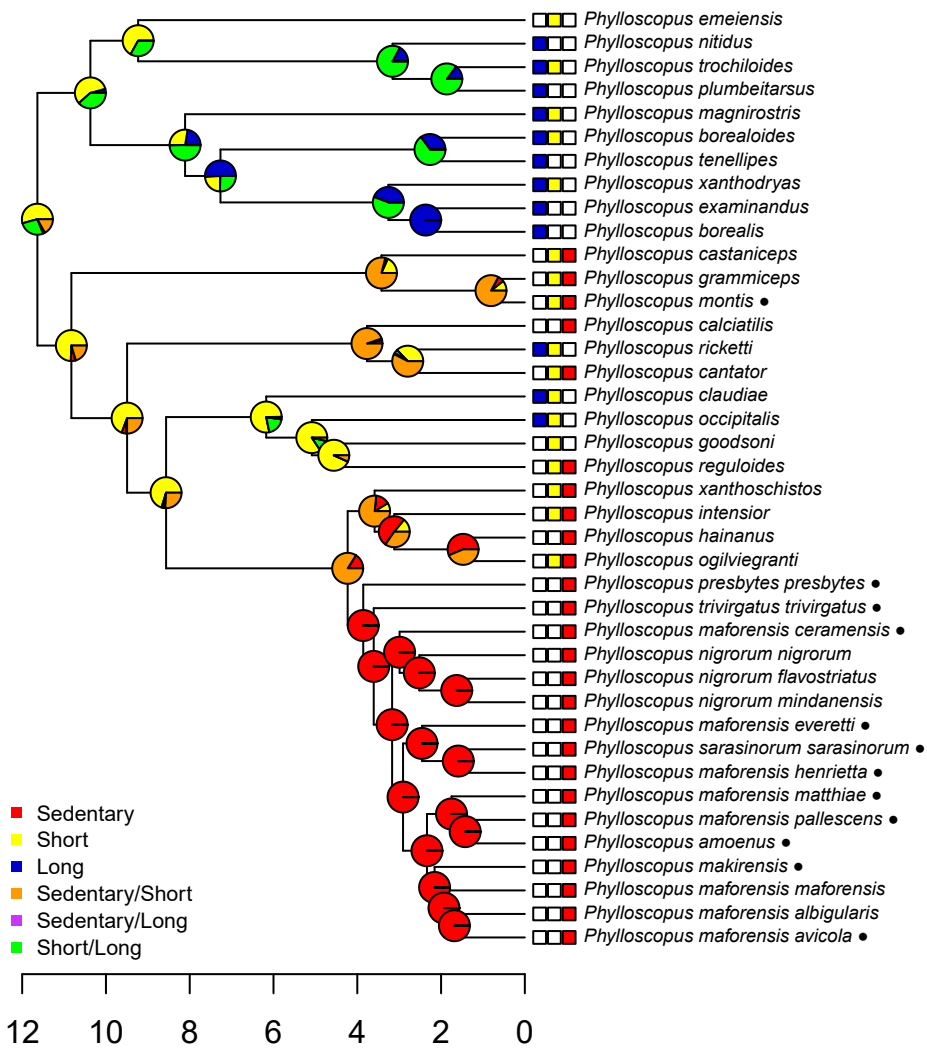

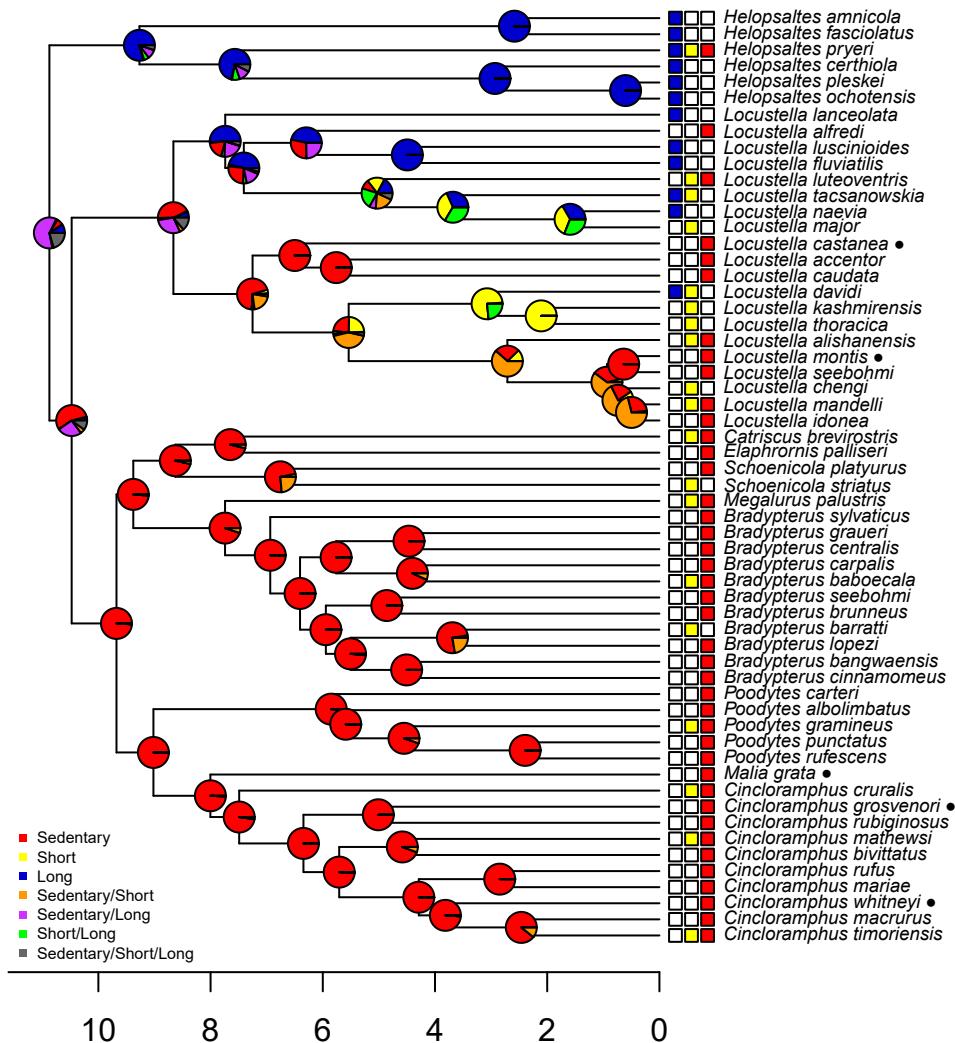

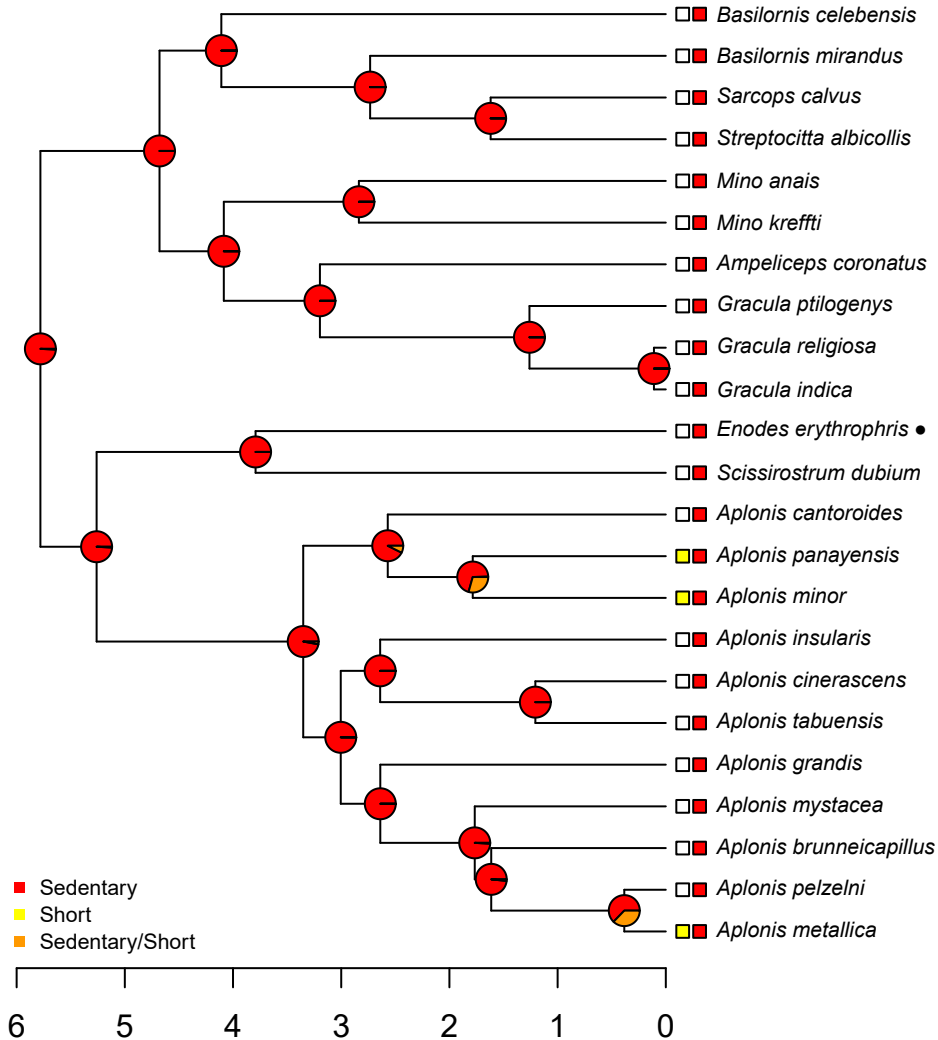

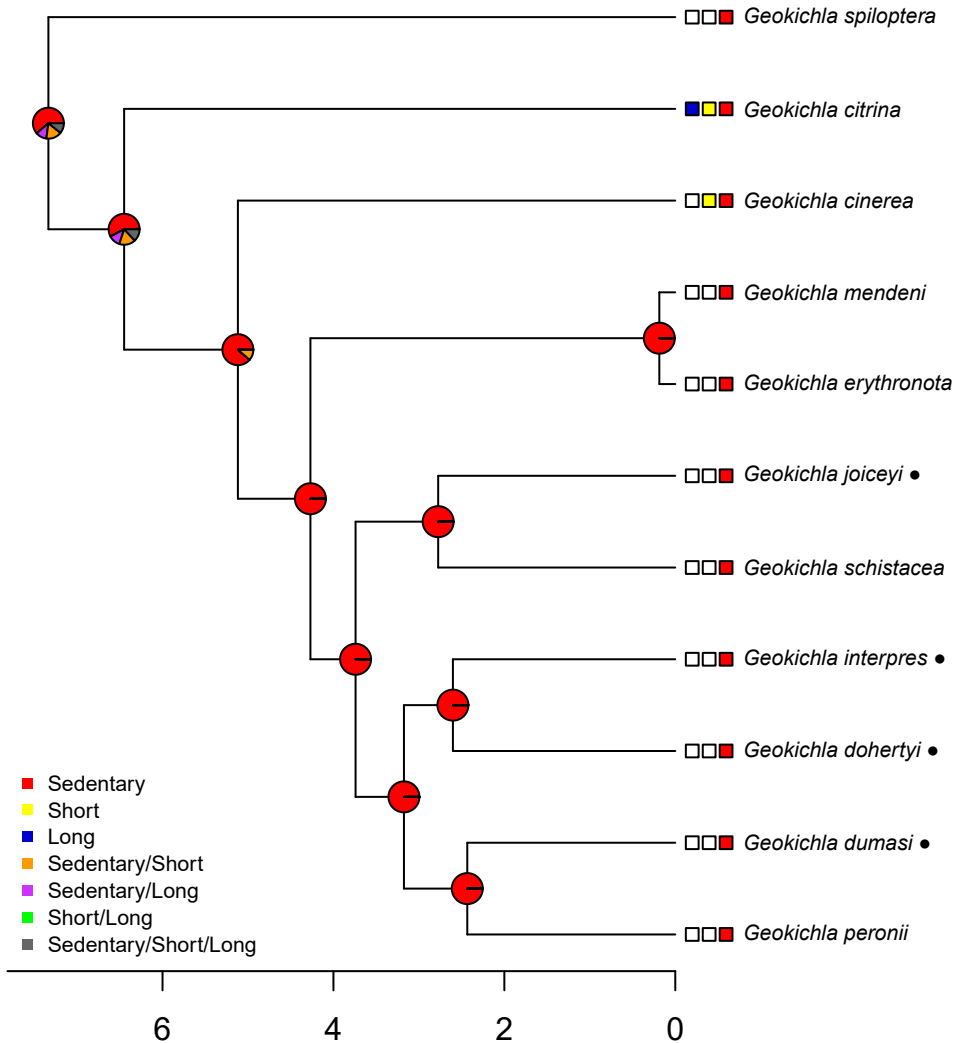

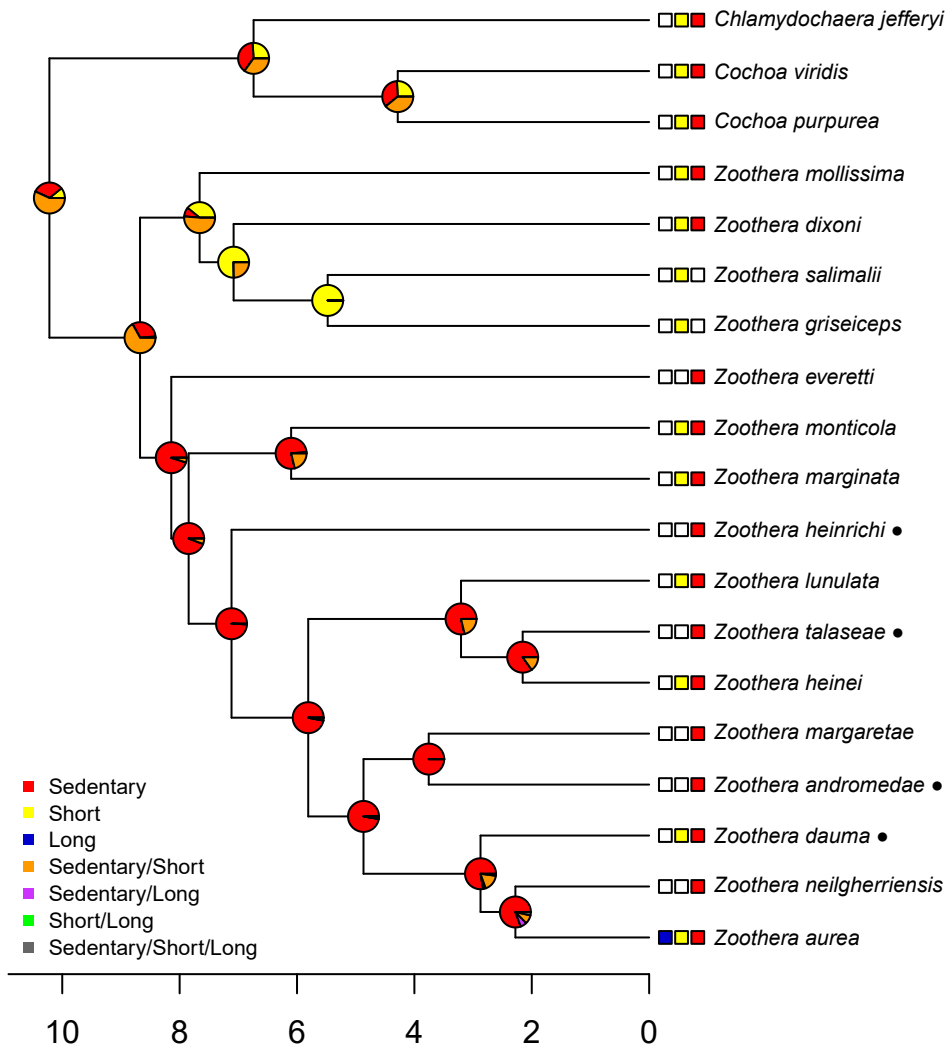



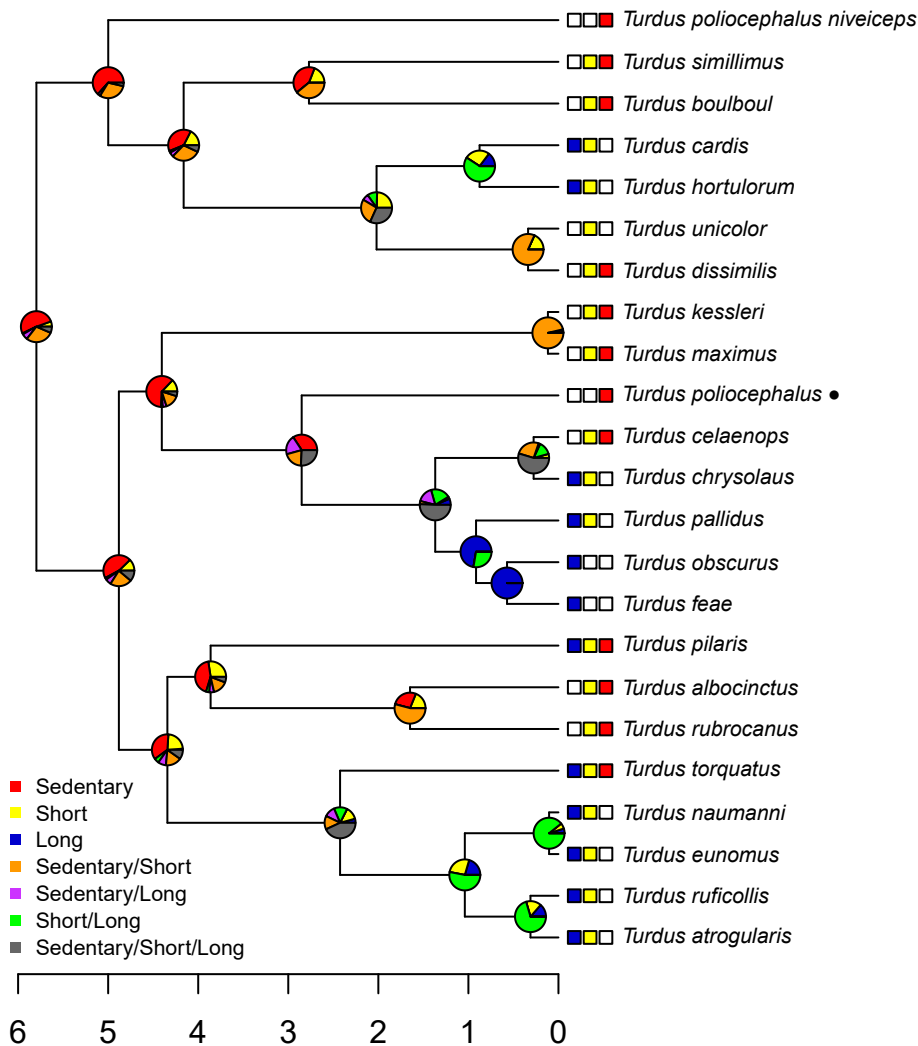

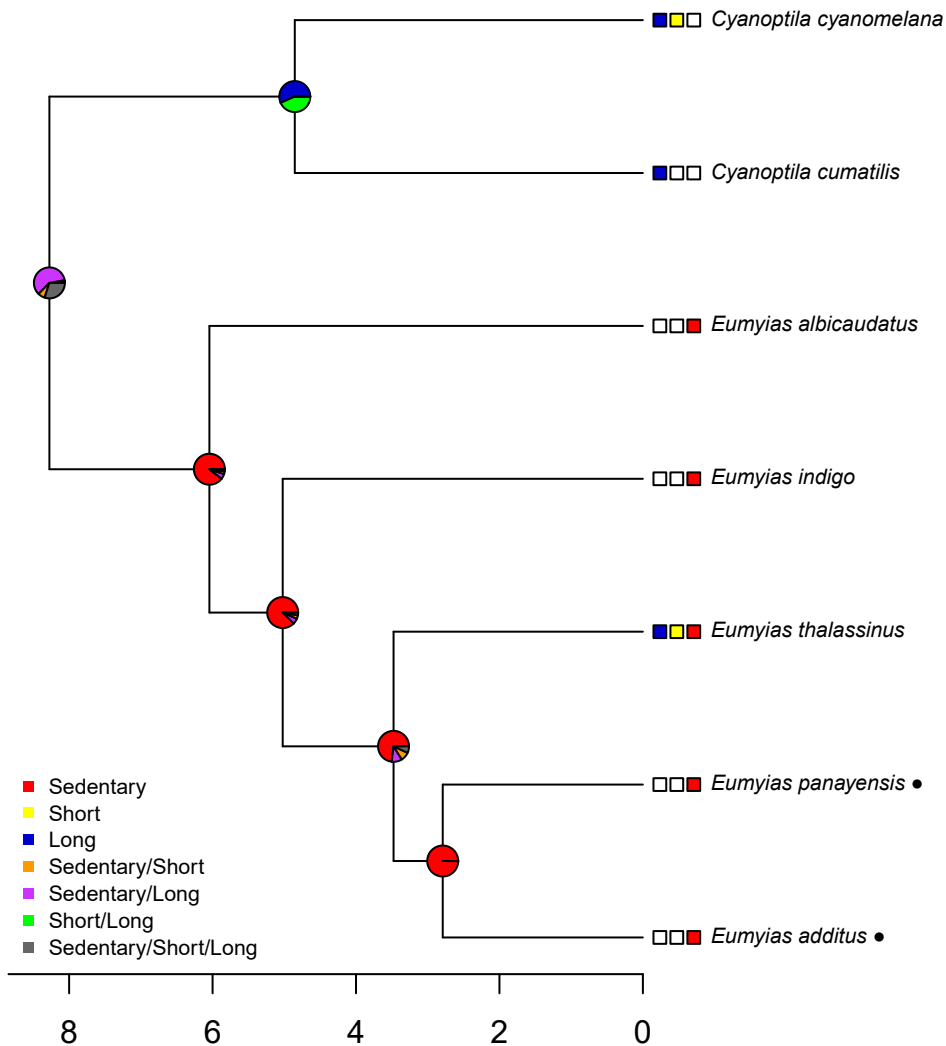

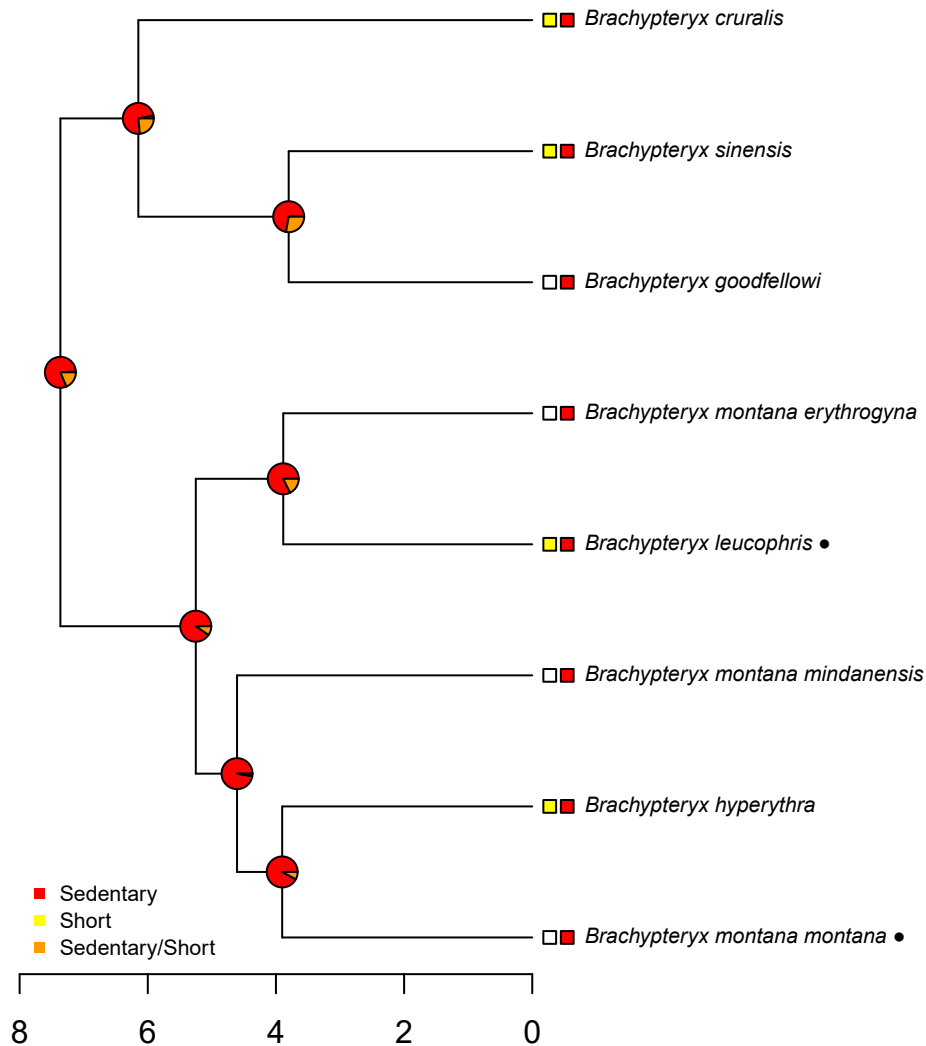

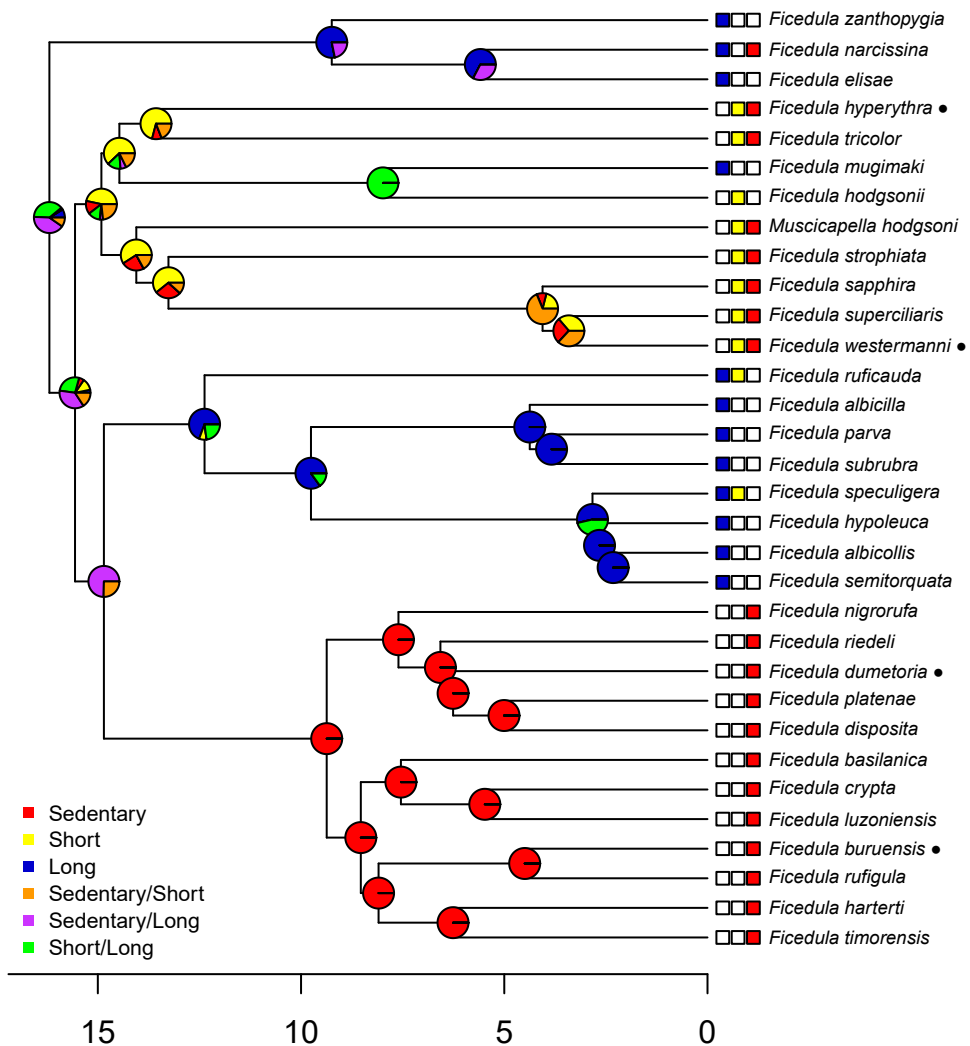

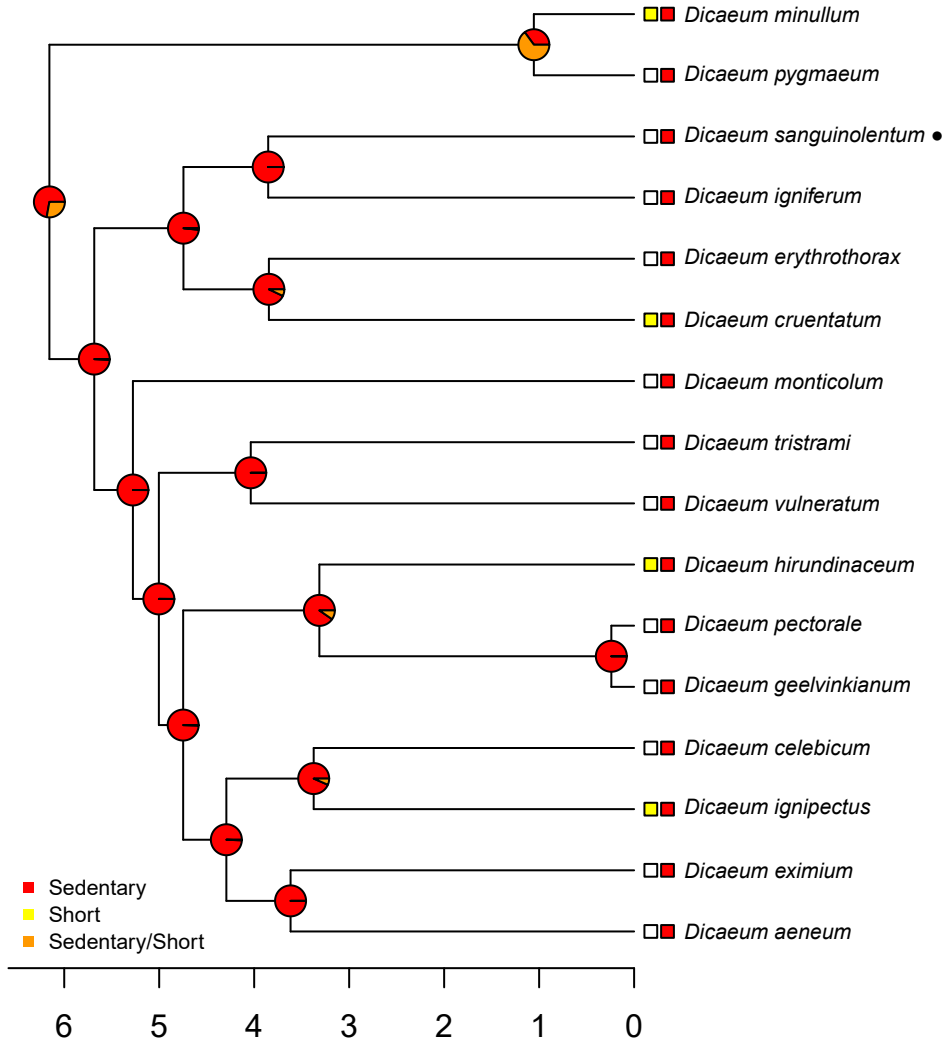

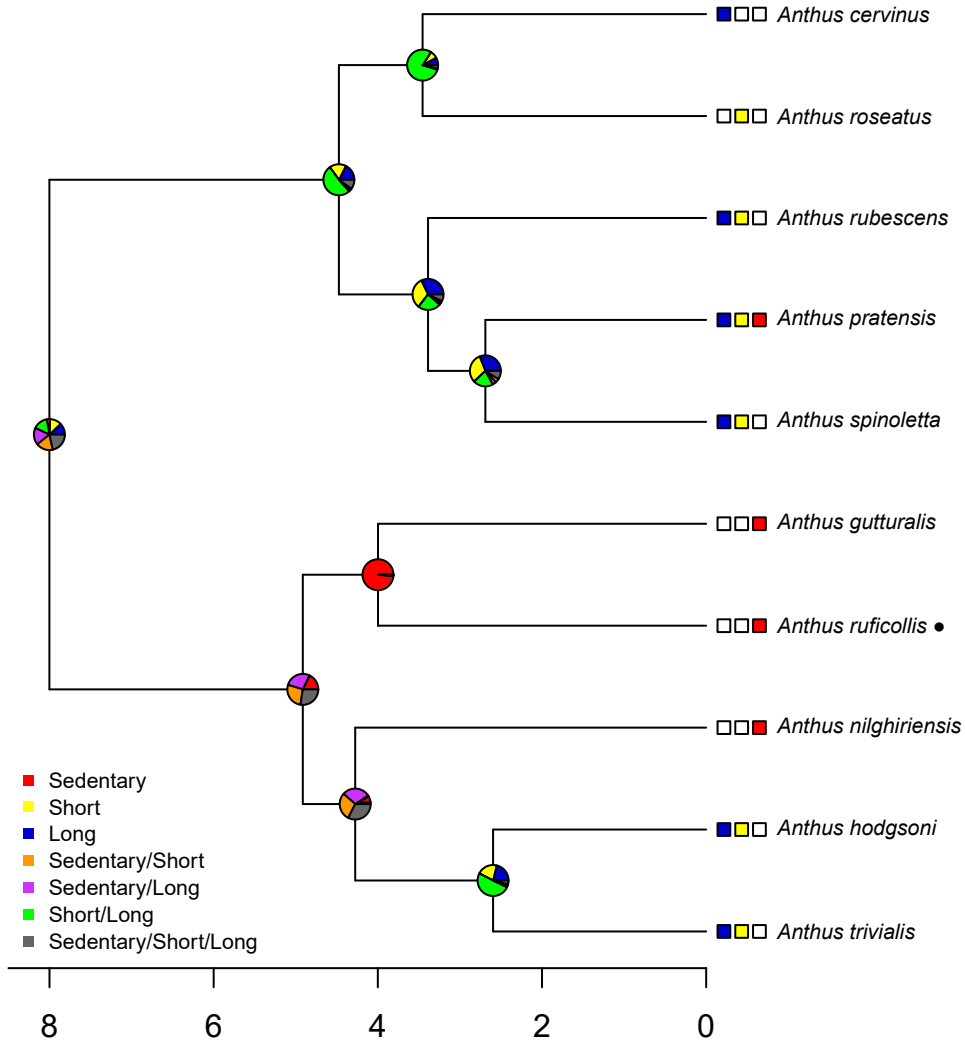

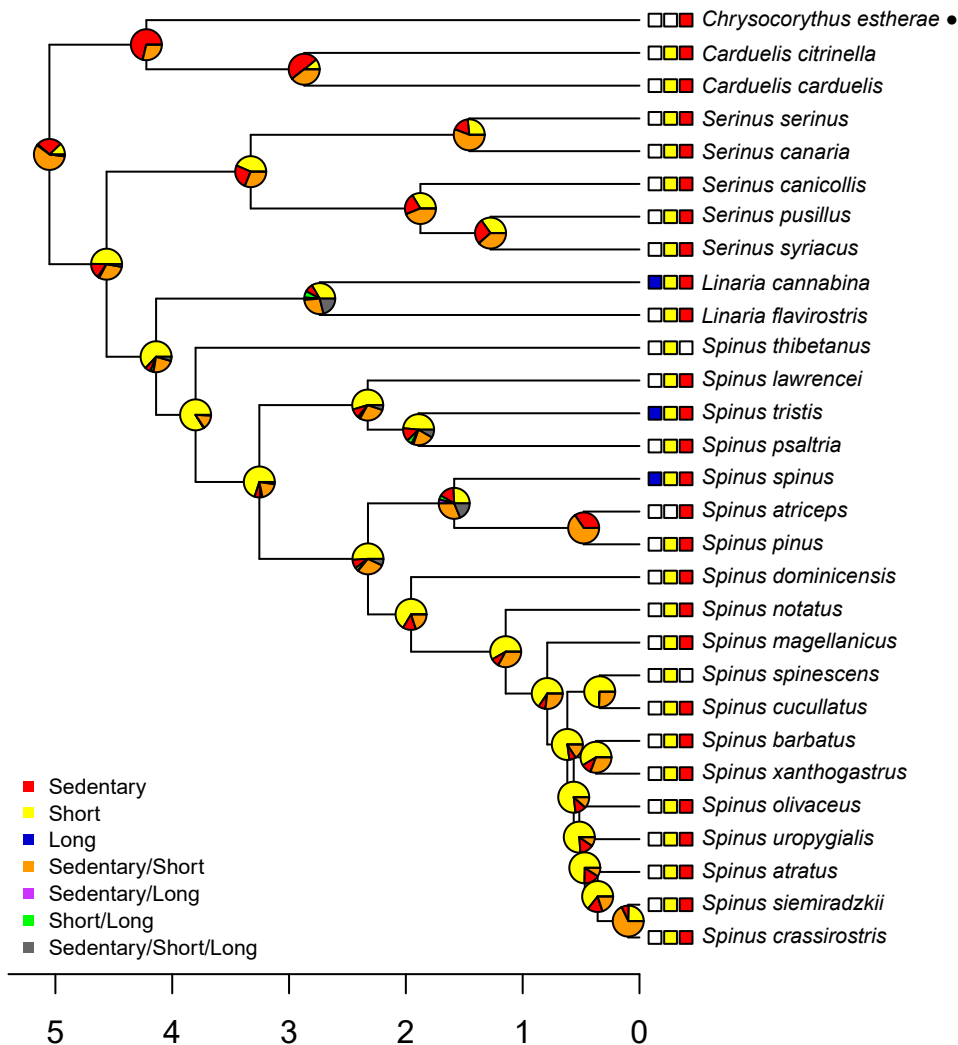

Supplement: 41467_2023_43964_MOESM7_ESM.pdf [file 41467_2023_43964_MOESM7_ESM.pdf]
