# Supplementary material for: The formation of the Indo-Pacific montane avifauna
Source: PubMed Central journal article supplement (PMC10713610; doi:10.1038/s41467-023-43964-y), 2023-12-11
Supplement: 41467_2023_43964_MOESM3_ESM.pdf [file 41467_2023_43964_MOESM3_ESM.pdf]

## **DESCRIPTION OF ADDITIONAL SUPPLEMENTARY FILES**

**Supplementary Data 1.** Species distributions, region assignments, co-occurrence patterns, migratory behavior, and ancestral elevational distribution and migratory behavior.

**Supplementary Data 2.** Species-level phylogenetic trees.

**Supplementary Data 3.** Tree files.

**Supplementary Data 4.** Ancestral state reconstructions: geographic range, elevational range, and migratory behavior.

**Supplementary Data 5.** Species-level phylogenetic analyses: gene sampling, settings, etc.

**Supplementary Data 6.** Specimen and sequence data accession information.

**Supplementary Data 7.** List of primers.
